# Supplementary material for: Taxifolin Inhibits the Growth of Non-Small-Cell Lung Cancer via Downregulating Genes Displaying Novel and Robust Associations with Immune Evasion Factors
Source: Cancers (Basel). 2023 Sep 30;15(19):4818. doi: 10.3390/cancers15194818 (PMC10571863; doi:10.3390/cancers15194818)
Supplement: Supplementary file 1 [file cancers-15-04818-s001.zip]

Archive with 4 entries (4 files):
- Sup Figs S1-S12.pdf
- Table S1.xlsx
- Table S2.xlsx
- Table S3.pdf
