# Supplementary material for: Taxifolin Inhibits the Growth of Non-Small-Cell Lung Cancer via Downregulating Genes Displaying Novel and Robust Associations with Immune Evasion Factors
Source: Cancers (Basel). 2023 Sep 30;15(19):4818. doi: 10.3390/cancers15194818 (PMC10571863; doi:10.3390/cancers15194818)
Supplement: Supplementary file 1 [file cancers-15-04818-s001.zip › Table S1.xlsx]

## Sheet: Table S1A
Table S1A. GSEA analysis of taxifolin-affected LL2 gene expression using the GO gene sets
ONTOLOGY	ID	Description	setSize	enrichmentScore	NES	p.adjust	core_enrichment
MF	GO:0003735	structural constituent of ribosome	153	0.671771	2.94828	1.8988e-08	67945/19933/66845/26451/68537/19981/66481/68052/432502/17724/17725/57808/20042/19934/27370/66493/76846/20088/20103/66292/20091/66489/268449/67671/68836/19951/225215/27367/27050/66416/67025/67115/67427/20090/54217/66475/20084/68028/76808/57294/267019/68611/66419/20055/56040/27395/68735/100502825/19899/328825/20116/64660/74600/65111/26961/94067/67186/94063/20102/216767/319195/64657/27397/19988/9406…
CC	GO:0098800	inner mitochondrial membrane protein complex	122	0.667367	2.84412	1.8988e-08	407790/68202/70257/71679/27425/17992/67126/67067/68197/66576/66091/17991/12858/107197/67530/67264/66477/66377/11958/68342/66495/230075/66152/407785/66046/72900/57423/66416/12857/67680/22272/17993/595136/67184/66218/66916/84682/433771/17718/66815/66098/228033/12861/68316/68349/69875/66052/11950/28080/67713/70316/66694/66148/66928/66541/104130/14356/66108/66449/21855/66414/93757/21854/69029/54405/1…
CC	GO:0062023	collagen-containing extracellular matrix	248	0.55606	2.56433	1.8988e-08	50530/235130/16948/16949/16000/17150/233744/320712/23794/56744/14115/71660/12843/50706/68792/216725/12842/12832/94352/21859/18295/116847/17395/19242/373864/14114/12818/12816/20657/77739/76293/12258/18858/21857/22413/17313/74145/13640/66695/109901/23888/14119/14734/21808/20692/67896/21828/230971/16773/269855/20194/11727/73230/12819/214425/407800/11745/12824/20200/67448/13014/14066/18787/12111/2056…
CC	GO:0031012	extracellular matrix	309	0.538575	2.54737	1.8988e-08	50530/235130/22403/16948/16949/16000/17150/233744/320712/23794/56744/14115/71660/12843/50706/68588/68792/329278/216725/12842/12832/94352/21859/18295/116847/17395/19242/373864/78892/26561/14114/12818/12816/20657/77739/76293/17390/12258/18858/21857/22413/17313/242939/74145/13640/66695/109901/23888/14119/14734/100689/17394/269295/21808/20692/67896/21828/15442/230971/16773/269855/20194/11727/19288/21…
MF	GO:0008201	heparin binding	105	0.56759	2.34884	6.28913e-08	235130/22403/20307/320712/23794/56744/50706/20564/17229/116847/19242/78892/23893/67896/21828/14314/12628/11727/20562/21922/407800/19934/20306/70370/56330/20563/76477/16782/21825/20720/20377/17967/81877/17242/64074/12831/14178/14219
BP	GO:0006956	complement activation	29	0.710467	2.27219	5.41913e-05	14962/12258/11801/50908/18636/12266/12509/12628/14133/13136/50909/12268/232345/12274/12263
MF	GO:0005125	cytokine activity	98	0.553038	2.27158	1.36051e-06	20307/56744/57349/56221/20305/20315/23893/21857/22413/20308/21808/20293/20310/20303/21943/20302/20306/330122/13590/16181/20311/20300/12985/20295/16323/15289/17319/23886/16168/14560/16156
MF	GO:0008009	chemokine activity	30	0.694445	2.25172	0.000147318	20307/56744/57349/56221/20305/20315/20308/20293/20310/20303/20302/20306/330122/20311/20300/20295
MF	GO:0005539	glycosaminoglycan binding	139	0.520131	2.24643	8.14838e-08	235130/22403/240725/20307/320712/23794/56744/50706/20564/17229/116847/19242/78892/23893/67896/21828/14314/12628/11727/20562/21922/407800/19934/20306/70370/114332/56330/12111/20563/76477/16782/21825/20720/20377/17967/81877/17242/64074/12831/14178/83433/14219/227290/71738/12505/18186
MF	GO:1901681	sulfur compound binding	176	0.502841	2.23934	2.7578e-08	235130/22403/20307/320712/23794/56744/50706/20564/17229/116847/19242/56615/78892/14313/23893/14860/67896/21828/13167/14314/12628/11727/20887/20562/21922/407800/19934/20306/70370/56330/20563/76477/16782/17001/14866/21825/14863/14870/14862/20720/20377/17967/81877/17242/15356/64074/12831/12490/14865/14869/14178/14219
BP	GO:0002548	monocyte chemotaxis	44	0.62429	2.19205	0.000198513	20307/17965/56221/20305/20315/20308/20293/20303/21943/20302/20306/20300/18787/20563/20295/14289/19141
MF	GO:0004252	serine-type endopeptidase activity	71	0.546472	2.10878	0.000113749	18552/17228/17227/13482/17229/17395/14962/17390/210622/17225/50908/109901/17394/14058/244954/66686/50909/76453/13036/14066/78558
MF	GO:0030545	receptor regulator activity	242	0.453092	2.08768	5.25716e-08	22403/20307/16000/56744/17965/50781/20256/57349/56221/18295/19242/20305/20315/14313/23893/21857/14456/22413/13640/20210/20308/20319/21808/16449/20293/20310/21828/67405/11529/20303/22409/223780/320265/21943/20302/20306/330122/13590/16181/20311/74840/69638/20300/12985/20563/97165/20295/16323/27356/63986/15289/11876/17319/20348/23886/16168/23936/54635/70083/17242/14560/16156/14178/215001/71785/14219…
MF	GO:0005198	structural molecule activity	407	0.431827	2.08395	1.8988e-08	50530/17150/233744/320712/14115/12843/50706/68792/12842/12832/18295/116847/373864/14114/12818/13008/12816/76293/67945/66695/14119/20692/21828/19933/66845/16773/26451/68537/16661/19981/66481/18040/68052/432502/17724/17904/17725/57808/20042/73230/12819/19934/12824/27370/66493/76846/20088/20103/66292/20091/66489/268449/67671/68836/19951/225215/27367/27050/66416/12111/67025/20563/67115/29817/76477/16…
BP	GO:1990266	neutrophil migration	96	0.49199	2.01521	0.000577267	20307/56744/57349/16803/56221/20305/20308/68279/270152/20293/20310/21828/20303/12765/20302/20306/330122/16181/20311/20300/20563/20295/14127
BP	GO:0097529	myeloid leukocyte migration	171	0.428197	1.88733	0.000256168	20307/56744/71660/17965/57349/16803/56221/20305/20315/13618/12652/20308/68279/57781/270152/20293/20310/21828/20303/12765/21943/20302/20306/330122/16181/20311/20300/18787/20563/20295/14127/14289/21825/19141/17319/18795/17242/71785/11629/83433/193385/12273/12182/83964/20201/26903/18438/14385/13052
BP	GO:0048247	lymphocyte chemotaxis	40	0.522985	1.80464	0.0204078	20307/56221/20305/14456/20308/13123/20293/20303/20302/20306/20300/20295
BP	GO:0006954	inflammatory response	493	0.284177	1.39952	0.0210184	20307/16000/56744/71660/14125/15368/19223/57349/16803/17229/17312/56221/19242/20305/13618/18858/21857/11801/109901/20210/20308/17394/57781/11555/23887/11815/11433/93671/20293/20310/12061/12266/68197/27052/20303/12363/22320/12765/21943/11551/22163/20302/18035/20655/20306/330122/14293/16181/20311/14066/239337/20300/52392/18787/21672/14598/20563/97165/20295/19222/14127/66824/79464/20698/19172/100340…
CC	GO:0000922	spindle pole	118	-0.377698	-1.7245	0.00500293	103733/71206/66679/17997/15499/74237/231912/211660/26920/223921/19878/50523/224023/217935/75216/67203/20877/26390/70573/208628/26416/218977/68519/233064/214444/18003/68617/13191/99412/18080/12211/12531/259279/320209/101706/217335/51885/16328/328580/21951
CC	GO:0098802	plasma membrane signaling receptor complex	107	-0.38862	-1.74892	0.00552521	105782/16337/14809/26365/320910/16161/170483/16419/22031/11443/54393/14814/54598/11658/11479/16414/16421/16194/210274/16401/16174/16400/58234/22042/192897/114249/16408/19229/16411/16403/16398
BP	GO:0038202	TORC1 signaling	41	-0.498326	-1.83821	0.0137517	216805/277854/230784/224023/108723/270802/80909/56717/74374/70661/237782/110524/230676/22084/56716/74370
BP	GO:0051642	centrosome localization	31	-0.545097	-1.86124	0.00750693	230917/234663/20358/12316/26425/93742/76895/67203/70573/83431/77053/18080/18845/319565/100986/22350/545428/64009
MF	GO:0004709	MAP kinase kinase kinase activity	25	-0.580585	-1.88214	0.0160304	330177/11836/269881/26401/338372/26408/26407/26405/109880/381921/216965/26403/71751/19766/53608/53859/26404/26406
MF	GO:0030159	signaling receptor complex adaptor activity	22	-0.606301	-1.92199	0.0161898	51791/12005/56792/327826/20399/70834/27387/30957/210274/19303/66725/16923/58234
BP	GO:0051307	meiotic chromosome separation	20	-0.621899	-1.92443	0.0164462	71711/105988/104806/268465/233328/78658/193838/52864
MF	GO:0008013	beta-catenin binding	68	-0.463425	-1.9324	0.00327355	21372/233904/13542/12558/11789/65962/12562/76281/17127/71228/12385/216850/77578/19303/80288/56484/328572/13544/18222/23805/59024/24069
CC	GO:0030426	growth cone	164	-0.408899	-1.94873	2.57589e-05	319740/16572/19099/70827/12933/192176/23802/230234/20617/140500/12767/433182/235180/319757/171207/20866/22288/54126/11350/83431/381921/16570/100503659/16971/22368/13542/18080/11789/52822/13430/270163/269254/20336/12759/11785/269717/74018/210274/277360/231876/22084/67095/22284/22240/16401/16400/19206/64930/26404/66725/11603/56508/93699/73340/18039/12402/19229/16728
BP	GO:0007020	microtubule nucleation	23	-0.620416	-1.97187	0.0130546	104318/17257/233276/103733/72205/76707/74237/83679/67203/103768/83431/70799/13191/99412/18080/259279/51885/328580
MF	GO:0042054	histone methyltransferase activity	53	-0.497804	-1.9739	0.00555014	110147/381022/84505/15468/208043/225888/233904/235626/234135/214162/17283/14055/74322/75410/192195/59035/208266/77630
BP	GO:0061371	determination of heart left/right asymmetry	43	-0.530263	-1.98502	0.00538428	67661/68146/319757/18128/74025/21385/18764/14463/13805/207607/17127/14609/18129/277939/225164/21380/24069
MF	GO:0018024	histone-lysine N-methyltransferase activity	43	-0.53568	-2.0053	0.00411551	110147/381022/84505/208043/225888/233904/235626/234135/214162/17283/14055/74322/75410/192195/208266/77630
BP	GO:0031122	cytoplasmic microtubule organization	51	-0.518543	-2.02819	0.00115814	233276/103733/76707/71206/320191/74237/231912/227634/67661/20874/78317/83679/77963/225523/56398/103768/67886/13542/11789/259279/101706/13424/22350/13518/51885/328580/68339
MF	GO:0071889	14-3-3 protein binding	28	-0.617779	-2.05112	0.00261807	107650/11651/18004/224023/69601/118449/20817/16706/22084/17425/16510/74370/75687/384783/16554
MF	GO:0017124	SH3 domain binding	110	-0.489332	-2.20438	3.02918e-06	78610/18571/70292/330662/19248/228359/58194/80987/14725/269800/20662/24055/74155/70432/50795/22376/16331/227801/69601/12371/104015/14809/11491/84092/11350/544817/11492/19707/215280/233489/13430/13429/208869/53618/29816/238130/225028/20401/12704/212531/140580/210274/16332/14609/22240/140579/12549/242687/240057/11487/66610/53321/20975/226250/58234/11856/12402
MF	GO:0005096	GTPase activator activity	217	-0.468402	-2.31915	1.8988e-08	66251/19414/330662/213990/228359/231801/20334/101489/108699/77038/71544/74030/244654/72238/216445/231532/71729/216805/277854/216963/217835/16801/73910/192662/106952/20469/69601/15559/140500/56784/11855/231821/226652/19386/171207/227800/98732/76795/544817/54610/66691/98910/230837/240168/224617/241694/99326/97761/217325/233071/217201/78816/78618/209815/13196/67231/380711/94176/320484/17925/225358/1…
BP	GO:0090630	activation of GTPase activity	72	-0.559288	-2.3816	3.48944e-06	68449/12928/57915/56212/13605/192197/18720/71544/244654/72238/14744/231532/11652/23790/105782/227800/67299/83431/76795/54610/98910/107746/241694/97761/217201/209815/18003/108995/228850/109934/218397/13836/271981/76281/14020/213027/217692/110279/105835/207592/381605/64930/12929/23805/19229
MF	GO:0005088	Ras guanyl-nucleotide exchange factor activity	114	-0.530527	-2.41081	3.49729e-08	13605/263406/320292/57257/74760/20663/20662/229541/226089/242406/209773/79566/217835/75547/54324/211922/13860/16801/19731/227801/226970/268739/74334/54126/98732/107746/240168/77980/70785/19347/94176/30938/67425/319934/227377/109934/22325/14163/223254/380698/13998/69632/26382/24001/237782/207212/74018/223435/101497/76089/277360/110279/20403/71972/102098/105445/56508/210293/329877/98845/219140
MF	GO:0005089	Rho guanyl-nucleotide exchange factor activity	62	-0.606212	-2.47483	6.19344e-07	75547/54324/13860/16801/226970/268739/54126/94176/30938/67425/227377/109934/22325/14163/223254/380698/13998/69632/26382/24001/207212/74018/223435/101497/277360/110279/20403/71972/102098/105445/210293/98845/219140

## Sheet: Table S1B
Table S1B. GSEA analysis of taxifolin-affected LL2 gene expression using the KEGG gene sets
ID	Description	setSize	enrichmentScore	NES	p.adjust	core_enrichment
mmu03010	Ribosome	135	0.686512	2.94367	5.8e-09	67945/19933/68172/66845/26451/68537/19981/66481/68052/100861531/17724/17725/57808/19982/20042/19934/27370/76846/20088/20103/66292/20091/66489/268449/67671/66483/19951/225215/27367/27050/67025/67115/67427/20090/54217/66475/20084/68028/76808/57294/267019/68611/66419/20055/56040/27395/68735/100502825/19899/20116/26961/67186/94063/20102/216767/319195/64657/27176/27397/19988/94064/67281/20068/20044/69…
mmu00190	Oxidative phosphorylation	121	0.639779	2.6868	5.8e-09	407790/17722/68202/242341/71679/27425/17992/67126/68197/66576/66091/17991/12858/67530/67264/110323/66377/11958/68342/17709/66495/230075/66152/407785/66046/12867/72900/12856/57423/66416/12857/67680/22272/17993/595136/67184/66218/66916/12864/11973/84682/17718/114143/66142/228033/12859/12861/76429/12866/68349/69875/66052/11950/28080/13063/73834/74776/70316/66694/20463/66290/66144/104130/66108/66414/…
mmu05415	Diabetic cardiomyopathy	185	0.525306	2.34411	5.8e-09	17228/17227/12843/12842/407790/17395/17390/12491/17722/68202/71679/21808/26415/17992/67126/68197/66576/66091/17991/12858/67530/67264/110323/66377/70456/68342/17709/66495/230075/66152/407785/66046/12867/72900/66416/12857/67680/22272/17993/595136/67184/66218/66916/12864/84682/17718/66142/18795/228033/12859/12861/13033/12866/13057/68349/22335/69875/66052/11950/28080/21954/22333/70316/66694/236900/18…
mmu03050	Proteasome	43	0.624273	2.17543	8.39347e-05	20422/19166/19167/59029/26442/19172/19177/66537/19173/23997/19188/19171/19175/26443/19170/57296/26440/67151/26445/17463/26444/70247/26441/19184/69077/19186/23996/19182/16913/66413/67089
mmu05012	Parkinson disease	233	0.473288	2.17257	5.8e-09	407790/17722/68202/71679/67547/17992/67126/20422/22166/68197/66576/66091/17991/12858/67530/67264/110323/66377/20655/68342/17709/19166/19167/66495/230075/66152/407785/66046/12867/72900/66416/59029/12857/67680/26442/75600/22272/17993/595136/22151/67184/66218/19172/66916/12864/19177/19173/84682/17718/23997/12028/66142/19175/228033/12859/12861/140499/26443/14680/12866/68349/22335/19170/57296/69875/66…
mmu05020	Prion disease	237	0.471176	2.16758	5.8e-09	407790/17722/68202/71679/26415/17992/67126/20422/68197/66576/66091/17991/12858/67530/67264/110323/66377/26427/20655/68342/17709/19166/19167/66495/230075/66152/407785/66046/12867/72900/66416/208677/59029/12857/67680/26442/22272/17993/595136/22151/67184/66218/19172/66916/12864/19177/19173/84682/17718/23997/12028/12995/17967/66142/19175/228033/12859/12861/26443/12274/12866/13057/68349/22335/19170/57…
mmu05208	Chemical carcinogenesis - reactive oxygen species	198	0.478281	2.1547	2.46633e-08	15368/407790/56615/14860/17722/211666/68202/13078/71679/26415/17992/67126/14872/68197/66576/66091/17991/12858/67530/67264/110323/66377/18035/20655/68342/17709/66495/230075/66152/407785/66046/12867/72900/66416/12857/67680/22272/17993/595136/67184/14866/66218/66916/12864/14863/14862/84682/17718/66142/228033/12859/12861/20656/12866/13057/68349/22335/69875/66052/11950/58810/28080/14865/22333/18104/70…
mmu05204	Chemical carcinogenesis - DNA adducts	27	0.684508	2.13602	0.000352741	56615/14860/211666/13078/15483/14872/20887/14866/14863/14870/14862/14865/14869
mmu00980	Metabolism of xenobiotics by cytochrome P450	34	0.645579	2.12917	0.000393836	56615/14860/211666/13078/12409/15483/14872/11529/109857/14866/14863/14870/14862/14865/14869/54486/11532/71755/76263/66447/110198/14873/94284
mmu03060	Protein export	25	0.685039	2.11128	0.000594353	20335/27058/66212/20813/66624/76687/66384/14828/66541/66286/69019/69276/56529/93757
mmu00480	Glutathione metabolism	49	0.592805	2.11092	0.00012992	67305/56615/14860/211666/23887/14778/14872/11758/14598/14866/14863/14870/14862/20603/14865/66073/14869/625249/110175/16790/54486/18263/14775/269951/110208/76263/69590/66447/14768/14873/14630
mmu05171	Coronavirus disease - COVID-19	196	0.465857	2.09446	6.56192e-08	14962/67945/74145/50908/26415/20293/19933/68172/26451/12266/19981/66481/68052/57808/19982/20042/18035/19934/27370/50909/76846/20088/20103/20091/66489/268449/67671/66483/19951/12268/225215/27367/27050/12985/67025/67115/67427/20090/54217/66475/20084/68028/76808/57294/267019/20055/56040/100502825/19899/20116/26961/12274/67186/20102/319195/27176/12263/19988/67281/20068/20044/14109/68436/54127/12273/1…
mmu05016	Huntington disease	260	0.437448	2.03559	5.89236e-08	67305/407790/17722/68202/71679/17992/67126/20422/66491/14778/68197/67710/66576/66091/17991/12858/67530/67264/110323/66377/26427/20655/68342/17709/19166/19167/66495/230075/66152/407785/66046/12867/72900/232910/66416/208677/59029/12857/67680/26442/22272/17993/595136/22151/67184/66218/19172/66916/12864/19177/19173/84682/17718/23997/12028/66142/18795/19175/228033/12859/12861/26443/20656/12866/68349/6…
mmu04061	Viral protein interaction with cytokine and cytokine receptor	59	0.546695	2.0274	0.000393836	20307/56744/57349/56221/20305/20315/12778/20308/20293/20310/20303/12765/20302/20306/330122/20311/20300/20295
mmu04610	Complement and coagulation cascades	48	0.558291	1.97923	0.00086149	14962/12258/74145/50908/18788/14058/12061/12266/12509/12628/13136/50909/21824/14066/12268/18787/19128/232345/20720/18791/12274
mmu04932	Non-alcoholic fatty liver disease	140	0.444652	1.91624	0.000117774	407790/68202/26415/17992/68197/66576/66091/17991/12858/67530/67264/110323/66377/68342/17709/66495/230075/66152/407785/66046/12867/72900/66416/12857/67680/22272/17993/595136/67184/66218/66916/12864/84682/12028/66142/12859/12861/12866/68349/69875/66052/13063/70316/66694/20463/12540/13198/104130/66108/18708/19016/16847/66414/54405/14102/226646/68198/17995/66925/75406
mmu04714	Thermogenesis	208	0.421854	1.91374	1.93485e-05	407790/17722/68202/71679/26415/27425/17992/67126/68197/66576/66091/17991/12858/67530/67264/110323/66272/66377/26427/11958/68342/17709/66495/230075/66152/407785/66046/12867/72900/12856/57423/29861/66359/66416/208677/12857/67680/22272/11461/17993/595136/67184/66218/66916/12864/84682/17718/67155/66142/228033/12859/12861/19092/12866/68349/69487/69875/66052/11950/28080/73694/70316/66694/15461/68493/21…
mmu05014	Amyotrophic lateral sclerosis	310	0.401983	1.89229	5.77948e-07	67305/407790/17722/68202/71679/26415/17992/67126/20422/14778/68197/66576/18040/66091/17991/12858/67530/67264/11727/110323/66377/20655/68342/17709/19166/19167/66495/230075/66152/407785/66046/12867/72900/66416/59029/12857/67680/26442/22272/11461/17993/18645/595136/22151/67184/66218/19172/66916/12864/230908/19177/19173/84682/20383/17718/23997/12028/229279/66142/19175/228033/12859/12861/26443/73205/1…
mmu00590	Arachidonic acid metabolism	31	0.567699	1.83949	0.0149875	19223/12409/23887/66350/109857/67103/66469/14598/17001/13110/625249
mmu04723	Retrograde endocannabinoid signaling	104	0.442995	1.8304	0.00109062	407790/17722/68202/26415/17992/68197/66091/17991/67264/66377/14396/68342/66495/230075/407785/66046/72900/14700/66416/17993/595136/67184/66218/66916/66066/17718/18795/68349/69875/70316/210044/12286/14706/18752/23945/14682/14702/104130/66108/66414/66082/54405/226646/68198/17995/75406
mmu04974	Protein digestion and absorption	57	0.495853	1.82432	0.00423297	12873/12843/13482/12842/12832/373864/12818/12816/12819/12824/11936/12837
mmu00983	Drug metabolism - other enzymes	50	0.505894	1.81711	0.00680964	56615/14860/211666/14872/15452/72361/22271/14866/18102/14863/14870/14862/14865/14869/18103/229363/66588
mmu04060	Cytokine-cytokine receptor interaction	153	0.408947	1.7855	0.00120937	20307/56744/57349/56221/20305/16157/20315/12778/20308/21808/20293/20310/16164/20303/12765/21943/22163/20302/20306/330122/16181/20311/20300/16165/12985/20295/16323/107527/16178/23886/16168/16880/14560/16156/16188/77125/110542
mmu03040	Spliceosome	128	0.410189	1.7375	0.0018811	66441/20643/67039/66094/67678/68011/20641/66618/78651/68479/60365/20639/68183/68981/76938/66373/50783/20383/66125/66492/229279/66101/20637/15381/17149/69878/57905/225027/107686/56031/101214/14105/15382/225160/76936/66070/100042165/20227/73666/20384/233073/21681/76522/66055/20826/108121/20462/67332/20382/27366/75062/27756/108014/76479/68592/81898/53817/56194/13207/55934/433702/22185/56070/67958/66…
mmu00982	Drug metabolism - cytochrome P450	32	0.525197	1.71509	0.0365524	56615/14860/211666/14872/11529/14866/14863/14870/14862/14865/14869/17161/54486/11532/76263/66447/14873/94284
mmu04260	Cardiac muscle contraction	61	0.45812	1.70826	0.0206004	66576/12858/67530/110323/17709/11936/66152/12867/12857/22272/12864/21924/84682/22004/66142/12859/12861/12866/21954/66694/20463/11933
mmu05010	Alzheimer disease	328	0.357266	1.69513	0.000123285	407790/22413/17722/68202/71679/67547/17992/67126/14362/20422/68197/66576/66091/17991/12858/22409/67530/67264/57265/110323/66377/68342/17709/19166/19167/66495/230075/66152/407785/66046/12867/72900/66416/59029/12857/67680/26442/75600/22272/17993/595136/22151/67184/66218/19172/66916/12864/19177/22419/19173/84682/17718/23997/12995/66142/18795/19175/228033/27412/12859/12861/26443/68318/234664/212398/1…
mmu05322	Systemic lupus erythematosus	63	0.451307	1.68699	0.0251442	50908/625328/97114/12266/319158/319167/68024/20641/77605/50909/12268/78303/319164/12274/319157/12263/15081/319162/232440/20823/69386/12259/319178/14131/67332/12519
mmu05022	Pathways of neurodegeneration - multiple diseases	390	0.349206	1.68426	5.56565e-05	67305/407790/22413/17722/68202/71679/26415/17992/67126/14362/20422/14778/68197/66576/18040/66091/17991/12858/22409/67530/67264/57265/110323/66377/20655/68342/17709/19166/19167/66495/230075/66152/407785/66046/12867/72900/66416/59029/12857/67680/26442/75600/22272/17993/595136/22151/67184/66218/19172/66916/12864/230908/19177/22419/19173/84682/17718/23997/12028/12995/66142/18795/19175/228033/27412/12…
mmu04510	Focal adhesion	171	-0.293005	-1.40204	0.0300727	18720/20416/26395/20662/14083/68794/22330/11651/20779/271849/11798/12845/21827/19878/70549/12833/74769/11652/192176/18709/13649/22793/109880/11465/11855/320910/14257/21826/107746/329251/16419/21894/26420/16777/18707/18607/12445/60595/18591/22325/16421/13367/109711/22371/286940/23797/226519/232906/19303/16401/12830/18717/16400/16776/64099/12929/192897/15234/16403/14268/16398
mmu05135	Yersinia infection	124	-0.316651	-1.43074	0.0432532	18720/17874/26395/14083/11651/20779/18021/19878/74769/18033/11652/22376/16801/18709/110651/11465/26416/54126/26420/18707/215280/14281/26431/18803/19697/22325/69632/23797/66513/140580/20111/140579/19303/16401/20112/18717/242687/12929/19229/14268
mmu04722	Neurotrophin signaling pathway	107	-0.326235	-1.43611	0.0497925	72843/20663/19164/20416/26395/20662/11651/271849/74769/18033/11652/23938/26408/18709/192662/327826/110651/23939/109880/26416/11350/107746/20399/26420/18707/18607/18803/19697/77480/73086/23797/234779/20111/20112/108960/170936/26406/56484/16923/12929
mmu04010	MAPK signaling pathway	239	-0.288384	-1.445	0.0185619	21803/20663/19698/17874/26395/20662/14255/16180/15507/68794/319520/17311/11651/18021/19099/18033/11652/14182/192176/23938/26408/12296/26407/26405/110651/13649/23939/16337/109880/235584/17346/26416/14257/58231/13714/21809/240168/381921/18747/193740/216965/26420/26403/102626/12977/14281/15512/18591/17347/12531/71751/19697/12295/225028/218397/73086/13836/286940/23797/30957/67603/26412/15511/66513/24…
mmu04925	Aldosterone synthesis and secretion	71	-0.379184	-1.54731	0.0300727	98660/12915/16835/18747/104111/75292/78284/101540/20845/18797/231991/232975/16890/16440/208647/11515/11513/12288/269060
mmu04144	Endocytosis	225	-0.310963	-1.54811	0.00247006	216724/15039/216439/208092/215632/212285/70527/12390/19334/15051/16396/69091/106572/13854/15040/110557/93742/66251/18571/211673/21812/223593/213990/71770/58194/319277/18805/18720/12774/15015/77038/67028/20779/19345/70432/319740/16572/14972/216963/216238/11771/15239/259300/106952/232227/218441/245666/13649/140500/16835/83814/12767/18759/84092/99371/19349/230837/13859/193740/78618/13196/74998/66313…
mmu04928	Parathyroid hormone synthesis, secretion and action	84	-0.369341	-1.56624	0.0267996	26941/14182/75547/17388/16801/13649/12915/109880/19227/18747/104111/14281/78284/13653/18806/18577/18797/231991/14673/16973/17258/16440/208647/11515/17261/213498/11513
mmu05145	Toxoplasmosis	94	-0.367555	-1.5782	0.0149875	12774/17874/11651/11798/18033/11652/12371/16835/26416/21809/193740/26420/16777/18607/15512/12265/19697/15944/23797/20846/226519/15511/66513/14999/15979/14998/14681/54721/16776/54396/16145/16403
mmu04140	Autophagy - animal	129	-0.348878	-1.59254	0.00994509	12421/78610/68728/76559/245860/26395/11651/97287/74769/11652/29869/18709/13666/19349/217695/18747/26420/18707/18607/13039/100504663/235040/97998/228361/56717/100502698/23797/237782/56790/22084/213948/329015/75669/51897/56716/64930/74370/384783/78943
mmu03460	Fanconi anemia pathway	51	-0.416159	-1.60967	0.0465078	17350/245000/15205/71718/233826/18861/100040608/12189/21975/101831/27015/68275/56210/208836/19714/211651/12144/71711/71885/104806/268465/21976/67561/80905/330554/14087/193838/52864
mmu05168	Herpes simplex virus 1 infection	349	-0.307471	-1.61014	0.000117774	217715/233890/69944/101835/14961/22759/16391/236193/72180/16416/16151/14969/233060/216177/72512/16452/69550/22704/72720/14960/210853/231805/12702/106759/77519/16176/56220/19247/15039/71640/71131/240120/224893/12018/20815/231866/245368/626832/18987/408065/22756/15051/210503/209354/228876/20847/15040/101604/239546/12367/223669/100043772/78921/69228/74352/212276/272347/110557/240038/218314/629016/24…
mmu03250	Viral life cycle - HIV-1	56	-0.411535	-1.62498	0.0365524	18519/17755/23988/192657/69550/319236/208092/72949/13716/18571/12774/218442/58202/14534/76895/15239/26943/20924/12767/218210/235180/19386/93736/270058/12455/64144/12121/17754/328572
mmu04024	cAMP signaling pathway	132	-0.363457	-1.67261	0.00384834	239273/57257/11512/80911/17356/18805/26395/233079/18576/11651/19878/74769/18033/11652/18709/11938/106952/98660/109880/23984/170483/18747/54393/104111/26420/14814/18707/11430/20544/14281/170458/19697/22325/78284/23797/18806/18577/231991/232975/13617/19206/16890/208647/11515/328572/56508/15166/11513/12288/74055/15245
mmu00310	Lysine degradation	55	-0.428933	-1.6886	0.0185619	110147/381022/84505/18822/208043/225888/110593/233904/235626/234135/214162/14055/69188/75410/192195/208266
mmu04910	Insulin signaling pathway	116	-0.387788	-1.72612	0.0018811	68401/14251/53413/20663/20416/26395/20662/18576/11651/20528/271849/74769/11652/19085/18709/15275/19079/16337/109880/20787/228966/19087/18759/53412/110078/17346/107746/18747/26420/18707/18607/17347/107476/19246/56717/23797/16332/105651/22084/16890/64930/74370/384783/12929/18534/12402/14104
mmu04810	Regulation of actin cytoskeleton	178	-0.355645	-1.72654	0.000559531	18720/26395/20662/14083/117150/22330/11651/20779/53978/19878/216963/17886/74769/11652/14182/16801/18709/226970/76884/13649/12767/109880/11465/320910/54126/404710/329251/108083/16419/50884/18707/12672/20544/30938/60595/245857/18591/11789/16414/22325/16421/14163/13367/69632/109711/23797/232906/22350/14164/19303/16401/18717/14673/242687/16400/12929/192897/16408/219140/23805/16411/16403/12062/14268/1…
mmu05412	Arrhythmogenic right ventricular cardiomyopathy	49	-0.470842	-1.80691	0.0149875	12296/11938/11465/320910/16419/16480/110893/12558/12295/16421/14609/12385/16401/16400/13138/12288/192897/16403/16398
mmu04070	Phosphatidylinositol signaling system	84	-0.441134	-1.87069	0.000809833	84095/225326/18796/18718/27399/320634/110911/53332/83493/18720/271424/219135/227333/107650/117150/97287/18704/74769/16331/18709/67073/104015/16329/327655/108083/18707/18803/224020/110524/104418/16332/18797/234779/16330/18717/234515/13139/64436/16440/20975/74055
mmu02010	ABC transporters	33	-0.525959	-1.87601	0.009087	11304/27405/74610/27403/11666/224814/21354/217258/18671/27410/11305
mmu00562	Inositol phosphate metabolism	63	-0.526774	-2.11556	8.39347e-05	30955/84095/225326/18796/18718/320634/53332/83493/18720/219135/107650/117150/97287/104776/18704/103199/74769/16331/67073/104015/16329/108083/18707/18803/224020/71780/16332/18797/234779/16330/18717/234515/64436/20975/74055
mmu04340	Hedgehog signaling pathway	48	-0.554524	-2.12378	0.000288719	14633/26965/214897/319757/68525/18747/68897/66313/76857/74239/75788/240888/17237/19206/57810/24069/15245
