# Supplementary material for: Taxifolin Inhibits the Growth of Non-Small-Cell Lung Cancer via Downregulating Genes Displaying Novel and Robust Associations with Immune Evasion Factors
Source: Cancers (Basel). 2023 Sep 30;15(19):4818. doi: 10.3390/cancers15194818 (PMC10571863; doi:10.3390/cancers15194818)
Supplement: Supplementary file 1 [file cancers-15-04818-s001.zip › Table S2.xlsx]

## Sheet: Table S2A
Table S2A. DEGs (taxifolin compared to DMSO) of mouse genes
Gene symbol	GeneID	Base mean	log2(FC)	StdErr	Wald-Stats	P-values	P-adj	Description	Biological Process (GO)	Kinase Class (UniProt)
Mfap5	50530	235.784	2.39326	0.251521	9.51516	1.81432e-21	2.49143e-17	microfibrillar associated protein 5	GO:0060216 definitive hemopoiesis;GO:0048048 embryonic eye morphogenesis;GO:0048592 eye morphogenesis
Adamts15	235130	65.5857	2.30563	0.269168	8.56576	1.07368e-17	3.68593e-14	a disintegrin-like and metallopeptidase (reprolysin type) with thrombospondin type 1 motif, 15	GO:0022617 extracellular matrix disassembly;GO:0007520 myoblast fusion;GO:0000768 syncytium formation by plasma membrane fusion
Erdr1	170942	115.201	2.20919	0.248533	8.88894	6.16927e-19	4.23582e-15	erythroid differentiation regulator 1	GO:0035019 somatic stem cell population maintenance;GO:0019827 stem cell population maintenance;GO:0098727 maintenance of cell number
Fndc1	68655	118.627	2.07249	0.267218	7.7558	8.77851e-15	1.20547e-11	fibronectin type III domain containing 1	GO:0010666 positive regulation of cardiac muscle cell apoptotic process;GO:0010663 positive regulation of striated muscle cell apoptotic process;GO:0010661 positive regulation of muscle cell apoptotic process
Ccn5	22403	150.09	2.06394	0.251897	8.1936	2.53527e-16	5.80238e-13	cellular communication network factor 5	GO:0001558 regulation of cell growth;GO:0040008 regulation of growth;GO:0008285 negative regulation of cell population proliferation
Pcsk5	18552	110.188	2.05098	0.269521	7.60972	2.74686e-14	3.14333e-11	proprotein convertase subtilisin/kexin type 5	GO:1905609 positive regulation of smooth muscle cell-matrix adhesion;GO:0140447 cytokine precursor processing;GO:2000097 regulation of smooth muscle cell-matrix adhesion
Lox	16948	378.074	1.9889	0.248476	8.0044	1.20047e-15	2.0606e-12	lysyl oxidase	GO:0035906 descending aorta development;GO:0035905 ascending aorta development;GO:0018057 peptidyl-lysine oxidation
Sulf1	240725	142.819	1.97602	0.252939	7.81223	5.61857e-15	8.57269e-12	sulfatase 1	GO:0014846 esophagus smooth muscle contraction;GO:0060686 negative regulation of prostatic bud formation;GO:0035860 glial cell-derived neurotrophic factor receptor signaling pathway
Loxl1	16949	288.387	1.90639	0.237556	8.02502	1.01508e-15	1.99129e-12	lysyl oxidase-like 1	GO:0018057 peptidyl-lysine oxidation;GO:0018158 protein oxidation;GO:0030199 collagen fibril organization
Ccl8	20307	1813.63	1.88641	0.215844	8.73967	2.33787e-18	1.07012e-14	chemokine (C-C motif) ligand 8	GO:0044828 negative regulation by host of viral genome replication;GO:0044793 negative regulation by host of viral process;GO:0048245 eosinophil chemotaxis
Igf1	16000	197.58	1.79519	0.238033	7.5418	4.63544e-14	4.5467e-11	insulin-like growth factor 1	GO:0060283 negative regulation of oocyte development;GO:1900142 negative regulation of oligodendrocyte apoptotic process;GO:1904073 regulation of trophectodermal cell proliferation
Mfap2	17150	57.1638	1.76598	0.269325	6.55708	5.48728e-11	3.76756e-08	microfibrillar-associated protein 2	GO:0030220 platelet formation;GO:0036344 platelet morphogenesis;GO:0048048 embryonic eye morphogenesis
Dpep1	13479	54.6862	1.68753	0.265581	6.35411	2.09633e-10	1.19945e-07	dipeptidase 1	GO:0016999 antibiotic metabolic process;GO:0006751 glutathione catabolic process;GO:0050667 homocysteine metabolic process
Rcn3	52377	607.576	1.67067	0.221278	7.55008	4.34993e-14	4.5467e-11	reticulocalbin 3, EF-hand calcium binding domain	GO:0032964 collagen biosynthetic process;GO:0055091 phospholipid homeostasis;GO:0043129 surfactant homeostasis
Cma1	17228	168.287	1.6403	0.233538	7.0237	2.16074e-12	1.85445e-09	chymase 1, mast cell	GO:0140447 cytokine precursor processing;GO:0034769 basement membrane disassembly;GO:0022617 extracellular matrix disassembly
Spon1	233744	131.326	1.61815	0.260494	6.21184	5.23668e-10	2.76577e-07	spondin 1, (f-spondin) extracellular matrix protein	GO:1902430 negative regulation of amyloid-beta formation;GO:1902992 negative regulation of amyloid precursor protein catabolic process;GO:1902993 positive regulation of amyloid precursor protein catabolic process
Abi3bp	320712	149.295	1.59991	0.26681	5.99642	2.01712e-09	8.65595e-07	ABI family member 3 binding protein	GO:1904596 regulation of connective tissue replacement involved in inflammatory response wound healing;GO:1904597 negative regulation of connective tissue replacement involved in inflammatory response wound healing;GO:1905204 negative regulation of connective tissue replacement
Adamts5	23794	110.895	1.58147	0.260729	6.06558	1.31477e-09	6.22568e-07	a disintegrin-like and metallopeptidase (reprolysin type) with thrombospondin type 1 motif, 5 (aggrecanase-2)	GO:0022617 extracellular matrix disassembly;GO:0007520 myoblast fusion;GO:0000768 syncytium formation by plasma membrane fusion
Mcpt4	17227	175.514	1.57829	0.237173	6.6546	2.84072e-11	2.05309e-08	mast cell protease 4	GO:0002002 regulation of angiotensin levels in blood;GO:0001991 regulation of systemic arterial blood pressure by circulatory renin-angiotensin;GO:0003081 regulation of systemic arterial blood pressure by renin-angiotensin
Cpa3	12873	123.016	1.57775	0.233226	6.76492	1.33387e-11	1.07745e-08	carboxypeptidase A3, mast cell	GO:0002002 regulation of angiotensin levels in blood;GO:0001991 regulation of systemic arterial blood pressure by circulatory renin-angiotensin;GO:0003081 regulation of systemic arterial blood pressure by renin-angiotensin
Pf4	56744	1766.38	1.57416	0.212669	7.40193	1.34218e-13	1.22872e-10	platelet factor 4	GO:0042832 defense response to protozoan;GO:0001562 response to protozoan;GO:0030168 platelet activation
Fbln2	14115	943.525	1.55216	0.231463	6.70586	2.0023e-11	1.52754e-08	fibulin 2	GO:0010811 positive regulation of cell-substrate adhesion;GO:0010810 regulation of cell-substrate adhesion;GO:0030198 extracellular matrix organization
Rarres2	71660	332.657	1.55035	0.24952	6.21333	5.18745e-10	2.76577e-07	retinoic acid receptor responder (tazarotene induced) 2	GO:0019732 antifungal humoral response;GO:0061760 antifungal innate immune response;GO:0010759 positive regulation of macrophage chemotaxis
Nbl1	17965	132.003	1.53775	0.267089	5.75743	8.54033e-09	3.16962e-06	NBL1, DAN family BMP antagonist	GO:0038098 sequestering of BMP from receptor via BMP binding;GO:0035582 sequestering of BMP in extracellular matrix;GO:0048263 determination of dorsal identity
Dmkn	73712	39.8197	1.53265	0.269893	5.67874	1.35689e-08	4.3332e-06	dermokine	GO:1903575 cornified envelope assembly;GO:0071709 membrane assembly;GO:0044091 membrane biogenesis
Gpx7	67305	67.9125	1.52918	0.26902	5.68425	1.31385e-08	4.29566e-06	glutathione peroxidase 7	GO:0006979 response to oxidative stress;GO:0006950 response to stress;GO:0050896 response to stimulus
Galnt16	108760	49.1598	1.52057	0.270119	5.62926	1.80984e-08	5.64834e-06	polypeptide N-acetylgalactosaminyltransferase 16	GO:0018243 protein O-linked glycosylation via threonine;GO:0018242 protein O-linked glycosylation via serine;GO:0006493 protein O-linked glycosylation
Adgrd1	243277	64.3909	1.50912	0.2599	5.80656	6.37711e-09	2.50201e-06	adhesion G protein-coupled receptor D1	GO:0007189 adenylate cyclase-activating G protein-coupled receptor signaling pathway;GO:0007188 adenylate cyclase-modulating G protein-coupled receptor signaling pathway;GO:0007186 G protein-coupled receptor signaling pathway
Fcer1a	14125	35.5459	1.50677	0.268916	5.60314	2.10509e-08	6.4238e-06	Fc receptor, IgE, high affinity I, alpha polypeptide	GO:0032752 positive regulation of interleukin-3 production;GO:0032604 granulocyte macrophage colony-stimulating factor production;GO:0032632 interleukin-3 production
Col1a2	12843	7723.11	1.50282	0.269487	5.57661	2.45246e-08	7.16535e-06	collagen, type I, alpha 2	GO:0070208 protein heterotrimerization;GO:0043589 skin morphogenesis;GO:0070206 protein trimerization
Postn	50706	1875.3	1.474	0.268116	5.4976	3.84999e-08	1.03194e-05	periostin, osteoblast specific factor	GO:0071307 cellular response to vitamin K;GO:0032571 response to vitamin K;GO:0071295 cellular response to vitamin
Tmem45a	56277	98.1057	1.46536	0.264971	5.53028	3.19724e-08	9.14677e-06	transmembrane protein 45a	GO:0008150 biological_process
Dkk3	50781	47.5313	1.45638	0.269599	5.40202	6.58961e-08	1.58752e-05	dickkopf WNT signaling pathway inhibitor 3	GO:0032345 negative regulation of aldosterone metabolic process;GO:0032348 negative regulation of aldosterone biosynthetic process;GO:2000065 negative regulation of cortisol biosynthetic process
Chl1	12661	74.8667	1.44903	0.263226	5.50487	3.69448e-08	1.01465e-05	cell adhesion molecule L1-like	GO:0035640 exploration behavior;GO:0008344 adult locomotory behavior;GO:0001764 neuron migration
Ctsk	13038	715.677	1.44659	0.270016	5.35744	8.44089e-08	1.99845e-05	cathepsin K	GO:0006590 thyroid hormone generation;GO:0045453 bone resorption;GO:0042403 thyroid hormone metabolic process
Cthrc1	68588	449.361	1.42728	0.23552	6.06012	1.36017e-09	6.22593e-07	collagen triple helix repeat containing 1	GO:0043932 ossification involved in bone remodeling;GO:0090177 establishment of planar polarity involved in neural tube closure;GO:0042249 establishment of planar polarity of embryonic epithelium
Gm4786	213781	303.659	1.41177	0.228676	6.17367	6.67244e-10	3.27235e-07	predicted gene 4786
Srpx2	68792	69.793	1.41056	0.266643	5.29008	1.22263e-07	2.70794e-05	sushi-repeat-containing protein, X-linked 2	GO:0090050 positive regulation of cell migration involved in sprouting angiogenesis;GO:0071625 vocalization behavior;GO:0090049 regulation of cell migration involved in sprouting angiogenesis
Selenop	20363	3256.75	1.37866	0.21464	6.42312	1.33512e-10	8.33359e-08	selenoprotein P	GO:0001887 selenium compound metabolic process;GO:0009791 post-embryonic development;GO:0007626 locomotory behavior
Mir703	735265	272.636	1.37291	0.23885	5.74803	9.02899e-09	3.26279e-06	microRNA 703
Dact1	59036	28.2342	1.37235	0.268746	5.1065	3.28178e-07	5.70449e-05	dishevelled-binding antagonist of beta-catenin 1	GO:1904863 regulation of beta-catenin-TCF complex assembly;GO:1904864 negative regulation of beta-catenin-TCF complex assembly;GO:0048619 embryonic hindgut morphogenesis
Hmox1	15368	10249.3	1.3718	0.167408	8.19437	2.51905e-16	5.80238e-13	heme oxygenase 1	GO:0006788 heme oxidation;GO:0032764 negative regulation of mast cell cytokine production;GO:0034395 regulation of transcription from RNA polymerase II promoter in response to iron
Pla1a	85031	149.078	1.36001	0.243765	5.5792	2.41622e-08	7.16535e-06	phospholipase A1 member A	GO:0016042 lipid catabolic process;GO:0006629 lipid metabolic process;GO:1901575 organic substance catabolic process
Tnn	329278	64.7849	1.35865	0.270113	5.02991	4.90708e-07	7.74529e-05	tenascin N	GO:1905899 regulation of smooth muscle tissue development;GO:1905239 regulation of canonical Wnt signaling pathway involved in osteoblast differentiation;GO:1905240 negative regulation of canonical Wnt signaling pathway involved in osteoblast differentiation
Fibin	67606	43.4138	1.34844	0.268976	5.01323	5.35227e-07	8.16637e-05	fin bud initiation factor homolog (zebrafish)	GO:0010042 response to manganese ion;GO:0070528 protein kinase C signaling;GO:0071548 response to dexamethasone
Adamts2	216725	206.678	1.34561	0.254761	5.28187	1.27874e-07	2.74369e-05	a disintegrin-like and metallopeptidase (reprolysin type) with thrombospondin type 1 motif, 2	GO:0030574 collagen catabolic process;GO:0030199 collagen fibril organization;GO:0032963 collagen metabolic process
Bdh2	69772	47.1924	1.32363	0.27012	4.90017	9.57545e-07	0.000135015	3-hydroxybutyrate dehydrogenase, type 2	GO:0009237 siderophore metabolic process;GO:0019290 siderophore biosynthetic process;GO:0019184 nonribosomal peptide biosynthetic process
Clec11a	20256	38.7589	1.31862	0.269164	4.89894	9.63553e-07	0.000135015	C-type lectin domain family 11, member a	GO:0001503 ossification;GO:0008284 positive regulation of cell population proliferation;GO:0042127 regulation of cell population proliferation
Ptgis	19223	132.394	1.31523	0.22902	5.74289	9.30735e-09	3.27714e-06	prostaglandin I2 (prostacyclin) synthase	GO:0035360 positive regulation of peroxisome proliferator activated receptor signaling pathway;GO:1900119 positive regulation of execution phase of apoptosis;GO:0035358 regulation of peroxisome proliferator activated receptor signaling pathway
Ppbp	57349	259.827	1.31226	0.255198	5.1421	2.71685e-07	4.90892e-05	pro-platelet basic protein	GO:0002523 leukocyte migration involved in inflammatory response;GO:0070098 chemokine-mediated signaling pathway;GO:1990868 response to chemokine
Arsi	545260	32.8746	1.30735	0.26877	4.86421	1.14917e-06	0.000157805	arylsulfatase i
Svep1	64817	83.2791	1.30556	0.270081	4.83395	1.33848e-06	0.000176731	sushi, von Willebrand factor type A, EGF and pentraxin domain containing 1	GO:0003017 lymph circulation;GO:0048014 Tie signaling pathway;GO:0090136 epithelial cell-cell adhesion
Wfdc17	100034251	1605.24	1.30009	0.202226	6.42889	1.28537e-10	8.33359e-08	WAP four-disulfide core domain 17	GO:0019731 antibacterial humoral response;GO:0019730 antimicrobial humoral response;GO:0006959 humoral immune response
Dpp4	13482	49.2267	1.2888	0.269632	4.77983	1.75439e-06	0.000225152	dipeptidylpeptidase 4	GO:0010716 negative regulation of extracellular matrix disassembly;GO:0002337 B-1a B cell differentiation;GO:0071623 negative regulation of granulocyte chemotaxis
Col1a1	12842	10639.1	1.26953	0.268615	4.72621	2.28743e-06	0.000275536	collagen, type I, alpha 1	GO:0001957 intramembranous ossification;GO:0036072 direct ossification;GO:0032964 collagen biosynthetic process
Rnf128	66889	131.356	1.2431	0.240688	5.16479	2.40703e-07	4.58741e-05	ring finger protein 128	GO:0001818 negative regulation of cytokine production;GO:0031647 regulation of protein stability;GO:0006511 ubiquitin-dependent protein catabolic process
Ndufa4l2	407790	111.954	1.23026	0.233637	5.26569	1.3966e-07	2.93407e-05	Ndufa4, mitochondrial complex associated like 2	GO:0008150 biological_process
Lbp	16803	132.709	1.22649	0.263554	4.65367	3.26085e-06	0.000361113	lipopolysaccharide binding protein	GO:0045919 positive regulation of cytolysis;GO:0015920 lipopolysaccharide transport;GO:0060265 positive regulation of respiratory burst involved in inflammatory response
Col5a2	12832	1527.75	1.22319	0.268625	4.55353	5.27538e-06	0.000548799	collagen, type V, alpha 2	GO:1903225 negative regulation of endodermal cell differentiation;GO:1903224 regulation of endodermal cell differentiation;GO:0030199 collagen fibril organization
Igsf3	78908	32.5591	1.22194	0.264161	4.62575	3.73241e-06	0.000410028	immunoglobulin superfamily, member 3	GO:0032808 lacrimal gland development;GO:0035272 exocrine system development;GO:0048732 gland development
Cdh11	12552	80.689	1.21946	0.269947	4.51743	6.25957e-06	0.000614296	cadherin 11	GO:0021957 corticospinal tract morphogenesis;GO:0021952 central nervous system projection neuron axonogenesis;GO:0016339 calcium-dependent cell-cell adhesion via plasma membrane cell adhesion molecules
Slit3	20564	100.572	1.21562	0.261054	4.65658	3.21501e-06	0.000358931	slit guidance ligand 3	GO:0070100 negative regulation of chemokine-mediated signaling pathway;GO:0035385 Roundabout signaling pathway;GO:0070099 regulation of chemokine-mediated signaling pathway
Tpsb2	17229	229.137	1.20638	0.243889	4.94642	7.55918e-07	0.000110428	tryptase beta 2	GO:0022617 extracellular matrix disassembly;GO:0022411 cellular component disassembly;GO:0030198 extracellular matrix organization
Itgbl1	223272	30.1835	1.20537	0.261385	4.61147	3.99836e-06	0.000432326	integrin, beta-like 1	GO:0033627 cell adhesion mediated by integrin;GO:0007229 integrin-mediated signaling pathway;GO:0007160 cell-matrix adhesion
Galnt17	212996	22.4781	1.20453	0.263431	4.57246	4.82021e-06	0.000509163	polypeptide N-acetylgalactosaminyltransferase 17	GO:0006493 protein O-linked glycosylation;GO:0006486 protein glycosylation;GO:0043413 macromolecule glycosylation
Thy1	21838	424.627	1.19953	0.225623	5.31653	1.05763e-07	2.38089e-05	thymus cell antigen 1, theta	GO:2000298 regulation of Rho-dependent protein serine/threonine kinase activity;GO:0034116 positive regulation of heterotypic cell-cell adhesion;GO:0070571 negative regulation of neuron projection regeneration
Loxl2	94352	533.083	1.19501	0.231424	5.16371	2.42101e-07	4.58741e-05	lysyl oxidase-like 2	GO:0018057 peptidyl-lysine oxidation;GO:0018158 protein oxidation;GO:0032332 positive regulation of chondrocyte differentiation
Timp3	21859	152.314	1.1944	0.251517	4.7488	2.04626e-06	0.000257792	tissue inhibitor of metalloproteinase 3	GO:1903984 positive regulation of TRAIL-activated apoptotic signaling pathway;GO:1903121 regulation of TRAIL-activated apoptotic signaling pathway;GO:1904684 negative regulation of metalloendopeptidase activity
Ms4a4d	66607	37.235	1.18977	0.270104	4.40486	1.05852e-05	0.000908477	membrane-spanning 4-domains, subfamily A, member 4D	GO:0008150 biological_process
Clec10a	17312	178.15	1.17976	0.245002	4.81532	1.46964e-06	0.000190388	C-type lectin domain family 10, member A	GO:0002248 connective tissue replacement involved in inflammatory response wound healing;GO:0097709 connective tissue replacement;GO:0002246 wound healing involved in inflammatory response
Cadm3	94332	32.9736	1.17634	0.270114	4.35497	1.33084e-05	0.0010878	cell adhesion molecule 3	GO:0007157 heterophilic cell-cell adhesion via plasma membrane cell adhesion molecules;GO:0007156 homophilic cell adhesion via plasma membrane adhesion molecules;GO:0098742 cell-cell adhesion via plasma-membrane adhesion molecules
Tagln	21345	212.415	1.17617	0.214044	5.49497	3.90771e-08	1.03194e-05	transgelin	GO:0030855 epithelial cell differentiation;GO:0060429 epithelium development;GO:0009888 tissue development
Ccl24	56221	27.2939	1.17458	0.268985	4.36671	1.26131e-05	0.00103714	chemokine (C-C motif) ligand 24	GO:2000418 positive regulation of eosinophil migration;GO:2000416 regulation of eosinophil migration;GO:0048245 eosinophil chemotaxis
Ogn	18295	134.41	1.1699	0.258982	4.51732	6.26284e-06	0.000614296	osteoglycin	GO:0061975 articular cartilage development;GO:0048662 negative regulation of smooth muscle cell proliferation;GO:0051216 cartilage development
Prelp	116847	76.6633	1.16931	0.267726	4.36758	1.25634e-05	0.00103714	proline arginine-rich end leucine-rich repeat	GO:0090398 cellular senescence;GO:0033554 cellular response to stress;GO:0006950 response to stress
Mmp9	17395	421.884	1.15803	0.224271	5.16355	2.42311e-07	4.58741e-05	matrix metallopeptidase 9	GO:0071460 cellular response to cell-matrix adhesion;GO:2000697 negative regulation of epithelial cell differentiation involved in kidney development;GO:1900122 positive regulation of receptor binding
Cfb	14962	338.335	1.15703	0.196519	5.88765	3.91715e-09	1.63001e-06	complement factor B	GO:0006957 complement activation, alternative pathway;GO:1903028 positive regulation of opsonization;GO:1903027 regulation of opsonization
Ptn	19242	455.622	1.15071	0.242745	4.74038	2.13314e-06	0.000262633	pleiotrophin	GO:0043932 ossification involved in bone remodeling;GO:1904397 negative regulation of neuromuscular junction development;GO:0031104 dendrite regeneration
C1qtnf2	69183	29.6787	1.14535	0.264261	4.33415	1.46325e-05	0.00117505	C1q and tumor necrosis factor related protein 2	GO:0045725 positive regulation of glycogen biosynthetic process;GO:0070875 positive regulation of glycogen metabolic process;GO:0046321 positive regulation of fatty acid oxidation
Pi16	74116	422.96	1.14525	0.267583	4.27998	1.86912e-05	0.00138739	peptidase inhibitor 16	GO:0061052 negative regulation of cell growth involved in cardiac muscle cell development;GO:0061050 regulation of cell growth involved in cardiac muscle cell development;GO:0055022 negative regulation of cardiac muscle tissue growth
Mgst1	56615	148.581	1.14079	0.252664	4.51506	6.32994e-06	0.000616473	microsomal glutathione S-transferase 1	GO:0071449 cellular response to lipid hydroperoxide;GO:0006982 response to lipid hydroperoxide;GO:0071447 cellular response to hydroperoxide
Bmpr2	100504533	155.734	1.13085	0.239861	4.71461	2.42172e-06	0.000286682	bone morphogenetic protein receptor, type II (serine/threonine kinase)	GO:0003252 negative regulation of cell proliferation involved in heart valve morphogenesis;GO:0003250 regulation of cell proliferation involved in heart valve morphogenesis;GO:2000137 negative regulation of cell proliferation involved in heart morphogenesis	yes
Armh4	67419	23.822	1.1264	0.260061	4.33128	1.48242e-05	0.00117964	armadillo-like helical domain containing 4	GO:0008150 biological_process
Npl	74091	279.961	1.12185	0.209653	5.351	8.74681e-08	2.03578e-05	N-acetylneuraminate pyruvate lyase	GO:0019262 N-acetylneuraminate catabolic process;GO:0006054 N-acetylneuraminate metabolic process;GO:0046348 amino sugar catabolic process
Vldlr	22359	118.634	1.12167	0.247953	4.52374	6.07563e-06	0.000608982	very low density lipoprotein receptor	GO:0034447 very-low-density lipoprotein particle clearance;GO:0034436 glycoprotein transport;GO:0038026 reelin-mediated signaling pathway
Col27a1	373864	68.1536	1.11988	0.268022	4.17831	2.93677e-05	0.00198659	collagen, type XXVII, alpha 1	GO:0003431 growth plate cartilage chondrocyte development;GO:0003433 chondrocyte development involved in endochondral bone morphogenesis;GO:0003418 growth plate cartilage chondrocyte differentiation
Gm5526	433297	912.223	1.11973	0.202896	5.51871	3.41492e-08	9.57013e-06	myosin, light polypeptide 6, alkali, smooth muscle and non-muscle pseudogene
Tceal9	22381	3139.09	1.11855	0.19423	5.75887	8.46782e-09	3.16962e-06	transcription elongation factor A like 9
Crispld2	78892	87.4106	1.11811	0.268222	4.1686	3.06475e-05	0.0020331	cysteine-rich secretory protein LCCL domain containing 2	GO:0060325 face morphogenesis;GO:0060323 head morphogenesis;GO:0010171 body morphogenesis
Mmp23	26561	60.8553	1.10516	0.269093	4.10698	4.00872e-05	0.00250217	matrix metallopeptidase 23	GO:0030574 collagen catabolic process;GO:0032963 collagen metabolic process;GO:0030198 extracellular matrix organization
Ccl6	20305	4232.99	1.10493	0.173424	6.37125	1.87497e-10	1.11944e-07	chemokine (C-C motif) ligand 6	GO:0002548 monocyte chemotaxis;GO:0048247 lymphocyte chemotaxis;GO:0070098 chemokine-mediated signaling pathway
Fbln1	14114	224.635	1.09914	0.228195	4.81665	1.45987e-06	0.000190388	fibulin 1	GO:1904187 regulation of transformation of host cell by virus;GO:1904188 negative regulation of transformation of host cell by virus;GO:1904235 regulation of substrate-dependent cell migration, cell attachment to substrate
Il11ra1	16157	902.273	1.09897	0.209721	5.24016	1.60435e-07	3.23984e-05	interleukin 11 receptor, alpha chain 1	GO:0046697 decidualization;GO:0001779 natural killer cell differentiation;GO:0001893 maternal placenta development
Col14a1	12818	352.732	1.09344	0.212807	5.13819	2.77394e-07	4.94698e-05	collagen, type XIV, alpha 1	GO:0061050 regulation of cell growth involved in cardiac muscle cell development;GO:0048873 homeostasis of number of cells within a tissue;GO:0030199 collagen fibril organization
Tmem100	67888	50.3352	1.09171	0.268847	4.06069	4.89271e-05	0.00289627	transmembrane protein 100	GO:0060842 arterial endothelial cell differentiation;GO:0060837 blood vessel endothelial cell differentiation;GO:2001214 positive regulation of vasculogenesis
Slc9b2	97086	37.4307	1.08912	0.270055	4.03294	5.50835e-05	0.00316826	solute carrier family 9, subfamily B (NHA2, cation proton antiporter 2), member 2	GO:2001206 positive regulation of osteoclast development;GO:2001204 regulation of osteoclast development;GO:0072583 clathrin-dependent endocytosis
Cxcl12	20315	166.942	1.08611	0.255361	4.25325	2.10692e-05	0.00151609	chemokine (C-X-C motif) ligand 12	GO:1903237 negative regulation of leukocyte tethering or rolling;GO:0038146 chemokine (C-X-C motif) ligand 12 signaling pathway;GO:1904995 negative regulation of leukocyte adhesion to vascular endothelial cell
Akr1c18	105349	22.2512	1.08487	0.261336	4.15127	3.30641e-05	0.00214168	aldo-keto reductase family 1, member C18	GO:0006709 progesterone catabolic process;GO:0008208 C21-steroid hormone catabolic process;GO:0120256 olefinic compound catabolic process
Csrp2	13008	728.256	1.08206	0.185668	5.82791	5.61271e-09	2.26687e-06	cysteine and glycine-rich protein 2	GO:0045214 sarcomere organization;GO:0030239 myofibril assembly;GO:0055002 striated muscle cell development
Tent5a	212943	121.293	1.07909	0.239311	4.50913	6.5093e-06	0.0006183	terminal nucleotidyltransferase 5A	GO:0030501 positive regulation of bone mineralization;GO:0070169 positive regulation of biomineral tissue development;GO:0048255 mRNA stabilization
Fst	14313	94.1109	1.07399	0.258185	4.15977	3.1857e-05	0.00209311	follistatin	GO:0036305 ameloblast differentiation;GO:0051798 positive regulation of hair follicle development;GO:0032926 negative regulation of activin receptor signaling pathway
Col12a1	12816	543.811	1.06472	0.264301	4.02844	5.6147e-05	0.00319921	collagen, type XII, alpha 1	GO:0035987 endodermal cell differentiation;GO:0001706 endoderm formation;GO:0007492 endoderm development
Sod3	20657	165.458	1.06022	0.23512	4.50927	6.50506e-06	0.0006183	superoxide dismutase 3, extracellular	GO:0019430 removal of superoxide radicals;GO:0071450 cellular response to oxygen radical;GO:0071451 cellular response to superoxide
Plac8	231507	388.813	1.05545	0.194957	5.41377	6.17106e-08	1.54074e-05	placenta-specific 8	GO:0040015 negative regulation of multicellular organism growth;GO:0050873 brown fat cell differentiation;GO:0009409 response to cold
Adamtsl1	77739	17.0471	1.05018	0.256698	4.0911	4.29337e-05	0.00262029	ADAMTS-like 1	GO:0030198 extracellular matrix organization;GO:0043062 extracellular structure organization;GO:0045229 external encapsulating structure organization
Sspn	16651	36.0144	1.04541	0.269573	3.87803	0.000105306	0.00522042	sarcospan
Sel1l3	231238	53.5409	1.0433	0.260022	4.01237	6.01122e-05	0.00335607	sel-1 suppressor of lin-12-like 3 (C. elegans)	GO:0008150 biological_process
Cstdc4	433016	62.8364	1.04147	0.269396	3.86595	0.000110656	0.00538841	cystatin domain containing 4	GO:0018149 peptide cross-linking;GO:0030216 keratinocyte differentiation;GO:0009913 epidermal cell differentiation
Mfap4	76293	284.052	1.04146	0.235016	4.43143	9.36099e-06	0.000825163	microfibrillar-associated protein 4	GO:0071493 cellular response to UV-B;GO:0009650 UV protection;GO:0001867 complement activation, lectin pathway
Mt3	17751	14.6571	1.03994	0.247066	4.20916	2.56325e-05	0.00175993	metallothionein 3	GO:2000296 negative regulation of hydrogen peroxide catabolic process;GO:2000376 positive regulation of oxygen metabolic process;GO:0097214 positive regulation of lysosomal membrane permeability
Mmp2	17390	949.395	1.03639	0.256113	4.04662	5.19625e-05	0.00302484	matrix metallopeptidase 2	GO:0014012 peripheral nervous system axon regeneration;GO:0001957 intramembranous ossification;GO:0036072 direct ossification
Barx2	12023	31.2809	1.0303	0.267295	3.85454	0.000115945	0.00550921	BarH-like homeobox 2	GO:0042637 catagen;GO:0044851 hair cycle phase;GO:0001502 cartilage condensation
Serping1	12258	523.509	1.02895	0.269958	3.81153	0.00013811	0.00617761	serine (or cysteine) peptidase inhibitor, clade G, member 1	GO:0001868 regulation of complement activation, lectin pathway;GO:0001869 negative regulation of complement activation, lectin pathway;GO:0042730 fibrinolysis
Pgap6	60455	239.294	1.02112	0.202768	5.0359	4.756e-07	7.59411e-05	post-glycosylphosphatidylinositol attachment to proteins 6	GO:0006629 lipid metabolic process;GO:0044238 primary metabolic process;GO:0071704 organic substance metabolic process
Brinp3	215378	17.5179	1.01851	0.250822	4.06067	4.8932e-05	0.00289627	bone morphogenetic protein/retinoic acid inducible neural specific 3	GO:0071300 cellular response to retinoic acid;GO:0032526 response to retinoic acid;GO:0045666 positive regulation of neuron differentiation
Marcks	17118	528.347	1.01812	0.178727	5.69653	1.2227e-08	4.09514e-06	myristoylated alanine rich protein kinase C substrate	GO:0031584 activation of phospholipase D activity;GO:1905274 regulation of modification of postsynaptic actin cytoskeleton;GO:1900019 regulation of protein kinase C activity
Pamr1	210622	24.8934	1.01394	0.240407	4.21759	2.46932e-05	0.00171256	peptidase domain containing associated with muscle regeneration 1	GO:0006508 proteolysis;GO:0019538 protein metabolic process;GO:1901564 organonitrogen compound metabolic process
Slc40a1	53945	228.474	1.00957	0.247525	4.07864	4.52999e-05	0.00272832	solute carrier family 40 (iron-regulated transporter), member 1	GO:0060345 spleen trabecula formation;GO:1903988 iron ion export across plasma membrane;GO:0034395 regulation of transcription from RNA polymerase II promoter in response to iron
Chrna1os	100504117	73.5852	1.00941	0.259828	3.88491	0.000102369	0.00509321	cholinergic receptor, nicotinic, alpha polypeptide 1 (muscle), opposite strand	GO:0008150 biological_process
Ednrb	13618	261.04	1.00694	0.23832	4.22515	2.38782e-05	0.00167293	endothelin receptor type B	GO:0007497 posterior midgut development;GO:0035645 enteric smooth muscle cell differentiation;GO:0002001 renin secretion into blood stream
Ackr3	12778	376.278	1.00311	0.197254	5.08538	3.66886e-07	6.29761e-05	atypical chemokine receptor 3	GO:1905320 regulation of mesenchymal stem cell migration;GO:1905322 positive regulation of mesenchymal stem cell migration;GO:0021557 oculomotor nerve development
Slpi	20568	239.271	1.00281	0.237648	4.21974	2.4458e-05	0.00170486	secretory leukocyte peptidase inhibitor	GO:0045071 negative regulation of viral genome replication;GO:0035821 modulation of process of another organism;GO:0045069 regulation of viral genome replication
Scn7a	20272	48.0609	1.00157	0.269955	3.71013	0.000207154	0.00817093	sodium channel, voltage-gated, type VII, alpha	GO:0086010 membrane depolarization during action potential;GO:0055078 sodium ion homeostasis;GO:0019228 neuronal action potential
Mrc1	17533	2793.5	1.00126	0.213112	4.6983	2.62335e-06	0.000305286	mannose receptor, C type 1	GO:0071353 cellular response to interleukin-4;GO:0070670 response to interleukin-4;GO:0071346 cellular response to interferon-gamma
Rnase4	58809	899.689	0.999444	0.182383	5.47992	4.25508e-08	1.10247e-05	ribonuclease, RNase A family 4	GO:0090501 RNA phosphodiester bond hydrolysis;GO:0090305 nucleic acid phosphodiester bond hydrolysis;GO:0009267 cellular response to starvation
C130074G19Rik	226777	137.49	0.999321	0.236147	4.23177	2.31858e-05	0.00164968	RIKEN cDNA C130074G19 gene	GO:0008150 biological_process
Sox11	20666	36.3638	0.995943	0.267814	3.71879	0.000200177	0.00799081	SRY (sex determining region Y)-box 11	GO:0061386 closure of optic fissure;GO:2001109 regulation of lens epithelial cell proliferation;GO:2001111 positive regulation of lens epithelial cell proliferation
AA465934	613254	35.8326	0.994328	0.270115	3.68113	0.000232206	0.00883283	expressed sequence AA465934	GO:0008150 biological_process
Rpl34-ps2	623174	70.6668	0.9933	0.258272	3.84595	0.000120088	0.00563351	ribosomal protein L34, pseudogene 2
Olfml1	244198	21.3838	0.993293	0.261191	3.80294	0.000142986	0.00631347	olfactomedin-like 1	GO:0007165 signal transduction;GO:0023052 signaling;GO:0007154 cell communication
Grem2	23893	22.9198	0.983608	0.257101	3.82577	0.000130364	0.00586868	gremlin 2, DAN family BMP antagonist	GO:0060300 regulation of cytokine activity;GO:0038098 sequestering of BMP from receptor via BMP binding;GO:0048263 determination of dorsal identity
Cd36	12491	353.665	0.982946	0.218327	4.50218	6.72596e-06	0.00062406	CD36 molecule	GO:0070543 response to linoleic acid;GO:0150024 oxidised low-density lipoprotein particle clearance;GO:0015912 short-chain fatty acid transport
Pdpn	14726	768.939	0.978915	0.193951	5.04722	4.48289e-07	7.24224e-05	podoplanin	GO:1904328 regulation of myofibroblast contraction;GO:0060838 lymphatic endothelial cell fate commitment;GO:0060839 endothelial cell fate commitment
Pmp22	18858	607.595	0.972676	0.187456	5.18882	2.11628e-07	4.2117e-05	peripheral myelin protein 22	GO:0007618 mating;GO:0098529 neuromuscular junction development, skeletal muscle fiber;GO:0036135 Schwann cell migration
Timp1	21857	1132.1	0.971665	0.206482	4.70581	2.52861e-06	0.000296777	tissue inhibitor of metalloproteinase 1	GO:1901164 negative regulation of trophoblast cell migration;GO:0002248 connective tissue replacement involved in inflammatory response wound healing;GO:1905049 negative regulation of metallopeptidase activity
Bicc1	83675	46.6908	0.970758	0.269499	3.60208	0.000315682	0.0111438	BicC family RNA binding protein 1	GO:0007368 determination of left/right symmetry;GO:0009855 determination of bilateral symmetry;GO:0009799 specification of symmetry
Gsta4	14860	165.399	0.969979	0.251999	3.84914	0.000118534	0.00561278	glutathione S-transferase, alpha 4	GO:0006749 glutathione metabolic process;GO:0006805 xenobiotic metabolic process;GO:0071466 cellular response to xenobiotic stimulus
Gas6	14456	936.538	0.967051	0.21525	4.49268	7.03311e-06	0.000648179	growth arrest specific 6	GO:1900142 negative regulation of oligodendrocyte apoptotic process;GO:1900141 regulation of oligodendrocyte apoptotic process;GO:0003104 positive regulation of glomerular filtration
Adam12	11489	82.4044	0.962947	0.269583	3.57198	0.000354289	0.0121932	a disintegrin and metallopeptidase domain 12 (meltrin alpha)	GO:0045766 positive regulation of angiogenesis;GO:1904018 positive regulation of vasculature development;GO:0045765 regulation of angiogenesis
Sbsn	282619	93.9093	0.961224	0.255718	3.75891	0.000170652	0.00708944	suprabasin	GO:0008150 biological_process
Gfra4	14588	32.0776	0.959161	0.270079	3.55141	0.000383168	0.0128169	glial cell line derived neurotrophic factor family receptor alpha 4	GO:0030279 negative regulation of ossification;GO:0030278 regulation of ossification;GO:0001503 ossification
Snhg10	69434	57.3994	0.958398	0.255838	3.74611	0.000179598	0.00731822	small nucleolar RNA host gene 10	GO:0008150 biological_process
Sox4	20677	1425.46	0.957759	0.182264	5.25479	1.48191e-07	3.03724e-05	SRY (sex determining region Y)-box 4	GO:2000759 regulation of N-terminal peptidyl-lysine acetylation;GO:2000761 positive regulation of N-terminal peptidyl-lysine acetylation;GO:0035910 ascending aorta morphogenesis
Klra4	16635	191.832	0.957225	0.237465	4.03101	5.55371e-05	0.00317765	killer cell lectin-like receptor, subfamily A, member 4	GO:0007155 cell adhesion;GO:0009987 cellular process;GO:0008150 biological_process
Wnt2	22413	29.7601	0.955148	0.270122	3.53599	0.000406254	0.0133781	wingless-type MMTV integration site family, member 2	GO:0060492 lung induction;GO:1904954 canonical Wnt signaling pathway involved in midbrain dopaminergic neuron differentiation;GO:0060502 epithelial cell proliferation involved in lung morphogenesis
Slc16a2	20502	35.7468	0.953916	0.265357	3.59484	0.000324592	0.0113417	solute carrier family 16 (monocarboxylic acid transporters), member 2	GO:0070460 thyroid-stimulating hormone secretion;GO:0070327 thyroid hormone transport;GO:0006590 thyroid hormone generation
Rps27a-ps3	667035	1864.15	0.951579	0.193567	4.91601	8.83241e-07	0.00012767	ribosomal protein S27A, pseudogene 3
Cygb	114886	220.101	0.948924	0.247316	3.8369	0.000124599	0.00576093	cytoglobin	GO:2000490 negative regulation of hepatic stellate cell activation;GO:0015671 oxygen transport;GO:0010764 negative regulation of fibroblast migration
Ifi205	226695	100.628	0.948366	0.252354	3.75808	0.000171221	0.00708944	interferon activated gene 205	GO:0035458 cellular response to interferon-beta;GO:0002218 activation of innate immune response;GO:0032731 positive regulation of interleukin-1 beta production
Mgp	17313	155.518	0.941295	0.265194	3.54946	0.000386027	0.0128663	matrix Gla protein	GO:0030500 regulation of bone mineralization;GO:0070167 regulation of biomineral tissue development;GO:0110149 regulation of biomineralization
Rpl41	67945	30681.9	0.939089	0.182196	5.15428	2.54612e-07	4.66178e-05	ribosomal protein L41	GO:0002181 cytoplasmic translation;GO:0006412 translation;GO:0043043 peptide biosynthetic process
Cpz	242939	18.5276	0.936356	0.256801	3.64623	0.000266116	0.0097448	carboxypeptidase Z	GO:0016485 protein processing;GO:0016055 Wnt signaling pathway;GO:0198738 cell-cell signaling by wnt
Rpl17-ps10	100042880	322.247	0.935707	0.218453	4.28333	1.8412e-05	0.0013741	ribosomal protein L17, pseudogene 10
Gem	14579	21.3832	0.934006	0.264142	3.536	0.000406228	0.0133781	GTP binding protein (gene overexpressed in skeletal muscle)	GO:1901842 negative regulation of high voltage-gated calcium channel activity;GO:1901841 regulation of high voltage-gated calcium channel activity;GO:1901386 negative regulation of voltage-gated calcium channel activity
Cd302	66205	208.792	0.926403	0.217748	4.25448	2.09535e-05	0.00151609	CD302 antigen	GO:0006909 phagocytosis;GO:0016192 vesicle-mediated transport;GO:0006810 transport
ND6	17722	5294.64	0.92083	0.205882	4.4726	7.72729e-06	0.0006981	NADH dehydrogenase subunit 6	GO:0006120 mitochondrial electron transport, NADH to ubiquinone;GO:0019646 aerobic electron transport chain;GO:0010257 NADH dehydrogenase complex assembly
Gm10736	100504654	5641.73	0.914667	0.181957	5.02684	4.98633e-07	7.78094e-05	predicted gene 10736
Car9	230099	151.66	0.914503	0.263823	3.46635	0.000527583	0.0160282	carbonic anhydrase 9	GO:0006730 one-carbon metabolic process;GO:0002009 morphogenesis of an epithelium;GO:0046903 secretion
Ddx3y	26900	175.281	0.913843	0.211143	4.32807	1.50423e-05	0.0011837	DEAD box helicase 3, Y-linked	GO:0007276 gamete generation;GO:0048609 multicellular organismal reproductive process;GO:0019953 sexual reproduction
F13a1	74145	2476.26	0.911676	0.1805	5.05082	4.39907e-07	7.24224e-05	coagulation factor XIII, A1 subunit	GO:0072378 blood coagulation, fibrin clot formation;GO:0072376 protein activation cascade;GO:0018149 peptide cross-linking
Crip1	12925	2469.29	0.90867	0.191229	4.75174	2.01669e-06	0.000256418	cysteine-rich protein 1 (intestinal)	GO:0071493 cellular response to UV-B;GO:0071236 cellular response to antibiotic;GO:0010224 response to UV-B
Gm2830	100040543	779.624	0.906577	0.224039	4.04652	5.19854e-05	0.00302484	predicted gene 2830
Mageh1	75625	33.4199	0.901738	0.269528	3.34562	0.000821	0.0221929	MAGE family member H1	GO:0000122 negative regulation of transcription by RNA polymerase II;GO:0045892 negative regulation of DNA-templated transcription;GO:1903507 negative regulation of nucleic acid-templated transcription
Snhg7	72091	256.92	0.899431	0.192856	4.66374	3.10508e-06	0.000350641	small nucleolar RNA host gene 7	GO:0008150 biological_process
Mcpt2	17225	21.7335	0.898221	0.24779	3.62493	0.000289039	0.0103631	mast cell protease 2	GO:0006508 proteolysis;GO:0019538 protein metabolic process;GO:1901564 organonitrogen compound metabolic process
Efna5	13640	133.239	0.897614	0.220836	4.06462	4.81098e-05	0.00287236	ephrin A5	GO:0071372 cellular response to follicle-stimulating hormone stimulus;GO:0032354 response to follicle-stimulating hormone;GO:0048672 positive regulation of collateral sprouting
Papss2	23972	35.0079	0.887991	0.269323	3.29713	0.000976788	0.0252153	3'-phosphoadenosine 5'-phosphosulfate synthase 2	GO:0034036 purine ribonucleoside bisphosphate biosynthetic process;GO:0050428 3'-phosphoadenosine 5'-phosphosulfate biosynthetic process;GO:0000103 sulfate assimilation	yes
Chga	12652	88.4781	0.885038	0.27012	3.27647	0.00105115	0.0265537	chromogranin A	GO:0086030 adenylate cyclase-activating adrenergic receptor signaling pathway involved in cardiac muscle relaxation;GO:1901899 positive regulation of relaxation of cardiac muscle;GO:2000707 positive regulation of dense core granule biogenesis
Islr	26968	313.24	0.880996	0.228244	3.85989	0.00011344	0.00548506	immunoglobulin superfamily containing leucine-rich repeat
Cmah	12763	25.4807	0.880268	0.267956	3.28513	0.00101937	0.0258941	cytidine monophospho-N-acetylneuraminic acid hydroxylase	GO:0046381 CMP-N-acetylneuraminate metabolic process;GO:0009225 nucleotide-sugar metabolic process;GO:0030111 regulation of Wnt signaling pathway
Aspn	66695	565.308	0.879113	0.204143	4.30636	1.65962e-05	0.00125911	asporin	GO:0070171 negative regulation of tooth mineralization;GO:0070170 regulation of tooth mineralization;GO:0070168 negative regulation of biomineral tissue development
Mgst2	211666	189.866	0.870844	0.218113	3.99263	6.53436e-05	0.00356071	microsomal glutathione S-transferase 2	GO:0006750 glutathione biosynthetic process;GO:0019370 leukotriene biosynthetic process;GO:0019184 nonribosomal peptide biosynthetic process
Cd5l	11801	48.1151	0.868345	0.261523	3.32033	0.000899098	0.0236975	CD5 antigen-like	GO:1903661 positive regulation of complement-dependent cytotoxicity;GO:1903659 regulation of complement-dependent cytotoxicity;GO:0030449 regulation of complement activation
C1s1	50908	495.524	0.865491	0.219554	3.94204	8.07923e-05	0.0041552	complement component 1, s subcomponent 1	GO:0006958 complement activation, classical pathway;GO:0002455 humoral immune response mediated by circulating immunoglobulin;GO:0006956 complement activation
Grb14	50915	75.0625	0.861335	0.252388	3.41274	0.000643131	0.0186318	growth factor receptor bound protein 14	GO:1904145 negative regulation of meiotic cell cycle process involved in oocyte maturation;GO:1903538 regulation of meiotic cell cycle process involved in oocyte maturation;GO:1900194 negative regulation of oocyte maturation
Gm5908	546052	48.2905	0.858184	0.26877	3.193	0.00140801	0.0323667	predicted gene 5908
Cela1	109901	141.003	0.855934	0.255895	3.34487	0.000823218	0.0222091	chymotrypsin-like elastase family, member 1	GO:0060309 elastin catabolic process;GO:0061113 pancreas morphogenesis;GO:0051541 elastin metabolic process
Saa3	20210	800.859	0.852728	0.263493	3.23624	0.00121114	0.0293322	serum amyloid A 3	GO:0007252 I-kappaB phosphorylation;GO:0035634 response to stilbenoid;GO:0006953 acute-phase response
Cdkn1c	12577	34.3709	0.851872	0.260364	3.27186	0.00106844	0.0267734	cyclin-dependent kinase inhibitor 1C (P57)	GO:1902746 regulation of lens fiber cell differentiation;GO:0071514 genomic imprinting;GO:0007096 regulation of exit from mitosis
Enpp1	18605	94.2456	0.849282	0.258449	3.28607	0.00101594	0.0258941	ectonucleotide pyrophosphatase/phosphodiesterase 1	GO:0019634 organic phosphonate metabolic process;GO:0140459 response to Gram-positive bacterium;GO:1904124 microglial cell migration
Ndufa5	68202	1021.34	0.847515	0.191264	4.43113	9.37412e-06	0.000825163	NADH:ubiquinone oxidoreductase subunit A5	GO:0010257 NADH dehydrogenase complex assembly;GO:0032981 mitochondrial respiratory chain complex I assembly;GO:0042776 proton motive force-driven mitochondrial ATP synthesis
Gpc6	23888	120.755	0.846487	0.237771	3.56009	0.000370722	0.0126753	glypican 6	GO:0098696 regulation of neurotransmitter receptor localization to postsynaptic specialization membrane;GO:1902683 regulation of receptor localization to synapse;GO:1902473 regulation of protein localization to synapse
Clec4d	17474	998.808	0.845357	0.203421	4.1557	3.24292e-05	0.00211051	C-type lectin domain family 4, member d	GO:0030887 positive regulation of myeloid dendritic cell activation;GO:0030885 regulation of myeloid dendritic cell activation;GO:0038094 Fc-gamma receptor signaling pathway
Fbn2	14119	17.8326	0.845339	0.241448	3.50112	0.000463305	0.0146255	fibrillin 2	GO:0035583 sequestering of TGFbeta in extracellular matrix;GO:0071694 maintenance of protein location in extracellular region;GO:0035581 sequestering of extracellular ligand from receptor
Atp6v0d2	242341	47.6845	0.843045	0.269754	3.12523	0.00177664	0.0383105	ATPase, H+ transporting, lysosomal V0 subunit D2	GO:0007035 vacuolar acidification;GO:0051452 intracellular pH reduction;GO:1902600 proton transmembrane transport
Gpc3	14734	26.3147	0.840085	0.251199	3.34431	0.000824887	0.0222105	glypican 3	GO:0061209 cell proliferation involved in mesonephros development;GO:0072138 mesenchymal cell proliferation involved in ureteric bud development;GO:0072203 cell proliferation involved in metanephros development
Cfp	18636	1529.87	0.839531	0.173621	4.83543	1.32858e-06	0.000176731	complement factor properdin	GO:0006957 complement activation, alternative pathway;GO:1903028 positive regulation of opsonization;GO:1903027 regulation of opsonization
Cyp1b1	13078	43.1812	0.835492	0.268861	3.10753	0.00188661	0.039507	cytochrome P450, family 1, subfamily b, polypeptide 1	GO:0002930 trabecular meshwork development;GO:0071603 endothelial cell-cell adhesion;GO:0061304 retinal blood vessel morphogenesis
Pygl	110095	280.906	0.834749	0.187077	4.46206	8.11761e-06	0.000728569	liver glycogen phosphorylase	GO:0006015 5-phosphoribose 1-diphosphate biosynthetic process;GO:0046391 5-phosphoribose 1-diphosphate metabolic process;GO:0005980 glycogen catabolic process
Adam23	23792	20.3431	0.834635	0.26379	3.16401	0.00155612	0.0347963	a disintegrin and metallopeptidase domain 23	GO:1990830 cellular response to leukemia inhibitory factor;GO:1990823 response to leukemia inhibitory factor;GO:0007155 cell adhesion
Serpinb2	18788	171.684	0.831056	0.240582	3.45436	0.000551603	0.0166475	serine (or cysteine) peptidase inhibitor, clade B, member 2	GO:0010951 negative regulation of endopeptidase activity;GO:0010466 negative regulation of peptidase activity;GO:0042060 wound healing
Fabp5	16592	359.809	0.828882	0.217723	3.80705	0.000140636	0.00627017	fatty acid binding protein 5, epidermal	GO:0099178 regulation of retrograde trans-synaptic signaling by endocanabinoid;GO:1990379 lipid transport across blood-brain barrier;GO:0035360 positive regulation of peroxisome proliferator activated receptor signaling pathway
Gm11703	100043184	92.8227	0.826366	0.248083	3.331	0.000865332	0.0230721	predicted gene 11703
Ccl9	20308	2395.35	0.825542	0.180724	4.56796	4.92491e-06	0.00051625	chemokine (C-C motif) ligand 9	GO:0045662 negative regulation of myoblast differentiation;GO:0002548 monocyte chemotaxis;GO:0048247 lymphocyte chemotaxis
Snord22	100127111	100.207	0.823514	0.247806	3.32322	0.000889855	0.023499	small nucleolar RNA, C/D box 22	GO:0008150 biological_process
Ly6a	110454	758.189	0.82321	0.190086	4.33073	1.48614e-05	0.00117964	lymphocyte antigen 6 complex, locus A	GO:0095500 acetylcholine receptor signaling pathway;GO:1905145 cellular response to acetylcholine;GO:1905144 response to acetylcholine
Pkdcc	106522	44.4928	0.823016	0.267503	3.07666	0.00209335	0.0419801	protein kinase domain containing, cytoplasmic	GO:0042997 negative regulation of Golgi to plasma membrane protein transport;GO:0042996 regulation of Golgi to plasma membrane protein transport;GO:0032332 positive regulation of chondrocyte differentiation	yes
Cops9	66915	3123.13	0.822934	0.193144	4.26073	2.0376e-05	0.00148831	COP9 signalosome subunit 9	GO:2000435 negative regulation of protein neddylation;GO:2000434 regulation of protein neddylation;GO:0051220 cytoplasmic sequestering of protein
Spon2	100689	51.9845	0.821705	0.269224	3.05212	0.0022723	0.0440724	spondin 2, extracellular matrix protein	GO:0008228 opsonization;GO:0043152 induction of bacterial agglutination;GO:0060907 positive regulation of macrophage cytokine production
Dnm3os	474332	254.814	0.820382	0.218358	3.75706	0.000171921	0.00708956	dynamin 3, opposite strand	GO:0030282 bone mineralization;GO:0031214 biomineral tissue development;GO:0110148 biomineralization
Gm8451	667090	123.261	0.820304	0.239245	3.42872	0.000606439	0.0178704	predicted gene 8451
Ddah1	69219	209.412	0.820118	0.247823	3.30929	0.000935326	0.0244041	dimethylarginine dimethylaminohydrolase 1	GO:0000052 citrulline metabolic process;GO:0017014 protein nitrosylation;GO:0006527 arginine catabolic process
P4ha3	320452	79.6903	0.819448	0.266033	3.08025	0.00206827	0.041797	procollagen-proline, 2-oxoglutarate 4-dioxygenase (proline 4-hydroxylase), alpha polypeptide III	GO:0018401 peptidyl-proline hydroxylation to 4-hydroxy-L-proline;GO:0019511 peptidyl-proline hydroxylation;GO:0018126 protein hydroxylation
Dram1	71712	237.81	0.818186	0.216254	3.78345	0.000154667	0.00663835	DNA-damage regulated autophagy modulator 1	GO:0006914 autophagy;GO:0061919 process utilizing autophagic mechanism;GO:0010506 regulation of autophagy
Itm2a	16431	98.3968	0.8153	0.239777	3.40025	0.000673251	0.019062	integral membrane protein 2A	GO:0002317 plasma cell differentiation;GO:0042985 negative regulation of amyloid precursor protein biosynthetic process;GO:0042984 regulation of amyloid precursor protein biosynthetic process
Tfpi2	21789	25.4792	0.812913	0.266863	3.04618	0.00231766	0.0445947	tissue factor pathway inhibitor 2	GO:0007596 blood coagulation;GO:0050817 coagulation;GO:0007599 hemostasis
Magohb	66441	313.978	0.810061	0.211033	3.83856	0.00012376	0.00575989	mago homolog B, exon junction complex core component	GO:0000184 nuclear-transcribed mRNA catabolic process, nonsense-mediated decay;GO:0006406 mRNA export from nucleus;GO:0006405 RNA export from nucleus
Nucks1	98415	2318.01	0.807753	0.175317	4.60738	4.07765e-06	0.000437455	nuclear casein kinase and cyclin-dependent kinase substrate 1	GO:1990968 modulation by host of RNA binding by virus;GO:1990969 modulation by host of viral RNA-binding transcription factor activity;GO:0043921 modulation by host of viral transcription
Atp5mpl	70257	2749.73	0.807635	0.156447	5.16235	2.43869e-07	4.58741e-05	ATP synthase membrane subunit 6.8PL	GO:0008150 biological_process
Mcoln2	68279	51.1747	0.807161	0.261314	3.08886	0.00200929	0.0408987	mucolipin 2	GO:0071642 positive regulation of macrophage inflammatory protein 1 alpha production;GO:0071651 positive regulation of chemokine (C-C motif) ligand 5 production;GO:0071640 regulation of macrophage inflammatory protein 1 alpha production
Maf	17132	625.311	0.803282	0.178228	4.50704	6.57382e-06	0.0006183	avian musculoaponeurotic fibrosarcoma oncogene homolog	GO:0070306 lens fiber cell differentiation;GO:0032330 regulation of chondrocyte differentiation;GO:0061035 regulation of cartilage development
Prg4	96875	330.42	0.797267	0.227327	3.50713	0.000452962	0.0144317	proteoglycan 4 (megakaryocyte stimulating factor, articular superficial zone protein)	GO:0071425 hematopoietic stem cell proliferation;GO:0032635 interleukin-6 production;GO:0032715 negative regulation of interleukin-6 production
Sfrp2	20319	216.624	0.796003	0.234034	3.40123	0.00067083	0.019062	secreted frizzled-related protein 2	GO:0061185 negative regulation of dermatome development;GO:0045992 negative regulation of embryonic development;GO:0042662 negative regulation of mesodermal cell fate specification
AW551984	244810	22.5627	0.795281	0.252138	3.15415	0.00160965	0.0355938	expressed sequence AW551984	GO:0060923 cardiac muscle cell fate commitment;GO:0042693 muscle cell fate commitment;GO:0060911 cardiac cell fate commitment
Eif2s3y	26908	124.45	0.795197	0.232836	3.41526	0.000637209	0.0184993	eukaryotic translation initiation factor 2, subunit 3, structural gene Y-linked	GO:0045903 positive regulation of translational fidelity;GO:0006450 regulation of translational fidelity;GO:0001731 formation of translation preinitiation complex
Podn	242608	24.4758	0.792169	0.262714	3.01533	0.00256701	0.0478942	podocan	GO:0030336 negative regulation of cell migration;GO:2000146 negative regulation of cell motility;GO:0040013 negative regulation of locomotion
Nr2c2ap	75692	270.635	0.785234	0.230681	3.40398	0.00066411	0.0189991	nuclear receptor 2C2-associated protein
Atp5h	71679	3808.24	0.783678	0.178117	4.3998	1.08349e-05	0.000918426	ATP synthase, H+ transporting, mitochondrial F0 complex, subunit D	GO:0042776 proton motive force-driven mitochondrial ATP synthesis;GO:0015986 proton motive force-driven ATP synthesis;GO:0006754 ATP biosynthetic process
Hddc2	69692	547.642	0.782955	0.189097	4.14048	3.46574e-05	0.00222391	HD domain containing 2
Snhg20	76972	393.526	0.782746	0.220198	3.55473	0.000378368	0.0127829	small nucleolar RNA host gene 20	GO:0007260 tyrosine phosphorylation of STAT protein;GO:0071398 cellular response to fatty acid;GO:0070542 response to fatty acid
Cd200r1	57781	70.9876	0.781332	0.2506	3.11784	0.00182179	0.0390887	CD200 receptor 1	GO:2000405 negative regulation of T cell migration;GO:1905522 negative regulation of macrophage migration;GO:2000402 negative regulation of lymphocyte migration
Msrb3	320183	101.921	0.778514	0.254013	3.06486	0.00217772	0.0430281	methionine sulfoxide reductase B3	GO:0030091 protein repair;GO:0006979 response to oxidative stress;GO:0006950 response to stress
Gm5576	434050	178.811	0.776944	0.218579	3.55452	0.00037867	0.0127829	predicted pseudogene 5576
Cbr2	12409	1250.46	0.776202	0.203972	3.80543	0.00014156	0.00627496	carbonyl reductase 2	GO:0005997 xylulose metabolic process;GO:0006116 NADH oxidation;GO:0019321 pentose metabolic process
Eif3j2	100042807	233.743	0.77284	0.227242	3.40095	0.000671527	0.019062	eukaryotic translation initiation factor 3, subunit J2
Nfib	18028	471.759	0.77195	0.212865	3.62648	0.000287308	0.010328	nuclear factor I/B	GO:0061141 lung ciliated cell differentiation;GO:2000795 negative regulation of epithelial cell proliferation involved in lung morphogenesis;GO:0021730 trigeminal sensory nucleus development
Larp6	67557	8.5878	0.770544	0.223943	3.44081	0.000579976	0.0172157	La ribonucleoprotein 6, translational regulator	GO:1902416 positive regulation of mRNA binding;GO:1905216 positive regulation of RNA binding;GO:1902415 regulation of mRNA binding
Pdlim4	30794	303.591	0.76711	0.226448	3.38757	0.00070514	0.0197612	PDZ and LIM domain 4	GO:0098976 excitatory chemical synaptic transmission;GO:0051496 positive regulation of stress fiber assembly;GO:0032233 positive regulation of actin filament bundle assembly
Rbm26	100502987	348.919	0.76482	0.229454	3.33321	0.000858487	0.0229353	RNA binding motif protein 26	GO:0006397 mRNA processing;GO:0016071 mRNA metabolic process;GO:0006396 RNA processing
Rpl27a-ps4	432798	170.185	0.763676	0.208357	3.66524	0.000247111	0.00924611	ribosomal protein L27A, pseudogene 4
Gm5148	381438	2382.42	0.759078	0.177683	4.27209	1.93648e-05	0.00142966	predicted gene 5148	GO:0008150 biological_process
Snrpe	20643	3723.66	0.758584	0.166675	4.55129	5.33183e-06	0.000550502	small nuclear ribonucleoprotein E	GO:0000387 spliceosomal snRNP assembly;GO:0022618 ribonucleoprotein complex assembly;GO:0071826 ribonucleoprotein complex subunit organization
Ecrg4	78896	10.3395	0.756885	0.24409	3.10084	0.00192971	0.0400283	ECRG4 augurin precursor	GO:2000854 positive regulation of corticosterone secretion;GO:0030103 vasopressin secretion;GO:0051466 positive regulation of corticotropin-releasing hormone secretion
Atp5l	27425	2871.13	0.755737	0.155193	4.86965	1.11797e-06	0.00015507	ATP synthase, H+ transporting, mitochondrial F0 complex, subunit G	GO:0015986 proton motive force-driven ATP synthesis;GO:0006754 ATP biosynthetic process;GO:0009206 purine ribonucleoside triphosphate biosynthetic process
Sparc	20692	7549.84	0.755397	0.195803	3.85794	0.000114345	0.00549755	secreted acidic cysteine rich glycoprotein	GO:0001937 negative regulation of endothelial cell proliferation;GO:0043473 pigmentation;GO:0016525 negative regulation of angiogenesis
Meg3	17263	114.773	0.75422	0.232069	3.24998	0.00115414	0.0284027	maternally expressed 3	GO:0071514 genomic imprinting;GO:0008340 determination of adult lifespan;GO:0006305 DNA alkylation
Acta2	11475	490.77	0.753815	0.215726	3.49431	0.000475282	0.0149008	actin alpha 2, smooth muscle, aorta	GO:0061874 positive regulation of hepatic stellate cell contraction;GO:0061870 positive regulation of hepatic stellate cell migration;GO:0061873 regulation of hepatic stellate cell contraction
Epb41l4aos	69749	738.86	0.750511	0.19595	3.83011	0.000128086	0.00586293	erythrocyte membrane protein band 4.1 like 4a, opposite strand	GO:0008150 biological_process
Tigd2	68140	194.672	0.749936	0.243659	3.07781	0.00208531	0.0419801	tigger transposable element derived 2	GO:0008150 biological_process
Maged2	80884	243.711	0.74775	0.239725	3.1192	0.00181342	0.0389701	MAGE family member D2	GO:0070294 renal sodium ion absorption;GO:0003096 renal sodium ion transport;GO:0070293 renal absorption
F10	14058	220.287	0.747264	0.208038	3.59196	0.000328201	0.0114387	coagulation factor X	GO:0031638 zymogen activation;GO:0051897 positive regulation of protein kinase B signaling;GO:0007596 blood coagulation
Cyp7b1	13123	16.6913	0.746322	0.246415	3.02871	0.00245596	0.0462624	cytochrome P450, family 7, subfamily b, polypeptide 1	GO:0035754 B cell chemotaxis;GO:0006699 bile acid biosynthetic process;GO:0033147 negative regulation of intracellular estrogen receptor signaling pathway
Tomm7	66169	2356.05	0.74131	0.163821	4.52513	6.03589e-06	0.000608982	translocase of outer mitochondrial membrane 7	GO:1903955 positive regulation of protein targeting to mitochondrion;GO:0098779 positive regulation of mitophagy in response to mitochondrial depolarization;GO:1903749 positive regulation of establishment of protein localization to mitochondrion
Ndufa4	17992	3829.27	0.740124	0.192454	3.84571	0.000120202	0.00563351	Ndufa4, mitochondrial complex associated	GO:1904734 positive regulation of electron transfer activity;GO:1904960 positive regulation of cytochrome-c oxidase activity;GO:1904959 regulation of cytochrome-c oxidase activity
Bcat1	12035	1111.76	0.737594	0.16344	4.51294	6.39348e-06	0.000618277	branched chain aminotransferase 1, cytosolic	GO:0009098 leucine biosynthetic process;GO:0009099 valine biosynthetic process;GO:0009082 branched-chain amino acid biosynthetic process
2810001G20Rik	66456	135.34	0.735661	0.228367	3.2214	0.00127564	0.0302018	RIKEN cDNA 2810001G20 gene	GO:0008150 biological_process
Ascl2	17173	11.4097	0.733792	0.226209	3.24387	0.00117918	0.0288124	achaete-scute family bHLH transcription factor 2	GO:0060708 spongiotrophoblast differentiation;GO:0010626 negative regulation of Schwann cell proliferation;GO:0010624 regulation of Schwann cell proliferation
Anp32a	11737	7108.84	0.732883	0.161186	4.54682	5.44615e-06	0.000558108	acidic (leucine-rich) nuclear phosphoprotein 32 family, member A	GO:0006913 nucleocytoplasmic transport;GO:0051169 nuclear transport;GO:0046907 intracellular transport
Acp5	11433	370.329	0.731222	0.236742	3.08869	0.00201039	0.0408987	acid phosphatase 5, tartrate resistant	GO:0032929 negative regulation of superoxide anion generation;GO:0032615 interleukin-12 production;GO:0010936 negative regulation of macrophage cytokine production
Sec61g	20335	1807.38	0.728795	0.161812	4.50396	6.66972e-06	0.000623052	SEC61, gamma subunit	GO:0031204 post-translational protein targeting to membrane, translocation;GO:0006620 post-translational protein targeting to endoplasmic reticulum membrane;GO:0045047 protein targeting to ER
Ccl12	20293	389.131	0.723233	0.208247	3.47296	0.000514747	0.0157428	chemokine (C-C motif) ligand 12	GO:2000502 negative regulation of natural killer cell chemotaxis;GO:1901624 negative regulation of lymphocyte chemotaxis;GO:2000501 regulation of natural killer cell chemotaxis
Celf2	14007	191.373	0.722382	0.203274	3.55373	0.000379802	0.0127829	CUGBP, Elav-like family member 2	GO:0006376 mRNA splice site selection;GO:0000245 spliceosomal complex assembly;GO:0000381 regulation of alternative mRNA splicing, via spliceosome
Slc10a6	75750	20.7093	0.722105	0.231809	3.11508	0.00183895	0.0391511	solute carrier family 10 (sodium/bile acid cotransporter family), member 6	GO:0043251 sodium-dependent organic anion transport;GO:0015721 bile acid and bile salt transport;GO:0015718 monocarboxylic acid transport
Dpysl2	12934	758.278	0.71992	0.196026	3.67258	0.000240114	0.00903356	dihydropyrimidinase-like 2	GO:0014049 positive regulation of glutamate secretion;GO:0014048 regulation of glutamate secretion;GO:0051957 positive regulation of amino acid transport
Rpl21	19933	8287.3	0.719443	0.185565	3.87703	0.000105737	0.00522297	ribosomal protein L21	GO:0002181 cytoplasmic translation;GO:0006412 translation;GO:0043043 peptide biosynthetic process
Pet100	100503890	755.165	0.718626	0.175638	4.09151	4.28574e-05	0.00262029	PET100 homolog	GO:0033617 mitochondrial cytochrome c oxidase assembly;GO:0008535 respiratory chain complex IV assembly;GO:0017004 cytochrome complex assembly
Atp5e	67126	4989.59	0.71761	0.205457	3.49274	0.000478083	0.0149545	ATP synthase, H+ transporting, mitochondrial F1 complex, epsilon subunit	GO:0042776 proton motive force-driven mitochondrial ATP synthesis;GO:0015986 proton motive force-driven ATP synthesis;GO:0006754 ATP biosynthetic process
Tmem256	69186	1327.08	0.717405	0.180575	3.9729	7.10023e-05	0.00380861	transmembrane protein 256	GO:0008150 biological_process
Lockd	381822	375.754	0.709863	0.219061	3.24048	0.0011933	0.0290464	lncRNA downstream of Cdkn1b	GO:0008150 biological_process
Smagp	207818	118.754	0.709227	0.230499	3.07692	0.00209151	0.0419801	small cell adhesion glycoprotein
Dcstamp	75766	9.49287	0.709064	0.217774	3.25597	0.00113006	0.0279604	dendrocyte expressed seven transmembrane protein	GO:0034241 positive regulation of macrophage fusion;GO:0034239 regulation of macrophage fusion;GO:0072675 osteoclast fusion
Cnrip1	380686	123.232	0.706906	0.226806	3.11678	0.00182836	0.0391511	cannabinoid receptor interacting protein 1	GO:2000272 negative regulation of signaling receptor activity;GO:0010469 regulation of signaling receptor activity;GO:0044092 negative regulation of molecular function
Llph-ps2	100043002	94.73	0.702964	0.234661	2.99565	0.0027386	0.0498098	LLP homolog, pseudogene 2
Hpse	15442	244.417	0.700861	0.226639	3.09241	0.00198535	0.0408127	heparanase	GO:0002542 Factor XII activation;GO:0002353 plasma kallikrein-kinin cascade;GO:0002254 kinin cascade
Iftap	68170	215.567	0.700648	0.209415	3.34574	0.000820639	0.0221929	intraflagellar transport associated protein	GO:0007340 acrosome reaction;GO:0007338 single fertilization;GO:0009566 fertilization
Sem1	20422	4694.36	0.693857	0.178553	3.886	0.000101909	0.00509321	SEM1, 26S proteasome complex subunit	GO:0043248 proteasome assembly;GO:0006406 mRNA export from nucleus;GO:0006405 RNA export from nucleus
Gadd45g	23882	370.639	0.691813	0.215532	3.20979	0.0013283	0.0310165	growth arrest and DNA-damage-inducible 45 gamma	GO:0045063 T-helper 1 cell differentiation;GO:0042088 T-helper 1 type immune response;GO:1900745 positive regulation of p38MAPK cascade
Glipr2	384009	638.295	0.687788	0.185168	3.71441	0.000203682	0.00808369	GLI pathogenesis-related 2	GO:0010718 positive regulation of epithelial to mesenchymal transition;GO:0010717 regulation of epithelial to mesenchymal transition;GO:0010634 positive regulation of epithelial cell migration
Mrpl33	66845	2716.36	0.68664	0.164588	4.17186	3.0212e-05	0.00201554	mitochondrial ribosomal protein L33	GO:0032543 mitochondrial translation;GO:0140053 mitochondrial gene expression;GO:0006412 translation
2700099C18Rik	77022	202.596	0.685148	0.217476	3.15046	0.00163016	0.0359894	NDC80 homolog, kinetochore complex component pseudogene
Zfas1	68949	4157.46	0.68495	0.16668	4.10936	3.96759e-05	0.00249922	zinc finger, NFX1-type containing 1, antisense RNA 1	GO:1903611 negative regulation of calcium-dependent ATPase activity;GO:1903610 regulation of calcium-dependent ATPase activity;GO:0033600 negative regulation of mammary gland epithelial cell proliferation
H3f3c	625328	374.493	0.68355	0.18648	3.66554	0.000246818	0.00924611	H3 histone, family 3C
Pdgfrl	68797	10.2044	0.682913	0.222163	3.07393	0.00211262	0.042046	platelet-derived growth factor receptor-like	GO:0008150 biological_process
Gda	14544	927.976	0.682674	0.170144	4.01233	6.01219e-05	0.00335607	guanine deaminase	GO:0006147 guanine catabolic process;GO:0006145 purine nucleobase catabolic process;GO:0006161 deoxyguanosine catabolic process
Rpl27a	26451	18676.4	0.67996	0.154484	4.40147	1.07518e-05	0.000917038	ribosomal protein L27A	GO:0002181 cytoplasmic translation;GO:0006412 translation;GO:0043043 peptide biosynthetic process
Romo1	67067	2079.78	0.675077	0.179586	3.75907	0.000170546	0.00708944	reactive oxygen species modulator 1	GO:0051838 cytolysis by host of symbiont cells;GO:0045039 protein insertion into mitochondrial inner membrane;GO:0090399 replicative senescence
Snhg6	73824	1625.45	0.671015	0.16474	4.07319	4.6374e-05	0.00278082	small nucleolar RNA host gene 6	GO:0008150 biological_process
Arhgdib	11857	2512.65	0.669727	0.178222	3.75782	0.000171402	0.00708944	Rho, GDP dissociation inhibitor (GDI) beta	GO:1901164 negative regulation of trophoblast cell migration;GO:1901163 regulation of trophoblast cell migration;GO:2000249 regulation of actin cytoskeleton reorganization
Ralgps2	78255	167.954	0.669554	0.207968	3.21951	0.00128412	0.0303503	Ral GEF with PH domain and SH3 binding motif 2	GO:0032485 regulation of Ral protein signal transduction;GO:0007265 Ras protein signal transduction;GO:0046578 regulation of Ras protein signal transduction
Txn1	22166	15900.7	0.668673	0.161645	4.13667	3.52389e-05	0.0022507	thioredoxin 1	GO:2000170 positive regulation of peptidyl-cysteine S-nitrosylation;GO:0046826 negative regulation of protein export from nucleus;GO:2000169 regulation of peptidyl-cysteine S-nitrosylation
Ftl1	14325	12407.4	0.663839	0.159338	4.16623	3.09678e-05	0.00204447	ferritin light polypeptide 1	GO:0006880 intracellular sequestering of iron ion;GO:0097577 sequestering of iron ion;GO:0051238 sequestering of metal ion
Pla2g12a	66350	551.55	0.662751	0.195457	3.39077	0.000696966	0.0196524	phospholipase A2, group XIIA	GO:0050482 arachidonic acid secretion;GO:1903963 arachidonate transport;GO:0032309 icosanoid secretion
Polr2l	66491	571.71	0.65982	0.199411	3.30885	0.000936814	0.0244041	polymerase (RNA) II (DNA directed) polypeptide L	GO:0009304 tRNA transcription;GO:0042797 tRNA transcription by RNA polymerase III;GO:0006360 transcription by RNA polymerase I
Ing2	69260	401.85	0.659048	0.208219	3.16517	0.00154993	0.0347204	inhibitor of growth family, member 2	GO:0048133 male germ-line stem cell asymmetric division;GO:0042078 germ-line stem cell division;GO:0098722 asymmetric stem cell division
Sap30	60406	631.359	0.656101	0.188698	3.47699	0.000507073	0.0155775	sin3 associated polypeptide	GO:0052472 modulation by host of symbiont transcription;GO:1902455 negative regulation of stem cell population maintenance;GO:1902459 positive regulation of stem cell population maintenance
Tmem263	103266	716.324	0.654559	0.170557	3.83777	0.000124157	0.00575989	transmembrane protein 263	GO:0008150 biological_process
Ifi27l2a	76933	515.691	0.654186	0.191838	3.41009	0.000649424	0.0187638	interferon, alpha-inducible protein 27 like 2A	GO:0007568 aging;GO:0009615 response to virus;GO:0097190 apoptotic signaling pathway
Srp9	27058	3089.37	0.654116	0.172135	3.80001	0.000144691	0.00636824	signal recognition particle 9	GO:0045900 negative regulation of translational elongation;GO:0006614 SRP-dependent cotranslational protein targeting to membrane;GO:0006448 regulation of translational elongation
Ccdc34	68201	897.647	0.653187	0.189839	3.44074	0.000580127	0.0172157	coiled-coil domain containing 34	GO:0008150 biological_process
Rhox2h	622301	1572.19	0.651676	0.164481	3.96202	7.43182e-05	0.00393824	reproductive homeobox 2H	GO:0008150 biological_process
Dbi	13167	2383	0.650403	0.16801	3.87122	0.000108293	0.00531102	diazepam binding inhibitor	GO:1905918 regulation of CoA-transferase activity;GO:1905920 positive regulation of CoA-transferase activity;GO:1903060 negative regulation of protein lipidation
Folr2	14276	624.353	0.648182	0.169406	3.8262	0.000130139	0.00586868	folate receptor 2 (fetal)	GO:1904447 folate import across plasma membrane;GO:0015884 folic acid transport;GO:0098838 folate transmembrane transport
Mrpl13	68537	2047.42	0.646423	0.161774	3.99583	6.44679e-05	0.00352699	mitochondrial ribosomal protein L13	GO:0032543 mitochondrial translation;GO:0140053 mitochondrial gene expression;GO:0017148 negative regulation of translation
Sec61b	66212	2768.43	0.644052	0.166687	3.86383	0.000111624	0.00541635	Sec61 beta subunit	GO:0031204 post-translational protein targeting to membrane, translocation;GO:0006616 SRP-dependent cotranslational protein targeting to membrane, translocation;GO:0030970 retrograde protein transport, ER to cytosol
1700025G04Rik	69399	457.108	0.642106	0.176929	3.62918	0.000284322	0.0102475	RIKEN cDNA 1700025G04 gene	GO:0008150 biological_process
S100a16	67860	599.764	0.639923	0.213701	2.99448	0.00274913	0.0499353	S100 calcium binding protein A16	GO:0051592 response to calcium ion;GO:0010038 response to metal ion;GO:0010035 response to inorganic substance
Gm15772	100034726	1793.9	0.638909	0.172923	3.69476	0.000220099	0.00861082	ribosomal protein L26 pseudogene
Dpm3	68563	844.184	0.637471	0.178013	3.58103	0.000342248	0.0118382	dolichyl-phosphate mannosyltransferase polypeptide 3	GO:0006506 GPI anchor biosynthetic process;GO:0006505 GPI anchor metabolic process;GO:0009247 glycolipid biosynthetic process
Eloc	67923	2881.46	0.636904	0.159066	4.00403	6.22712e-05	0.00344802	elongin C	GO:0032968 positive regulation of transcription elongation by RNA polymerase II;GO:0006367 transcription initiation at RNA polymerase II promoter;GO:0032786 positive regulation of DNA-templated transcription, elongation
Ndufc2	68197	1797.79	0.636427	0.164312	3.87329	0.000107378	0.00528498	NADH:ubiquinone oxidoreductase subunit C2	GO:2001171 positive regulation of ATP biosynthetic process;GO:0010918 positive regulation of mitochondrial membrane potential;GO:1903427 negative regulation of reactive oxygen species biosynthetic process
Polr2g	67710	1864.43	0.636293	0.151823	4.19102	2.77698e-05	0.00189719	polymerase (RNA) II (DNA directed) polypeptide G	GO:0060213 positive regulation of nuclear-transcribed mRNA poly(A) tail shortening;GO:0060211 regulation of nuclear-transcribed mRNA poly(A) tail shortening;GO:0000291 nuclear-transcribed mRNA catabolic process, exonucleolytic
Zcrb1	67197	1820.6	0.636184	0.180983	3.51517	0.000439472	0.0141663	zinc finger CCHC-type and RNA binding motif 1	GO:0000375 RNA splicing, via transesterification reactions;GO:0000377 RNA splicing, via transesterification reactions with bulged adenosine as nucleophile;GO:0000398 mRNA splicing, via spliceosome
Ctla2b	13025	233.463	0.635215	0.207499	3.06129	0.00220389	0.0433417	cytotoxic T lymphocyte-associated protein 2 beta	GO:0051603 proteolysis involved in protein catabolic process;GO:0030163 protein catabolic process;GO:0009057 macromolecule catabolic process
Malsu1	75593	876.04	0.634517	0.167226	3.79437	0.000148017	0.00643217	mitochondrial assembly of ribosomal large subunit 1	GO:0070130 negative regulation of mitochondrial translation;GO:0090071 negative regulation of ribosome biogenesis;GO:0090069 regulation of ribosome biogenesis
Morf4l1-ps1	624582	452.855	0.633829	0.197445	3.21016	0.00132661	0.0310165	mortality factor 4 like 1, pseudogene 1
Eif2s2	67204	4862.54	0.633331	0.167309	3.78539	0.00015347	0.00662719	eukaryotic translation initiation factor 2, subunit 2 (beta)	GO:0001732 formation of cytoplasmic translation initiation complex;GO:0002176 male germ cell proliferation;GO:0036093 germ cell proliferation
Rpl37a	19981	18607.1	0.633288	0.185811	3.40824	0.000653843	0.0187685	ribosomal protein L37a	GO:0002181 cytoplasmic translation;GO:0006412 translation;GO:0043043 peptide biosynthetic process
Rps21	66481	18204.2	0.630178	0.153742	4.09894	4.15042e-05	0.00257889	ribosomal protein S21	GO:0000461 endonucleolytic cleavage to generate mature 3'-end of SSU-rRNA from (SSU-rRNA, 5.8S rRNA, LSU-rRNA);GO:0000447 endonucleolytic cleavage in ITS1 to separate SSU-rRNA from 5.8S rRNA and LSU-rRNA from tricistronic rRNA transcript (SSU-rRNA, 5.8S rRNA, LSU-rRNA);GO:0031125 rRNA 3'-end processing
Fstl1	14314	10371.3	0.628085	0.170353	3.68697	0.000226939	0.00875374	follistatin-like 1	GO:0061484 hematopoietic stem cell homeostasis;GO:0043542 endothelial cell migration;GO:0045446 endothelial cell differentiation
S100a10	20194	11157.1	0.625315	0.156786	3.98834	6.65368e-05	0.0036114	S100 calcium binding protein A10 (calpactin)	GO:1905686 positive regulation of plasma membrane repair;GO:1905684 regulation of plasma membrane repair;GO:0001765 membrane raft assembly
2310009B15Rik	69549	549.353	0.624399	0.168324	3.7095	0.000207665	0.00817093	RIKEN cDNA 2310009B15 gene	GO:0008150 biological_process
Rnf130	59044	659.452	0.622881	0.166399	3.7433	0.000181616	0.00737854	ring finger protein 130	GO:0006511 ubiquitin-dependent protein catabolic process;GO:0019941 modification-dependent protein catabolic process;GO:0043632 modification-dependent macromolecule catabolic process
Uqcrh	66576	5131.1	0.620997	0.171721	3.61632	0.000298821	0.0106306	ubiquinol-cytochrome c reductase hinge protein	GO:0006122 mitochondrial electron transport, ubiquinol to cytochrome c;GO:0019646 aerobic electron transport chain;GO:0042775 mitochondrial ATP synthesis coupled electron transport
Ndufa3	66091	1170.12	0.62071	0.163119	3.80526	0.000141657	0.00627496	NADH:ubiquinone oxidoreductase subunit A3	GO:0010257 NADH dehydrogenase complex assembly;GO:0032981 mitochondrial respiratory chain complex I assembly;GO:0042776 proton motive force-driven mitochondrial ATP synthesis
Pttg1	30939	738.905	0.620217	0.196175	3.16155	0.0015693	0.0349831	pituitary tumor-transforming gene 1	GO:0007064 mitotic sister chromatid cohesion;GO:0033046 negative regulation of sister chromatid segregation;GO:0033048 negative regulation of mitotic sister chromatid segregation
Rps13	68052	10819	0.619584	0.159411	3.88669	0.000101619	0.00509321	ribosomal protein S13	GO:0033119 negative regulation of RNA splicing;GO:0002181 cytoplasmic translation;GO:0043484 regulation of RNA splicing
Ndufa2	17991	3414.72	0.618717	0.202377	3.05725	0.00223378	0.0436956	NADH:ubiquinone oxidoreductase subunit A2	GO:0001835 blastocyst hatching;GO:0035188 hatching;GO:0071684 organism emergence from protective structure
Nfia	18027	326.954	0.618676	0.194678	3.17794	0.00148328	0.0334456	nuclear factor I/A	GO:0060074 synapse maturation;GO:0072189 ureter development;GO:0006260 DNA replication
Cox5a	12858	2799.15	0.617445	0.179634	3.43724	0.000587671	0.017392	cytochrome c oxidase subunit 5A	GO:0006123 mitochondrial electron transport, cytochrome c to oxygen;GO:0019646 aerobic electron transport chain;GO:0042775 mitochondrial ATP synthesis coupled electron transport
Tbca	21371	3525.51	0.616932	0.162854	3.78825	0.000151715	0.00657208	tubulin cofactor A	GO:0007023 post-chaperonin tubulin folding pathway;GO:0007021 tubulin complex assembly;GO:0006457 protein folding
Prdx1	18477	11856.5	0.616813	0.175775	3.50911	0.000449604	0.0144289	peroxiredoxin 1	GO:0019430 removal of superoxide radicals;GO:0071450 cellular response to oxygen radical;GO:0071451 cellular response to superoxide
Fcna	14133	456.913	0.609898	0.201267	3.0303	0.00244314	0.0461516	ficolin A	GO:0001867 complement activation, lectin pathway;GO:0006956 complement activation;GO:0002253 activation of immune response
Nbdy	70123	435.273	0.609791	0.199107	3.06263	0.002194	0.0432252	negative regulator of P-body association	GO:0010607 negative regulation of cytoplasmic mRNA processing body assembly;GO:0010603 regulation of cytoplasmic mRNA processing body assembly;GO:1902116 negative regulation of organelle assembly
Uqcc3	107197	458.116	0.609337	0.188531	3.23202	0.00122917	0.0296121	ubiquinol-cytochrome c reductase complex assembly factor 3	GO:0017062 respiratory chain complex III assembly;GO:0034551 mitochondrial respiratory chain complex III assembly;GO:0006122 mitochondrial electron transport, ubiquinol to cytochrome c
Lamtor4	66096	1097.95	0.608562	0.181002	3.36218	0.000773309	0.0213664	late endosomal/lysosomal adaptor, MAPK and MTOR activator 4	GO:0038202 TORC1 signaling;GO:0031929 TOR signaling;GO:0061462 protein localization to lysosome
Mir682	751556	2675.73	0.608182	0.179092	3.39592	0.000683979	0.0193259	microRNA 682	GO:0014844 myoblast proliferation involved in skeletal muscle regeneration;GO:0051450 myoblast proliferation;GO:0043403 skeletal muscle tissue regeneration
Rbm25	67039	5038.83	0.607174	0.166733	3.6416	0.000270944	0.00989523	RNA binding motif protein 25	GO:0000381 regulation of alternative mRNA splicing, via spliceosome;GO:0048024 regulation of mRNA splicing, via spliceosome;GO:0050684 regulation of mRNA processing
Dcaf13	223499	2631.13	0.606663	0.160965	3.76891	0.00016396	0.00694906	DDB1 and CUL4 associated factor 13	GO:0000462 maturation of SSU-rRNA from tricistronic rRNA transcript (SSU-rRNA, 5.8S rRNA, LSU-rRNA);GO:0030490 maturation of SSU-rRNA;GO:0042274 ribosomal small subunit biogenesis
Uqcrb	67530	1151.93	0.606397	0.18755	3.23325	0.00122392	0.0295375	ubiquinol-cytochrome c reductase binding protein	GO:0006122 mitochondrial electron transport, ubiquinol to cytochrome c;GO:0019646 aerobic electron transport chain;GO:0042775 mitochondrial ATP synthesis coupled electron transport
Ndufb8	67264	3083.15	0.60542	0.154774	3.91163	9.16767e-05	0.00466261	NADH:ubiquinone oxidoreductase subunit B8	GO:0006120 mitochondrial electron transport, NADH to ubiquinone;GO:0019646 aerobic electron transport chain;GO:0010257 NADH dehydrogenase complex assembly
Cnbp	12785	14192	0.604358	0.160008	3.77704	0.000158702	0.00678909	cellular nucleic acid binding protein	GO:0071919 G-quadruplex DNA formation;GO:2000767 positive regulation of cytoplasmic translation;GO:2000765 regulation of cytoplasmic translation
Lsm7	66094	1058.4	0.603666	0.188419	3.20385	0.00135601	0.0314539	LSM7 homolog, U6 small nuclear RNA and mRNA degradation associated	GO:0000956 nuclear-transcribed mRNA catabolic process;GO:0006402 mRNA catabolic process;GO:0006401 RNA catabolic process
Atp5md	66477	4451.41	0.603305	0.152712	3.95061	7.79509e-05	0.00406584	ATP synthase membrane subunit DAPIT	GO:0008150 biological_process
Mphosph6	68533	803.904	0.60138	0.188677	3.18735	0.00143581	0.0328609	M phase phosphoprotein 6	GO:0000460 maturation of 5.8S rRNA;GO:0006364 rRNA processing;GO:0016072 rRNA metabolic process
Snhg15	100041286	719.982	0.601075	0.190421	3.15657	0.00159639	0.0353574	small nucleolar RNA host gene 15	GO:0008150 biological_process
Npm1	18148	31215.5	0.600758	0.141253	4.25305	2.10875e-05	0.00151609	nucleophosmin 1	GO:0060735 regulation of eIF2 alpha phosphorylation by dsRNA;GO:1902629 regulation of mRNA stability involved in cellular response to UV;GO:0006407 rRNA export from nucleus
Fkbp11	66120	499.675	0.599727	0.18319	3.27379	0.00106114	0.026688	FK506 binding protein 11
Pstk	214580	278.071	0.597944	0.187744	3.18489	0.0014481	0.0329773	phosphoseryl-tRNA kinase	GO:0001514 selenocysteine incorporation;GO:0006451 translational readthrough;GO:0006414 translational elongation	yes
Esd	13885	4590.4	0.597003	0.145773	4.09544	4.21374e-05	0.00260644	esterase D/formylglutathione hydrolase	GO:0046294 formaldehyde catabolic process;GO:0046292 formaldehyde metabolic process;GO:0110095 cellular detoxification of aldehyde
Lsm3	67678	1692.24	0.59652	0.164899	3.61749	0.000297472	0.0106101	LSM3 homolog, U6 small nuclear RNA and mRNA degradation associated	GO:0033962 P-body assembly;GO:0000956 nuclear-transcribed mRNA catabolic process;GO:0006402 mRNA catabolic process
Prdx6	11758	7213.69	0.592937	0.160525	3.69373	0.000220989	0.00862109	peroxiredoxin 6	GO:0032060 bleb assembly;GO:0098869 cellular oxidant detoxification;GO:0042744 hydrogen peroxide catabolic process
Rpl6l	432502	961.31	0.591335	0.192292	3.07519	0.00210371	0.042046	ribosomal protein L6-like
mt-Rnr1	17724	2274.69	0.59039	0.183525	3.21694	0.00129567	0.0305131	s-rRNA	GO:0000028 ribosomal small subunit assembly;GO:0042255 ribosome assembly;GO:0042274 ribosomal small subunit biogenesis
Commd3	12238	2143.32	0.589951	0.16152	3.65249	0.000259707	0.00956113	COMM domain containing 3	GO:0006814 sodium ion transport;GO:0030001 metal ion transport;GO:0006812 cation transport
Fth1	14319	68429.9	0.589424	0.166794	3.53384	0.000409568	0.013455	ferritin heavy polypeptide 1	GO:0006880 intracellular sequestering of iron ion;GO:0097577 sequestering of iron ion;GO:0051238 sequestering of metal ion
Myl6	17904	18628.7	0.587875	0.159361	3.68895	0.000225183	0.00871045	myosin, light polypeptide 6, alkali, smooth muscle and non-muscle	GO:0030049 muscle filament sliding;GO:0033275 actin-myosin filament sliding;GO:0070252 actin-mediated cell contraction
Gm9892	100040220	1085.94	0.587765	0.153271	3.8348	0.000125667	0.00577547	eukaryotic translation initiation factor 2, subunit 2 (beta) pseudogene
Cox6b1	110323	3818.89	0.58743	0.167575	3.50548	0.000455786	0.0144881	cytochrome c oxidase, subunit 6B1
Mtarc2	67247	1812.84	0.587241	0.155215	3.78341	0.000154695	0.00663835	mitochondrial amidoxime reducing component 2	GO:0051410 detoxification of nitrogen compound;GO:0070458 cellular detoxification of nitrogen compound;GO:0042126 nitrate metabolic process
Gm19810	100503642	881.001	0.586707	0.166817	3.51706	0.000436355	0.0140989	40S ribosomal protein S21 pseudogene
Nxpe5	381680	286.919	0.586156	0.190687	3.07391	0.00211271	0.042046	neurexophilin and PC-esterase domain family, member 5	GO:0008150 biological_process
Vamp8	22320	2618.17	0.585488	0.157097	3.72692	0.000193833	0.00778279	vesicle-associated membrane protein 8	GO:1902278 positive regulation of pancreatic amylase secretion;GO:0070625 zymogen granule exocytosis;GO:1902276 regulation of pancreatic amylase secretion
Bnc1	12173	1056.87	-0.585822	0.176682	-3.31569	0.000914172	0.0240027	basonuclin 1	GO:1900195 positive regulation of oocyte maturation;GO:1900193 regulation of oocyte maturation;GO:1903431 positive regulation of cell maturation
Lrp5	16973	2461.56	-0.585869	0.169205	-3.46249	0.000535201	0.0161881	low density lipoprotein receptor-related protein 5	GO:0060764 cell-cell signaling involved in mammary gland development;GO:0110135 Norrin signaling pathway;GO:0061304 retinal blood vessel morphogenesis
Ppp1r10	52040	784.378	-0.586138	0.188892	-3.10304	0.00191546	0.0399137	protein phosphatase 1, regulatory subunit 10	GO:1904290 negative regulation of mitotic DNA damage checkpoint;GO:1904289 regulation of mitotic DNA damage checkpoint;GO:2000002 negative regulation of DNA damage checkpoint
Csk	12988	992.842	-0.587602	0.163261	-3.59917	0.000319235	0.0112022	c-src tyrosine kinase	GO:0042997 negative regulation of Golgi to plasma membrane protein transport;GO:0010989 negative regulation of low-density lipoprotein particle clearance;GO:0010985 negative regulation of lipoprotein particle clearance	yes
Cabin1	104248	787.026	-0.587894	0.168493	-3.48912	0.000484607	0.0150217	calcineurin binding protein 1	GO:0060548 negative regulation of cell death;GO:0010941 regulation of cell death;GO:0048523 negative regulation of cellular process
Rgma	244058	848.402	-0.588458	0.173057	-3.40038	0.000672934	0.019062	repulsive guidance molecule family member A	GO:0048671 negative regulation of collateral sprouting;GO:1900121 negative regulation of receptor binding;GO:0048681 negative regulation of axon regeneration
Tsc1	64930	454.726	-0.590838	0.176376	-3.34988	0.00080847	0.0220276	TSC complex subunit 1	GO:0043379 memory T cell differentiation;GO:0006407 rRNA export from nucleus;GO:0090713 immunological memory process
Cep250	16328	1589.98	-0.593354	0.183131	-3.24004	0.00119511	0.0290464	centrosomal protein 250	GO:0030997 regulation of centriole-centriole cohesion;GO:1904781 positive regulation of protein localization to centrosome;GO:1904779 regulation of protein localization to centrosome
Soga1	320706	1464.85	-0.594394	0.166972	-3.55985	0.000371064	0.0126753	suppressor of glucose, autophagy associated 1	GO:0045721 negative regulation of gluconeogenesis;GO:0010677 negative regulation of cellular carbohydrate metabolic process;GO:0045912 negative regulation of carbohydrate metabolic process
Trerf1	224829	633.432	-0.594498	0.18221	-3.26271	0.00110351	0.0274518	transcriptional regulating factor 1	GO:0071393 cellular response to progesterone stimulus;GO:0050847 progesterone receptor signaling pathway;GO:0032570 response to progesterone
Mmp10	17384	460.247	-0.595168	0.194057	-3.06698	0.00216236	0.042786	matrix metallopeptidase 10	GO:0030574 collagen catabolic process;GO:0032963 collagen metabolic process;GO:0030198 extracellular matrix organization
Ttc17	74569	501.179	-0.595311	0.183154	-3.25033	0.00115271	0.0284027	tetratricopeptide repeat domain 17	GO:0030041 actin filament polymerization;GO:0008154 actin polymerization or depolymerization;GO:0051258 protein polymerization
Bace1	23821	827.358	-0.596423	0.167885	-3.55257	0.000381494	0.0128085	beta-site APP cleaving enzyme 1	GO:0034205 amyloid-beta formation;GO:0042987 amyloid precursor protein catabolic process;GO:0060134 prepulse inhibition
Irak2	108960	367.754	-0.599263	0.193424	-3.09818	0.00194712	0.0402679	interleukin-1 receptor-associated kinase 2	GO:0002755 MyD88-dependent toll-like receptor signaling pathway;GO:0070498 interleukin-1-mediated signaling pathway;GO:0031663 lipopolysaccharide-mediated signaling pathway	yes
Vps13c	320528	514.17	-0.600663	0.174582	-3.44058	0.000580458	0.0172157	vacuolar protein sorting 13C	GO:1905090 negative regulation of parkin-mediated stimulation of mitophagy in response to mitochondrial depolarization;GO:1905089 regulation of parkin-mediated stimulation of mitophagy in response to mitochondrial depolarization;GO:0045053 protein retention in Golgi apparatus
Lgals3bp	19039	544.408	-0.6016	0.182697	-3.29288	0.000991651	0.025453	lectin, galactoside-binding, soluble, 3 binding protein	GO:0007155 cell adhesion;GO:0009987 cellular process;GO:0008150 biological_process
Lss	16987	364.396	-0.602753	0.18823	-3.20222	0.00136375	0.03158	lanosterol synthase	GO:0006722 triterpenoid metabolic process;GO:0016104 triterpenoid biosynthetic process;GO:0016114 terpenoid biosynthetic process
Plxna1	18844	1578.36	-0.602758	0.184259	-3.27126	0.00107069	0.026781	plexin A1	GO:0060666 dichotomous subdivision of terminal units involved in salivary gland branching;GO:0060600 dichotomous subdivision of an epithelial terminal unit;GO:1902287 semaphorin-plexin signaling pathway involved in axon guidance
Ash1l	192195	866.742	-0.602947	0.189558	-3.18081	0.00146863	0.0332794	ASH1 like histone lysine methyltransferase	GO:1903709 uterine gland development;GO:1903699 tarsal gland development;GO:0097676 histone H3-K36 dimethylation
Map3k3	26406	1227.1	-0.606187	0.160884	-3.76786	0.000164654	0.00695701	mitogen-activated protein kinase kinase kinase 3	GO:0071864 positive regulation of cell proliferation in bone marrow;GO:0071863 regulation of cell proliferation in bone marrow;GO:2000773 negative regulation of cellular senescence	yes
Strn	268980	333.75	-0.606523	0.188022	-3.22582	0.00125614	0.0299413	striatin, calmodulin binding protein	GO:0016358 dendrite development;GO:0007626 locomotory behavior;GO:0016055 Wnt signaling pathway
Zmiz2	52915	770.641	-0.607862	0.184362	-3.2971	0.000976881	0.0252153	zinc finger, MIZ-type containing 2	GO:0045944 positive regulation of transcription by RNA polymerase II;GO:0045893 positive regulation of DNA-templated transcription;GO:1903508 positive regulation of nucleic acid-templated transcription
Lrrk2	66725	1558.91	-0.610075	0.172791	-3.53072	0.000414428	0.0135176	leucine-rich repeat kinase 2	GO:1903125 negative regulation of thioredoxin peroxidase activity by peptidyl-threonine phosphorylation;GO:1904887 Wnt signalosome assembly;GO:1902499 positive regulation of protein autoubiquitination	yes
Foxo3	56484	524.919	-0.611275	0.199728	-3.06054	0.00220938	0.0433417	forkhead box O3	GO:0001544 initiation of primordial ovarian follicle growth;GO:0014737 positive regulation of muscle atrophy;GO:0014735 regulation of muscle atrophy
Mef2a	17258	351.618	-0.612127	0.18949	-3.23039	0.0012362	0.0297121	myocyte enhancer factor 2A	GO:0055005 ventricular cardiac myofibril assembly;GO:0070375 ERK5 cascade;GO:0055015 ventricular cardiac muscle cell development
Arhgef18	102098	462.639	-0.612453	0.187397	-3.26821	0.00108229	0.0269729	rho/rac guanine nucleotide exchange factor (GEF) 18	GO:0150105 protein localization to cell-cell junction;GO:0051497 negative regulation of stress fiber assembly;GO:0032232 negative regulation of actin filament bundle assembly
Scd1	20249	1777.14	-0.612788	0.160062	-3.82845	0.000128955	0.00586363	stearoyl-Coenzyme A desaturase 1	GO:1903699 tarsal gland development;GO:1903964 monounsaturated fatty acid metabolic process;GO:1903966 monounsaturated fatty acid biosynthetic process
Pom121	107939	1036.43	-0.612825	0.162782	-3.7647	0.000166747	0.00702383	nuclear pore membrane protein 121	GO:0006999 nuclear pore organization;GO:0006405 RNA export from nucleus;GO:0006606 protein import into nucleus
Loxl3	16950	2574.54	-0.613245	0.17137	-3.57848	0.000345598	0.011924	lysyl oxidase-like 3	GO:1905590 fibronectin fibril organization;GO:2000329 negative regulation of T-helper 17 cell lineage commitment;GO:2000328 regulation of T-helper 17 cell lineage commitment
Rnf213	672511	1278.08	-0.613577	0.189722	-3.23409	0.00122033	0.0295027	ring finger protein 213	GO:0120322 lipid modification by small protein conjugation;GO:0120323 lipid ubiquitination;GO:2000051 negative regulation of non-canonical Wnt signaling pathway
Tnrc18	231861	1556.34	-0.615119	0.15307	-4.01855	5.85566e-05	0.00330905	trinucleotide repeat containing 18
Itpr3	16440	3539.13	-0.61816	0.170236	-3.63119	0.000282117	0.0101948	inositol 1,4,5-triphosphate receptor 3	GO:0050917 sensory perception of umami taste;GO:0050916 sensory perception of sweet taste;GO:0060402 calcium ion transport into cytosol
Cap1	12331	7633.9	-0.619427	0.140481	-4.40932	1.03696e-05	0.000895567	CAP, adenylate cyclase-associated protein 1 (yeast)	GO:0019933 cAMP-mediated signaling;GO:0045761 regulation of adenylate cyclase activity;GO:0019935 cyclic-nucleotide-mediated signaling
Hectd4	269700	386.491	-0.62329	0.195786	-3.18352	0.00145495	0.0330239	HECT domain E3 ubiquitin protein ligase 4	GO:0006006 glucose metabolic process;GO:0019318 hexose metabolic process;GO:0005996 monosaccharide metabolic process
Adam10	11487	1696.4	-0.623296	0.182898	-3.40788	0.000654685	0.0187685	a disintegrin and metallopeptidase domain 10	GO:0051089 constitutive protein ectodomain proteolysis;GO:0038004 epidermal growth factor receptor ligand maturation;GO:0042117 monocyte activation
Tyk2	54721	531.792	-0.623875	0.196261	-3.1788	0.00147884	0.0334456	tyrosine kinase 2	GO:0060397 growth hormone receptor signaling pathway via JAK-STAT;GO:0051142 positive regulation of NK T cell proliferation;GO:0032819 positive regulation of natural killer cell proliferation	yes
Mink1	50932	1717.71	-0.626156	0.176327	-3.55111	0.00038361	0.0128169	misshapen-like kinase 1 (zebrafish)	GO:0045060 negative thymic T cell selection;GO:0043383 negative T cell selection;GO:2000311 regulation of AMPA receptor activity	yes
Thada	240174	361.252	-0.626753	0.188187	-3.33048	0.000866968	0.0230721	thyroid adenoma associated	GO:0032471 negative regulation of endoplasmic reticulum calcium ion concentration;GO:0032469 endoplasmic reticulum calcium ion homeostasis;GO:0030488 tRNA methylation
Lama5	16776	5803.46	-0.627869	0.175928	-3.5689	0.00035848	0.0123066	laminin, alpha 5	GO:0035290 trunk segmentation;GO:0036484 trunk neural crest cell migration;GO:0060445 branching involved in salivary gland morphogenesis
Entpd1	12495	846.376	-0.629145	0.195642	-3.2158	0.00130081	0.0305347	ectonucleoside triphosphate diphosphohydrolase 1	GO:2001170 negative regulation of ATP biosynthetic process;GO:0046032 ADP catabolic process;GO:0030809 negative regulation of nucleotide biosynthetic process
Ccbe1	320924	1750.59	-0.631782	0.176352	-3.5825	0.000340318	0.0118011	collagen and calcium binding EGF domains 1	GO:1901492 positive regulation of lymphangiogenesis;GO:1904977 lymphatic endothelial cell migration;GO:1900748 positive regulation of vascular endothelial growth factor signaling pathway
Vps13d	230895	527.416	-0.63421	0.194475	-3.26114	0.00110964	0.0275047	vacuolar protein sorting 13D	GO:0045053 protein retention in Golgi apparatus;GO:1901526 positive regulation of mitophagy;GO:1903599 positive regulation of autophagy of mitochondrion
Narf	67608	694.934	-0.63562	0.178647	-3.55797	0.000373735	0.0127348	nuclear prelamin A recognition factor	GO:0008150 biological_process
Igf2r	16004	3039.94	-0.637374	0.182631	-3.48995	0.000483114	0.0150217	insulin-like growth factor 2 receptor	GO:0044794 positive regulation by host of viral process;GO:0044788 modulation by host of viral process;GO:0051851 modulation by host of symbiont process
Plekho2	102595	2806.08	-0.637794	0.184987	-3.44779	0.000565196	0.0169091	pleckstrin homology domain containing, family O member 2	GO:0071888 macrophage apoptotic process;GO:0006925 inflammatory cell apoptotic process;GO:0033028 myeloid cell apoptotic process
Creb3l2	208647	669.579	-0.638915	0.198208	-3.22346	0.00126653	0.0300899	cAMP responsive element binding protein 3-like 2	GO:0030968 endoplasmic reticulum unfolded protein response;GO:0034620 cellular response to unfolded protein;GO:0002062 chondrocyte differentiation
Serpinb9	20723	599.277	-0.640641	0.212549	-3.01408	0.00257758	0.0480262	serine (or cysteine) peptidase inhibitor, clade B, member 9	GO:0042270 protection from natural killer cell mediated cytotoxicity;GO:0002438 acute inflammatory response to antigenic stimulus;GO:0001913 T cell mediated cytotoxicity
Pcnt	18541	738.513	-0.641003	0.159858	-4.00982	6.07648e-05	0.00337823	pericentrin (kendrin)	GO:1990403 embryonic brain development;GO:0048854 brain morphogenesis;GO:0021696 cerebellar cortex morphogenesis
Ston1	77057	817.804	-0.641412	0.180463	-3.55425	0.000379054	0.0127829	stonin 1	GO:0120180 cell-substrate junction disassembly;GO:0120181 focal adhesion disassembly;GO:0150146 cell junction disassembly
Mib1	225164	346.97	-0.646479	0.19569	-3.30359	0.000954552	0.0247319	MIB E3 ubiquitin protein ligase 1	GO:0001947 heart looping;GO:0061371 determination of heart left/right asymmetry;GO:0003143 embryonic heart tube morphogenesis
Carm1	59035	999.397	-0.648145	0.175873	-3.68529	0.000228439	0.00878691	coactivator-associated arginine methyltransferase 1	GO:0034970 histone H3-R2 methylation;GO:0003420 regulation of growth plate cartilage chondrocyte proliferation;GO:0034971 histone H3-R17 methylation
Zer1	227693	296.374	-0.650439	0.209349	-3.10696	0.00189019	0.039507	zyg-11 related, cell cycle regulator	GO:0006515 protein quality control for misfolded or incompletely synthesized proteins;GO:0032436 positive regulation of proteasomal ubiquitin-dependent protein catabolic process;GO:2000060 positive regulation of ubiquitin-dependent protein catabolic process
Apcdd1	494504	6155.89	-0.651234	0.162	-4.01996	5.82088e-05	0.00330299	adenomatosis polyposis coli down-regulated 1	GO:0043615 astrocyte cell migration;GO:0042487 regulation of odontogenesis of dentin-containing tooth;GO:0042481 regulation of odontogenesis
Gatad2b	229542	271.672	-0.652614	0.216707	-3.0115	0.0025996	0.0483055	GATA zinc finger domain containing 2B	GO:0042659 regulation of cell fate specification;GO:0010453 regulation of cell fate commitment;GO:0016575 histone deacetylation
Dock5	68813	1000.55	-0.652761	0.15976	-4.0859	4.3907e-05	0.00266755	dedicator of cytokinesis 5	GO:1904694 negative regulation of vascular associated smooth muscle contraction;GO:0003056 regulation of vascular associated smooth muscle contraction;GO:0045906 negative regulation of vasoconstriction
Ep300	328572	974.69	-0.653504	0.175012	-3.73405	0.000188426	0.00760422	E1A binding protein p300	GO:0036268 swimming;GO:0061921 peptidyl-lysine propionylation;GO:0140066 peptidyl-lysine crotonylation
Trim56	384309	236.635	-0.655568	0.201929	-3.24653	0.00116823	0.0286377	tripartite motif-containing 56	GO:0060340 positive regulation of type I interferon-mediated signaling pathway;GO:0044790 suppression of viral release by host;GO:0046597 negative regulation of viral entry into host cell
Sh2b3	16923	650.905	-0.656225	0.175766	-3.73351	0.000188832	0.00760422	SH2B adaptor protein 3	GO:1900234 regulation of Kit signaling pathway;GO:1900235 negative regulation of Kit signaling pathway;GO:0035702 monocyte homeostasis
Tmem119	231633	1403.98	-0.659165	0.196483	-3.35482	0.000794173	0.0217676	transmembrane protein 119	GO:1903012 positive regulation of bone development;GO:1903010 regulation of bone development;GO:0033690 positive regulation of osteoblast proliferation
Kcnq5	226922	635.161	-0.660442	0.185796	-3.55466	0.00037847	0.0127829	potassium voltage-gated channel, subfamily Q, member 5	GO:0071805 potassium ion transmembrane transport;GO:0006813 potassium ion transport;GO:0098662 inorganic cation transmembrane transport
Twsg1	65960	1192.41	-0.66142	0.190072	-3.47985	0.0005017	0.015447	twisted gastrulation BMP signaling modulator 1	GO:2000562 negative regulation of CD4-positive, alpha-beta T cell proliferation;GO:0046642 negative regulation of alpha-beta T cell proliferation;GO:2000561 regulation of CD4-positive, alpha-beta T cell proliferation
Ago2	239528	733.431	-0.662402	0.197051	-3.36157	0.000775002	0.0213701	argonaute RISC catalytic subunit 2	GO:0045974 regulation of translation, ncRNA-mediated;GO:0045975 positive regulation of translation, ncRNA-mediated;GO:0090625 siRNA-mediated gene silencing by mRNA destabilization
Agrn	11603	1337.75	-0.66263	0.178378	-3.71476	0.000203399	0.00808369	agrin	GO:1903277 negative regulation of sodium ion export across plasma membrane;GO:1903407 negative regulation of P-type sodium:potassium-exchanging transporter activity;GO:2000539 regulation of protein geranylgeranylation
Fkrp	243853	578.071	-0.663318	0.188185	-3.52481	0.000423782	0.01379	fukutin related protein	GO:0035269 protein O-linked mannosylation;GO:0035268 protein mannosylation;GO:0097502 mannosylation
Xpo5	72322	1226.31	-0.664784	0.164126	-4.05046	5.11175e-05	0.00299977	exportin 5	GO:0035281 pre-miRNA export from nucleus;GO:0060148 positive regulation of post-transcriptional gene silencing;GO:1900370 positive regulation of post-transcriptional gene silencing by RNA
Rptor	74370	1115.63	-0.665808	0.168375	-3.95431	7.67558e-05	0.00403835	regulatory associated protein of MTOR, complex 1	GO:1905857 positive regulation of pentose-phosphate shunt;GO:0043456 regulation of pentose-phosphate shunt;GO:1902031 regulation of NADP metabolic process
Ankrd52	237615	1035.57	-0.666989	0.170759	-3.90603	9.38252e-05	0.00475427	ankyrin repeat domain 52	GO:0008150 biological_process
Fryl	72313	647.102	-0.669859	0.175127	-3.82499	0.000130776	0.00586868	FRY like transcription coactivator	GO:0031175 neuron projection development;GO:0000902 cell morphogenesis;GO:0048666 neuron development
Slx4	52864	369.739	-0.671756	0.215142	-3.12239	0.0017939	0.0386109	SLX4 structure-specific endonuclease subunit homolog (S. cerevisiae)	GO:1904431 positive regulation of t-circle formation;GO:0000706 meiotic DNA double-strand break processing;GO:0072429 response to intra-S DNA damage checkpoint signaling
Wnt7b	22422	2219.23	-0.672258	0.168228	-3.99611	6.43909e-05	0.00352699	wingless-type MMTV integration site family, member 7B	GO:0036516 chemoattraction of dopaminergic neuron axon;GO:0072060 outer medullary collecting duct development;GO:0072054 renal outer medulla development
Mef2d	17261	772.157	-0.675603	0.184518	-3.66144	0.000250799	0.00933327	myocyte enhancer factor 2D	GO:0001958 endochondral ossification;GO:0036075 replacement ossification;GO:1904707 positive regulation of vascular associated smooth muscle cell proliferation
Pcdhgc3	93706	1848.94	-0.676003	0.170655	-3.96123	7.45662e-05	0.00393824	protocadherin gamma subfamily C, 3	GO:0016339 calcium-dependent cell-cell adhesion via plasma membrane cell adhesion molecules;GO:0007156 homophilic cell adhesion via plasma membrane adhesion molecules;GO:0043524 negative regulation of neuron apoptotic process
Ripor1	75687	595.432	-0.676534	0.174012	-3.88786	0.000101133	0.00509321	RHO family interacting cell polarization regulator 1	GO:2001107 negative regulation of Rho guanyl-nucleotide exchange factor activity;GO:0051683 establishment of Golgi localization;GO:1905098 negative regulation of guanyl-nucleotide exchange factor activity
Spred2	114716	437.089	-0.681131	0.192221	-3.54347	0.000394897	0.0130668	sprouty-related EVH1 domain containing 2	GO:1902747 negative regulation of lens fiber cell differentiation;GO:1902746 regulation of lens fiber cell differentiation;GO:0043517 positive regulation of DNA damage response, signal transduction by p53 class mediator
Abca3	27410	664.824	-0.682902	0.187225	-3.64749	0.000264814	0.00972305	ATP-binding cassette, sub-family A (ABC1), member 3	GO:0032464 positive regulation of protein homooligomerization;GO:0032462 regulation of protein homooligomerization;GO:1902994 regulation of phospholipid efflux
Synj2	20975	1158.88	-0.685258	0.179134	-3.8254	0.000130562	0.00586868	synaptojanin 2	GO:0048312 intracellular distribution of mitochondria;GO:0046855 inositol phosphate dephosphorylation;GO:0046838 phosphorylated carbohydrate dephosphorylation
Atf7ip	54343	644.658	-0.68716	0.167842	-4.09408	4.23849e-05	0.00261	activating transcription factor 7 interacting protein	GO:0045898 regulation of RNA polymerase II transcription preinitiation complex assembly;GO:0090309 positive regulation of DNA methylation-dependent heterochromatin formation;GO:0031453 positive regulation of heterochromatin formation
Gch1	14528	953.343	-0.687596	0.190427	-3.61082	0.000305236	0.0108307	GTP cyclohydrolase 1	GO:0051066 dihydrobiopterin metabolic process;GO:1905627 regulation of serotonin biosynthetic process;GO:0014916 regulation of lung blood pressure
Wiz	22404	699.539	-0.688419	0.173655	-3.96429	7.36158e-05	0.00391819	widely-interspaced zinc finger motifs	GO:0010571 positive regulation of nuclear cell cycle DNA replication;GO:0033262 regulation of nuclear cell cycle DNA replication;GO:2000105 positive regulation of DNA-templated DNA replication
Dock9	105445	1584.37	-0.690224	0.188968	-3.6526	0.000259597	0.00956113	dedicator of cytokinesis 9	GO:0007264 small GTPase mediated signal transduction;GO:0043547 positive regulation of GTPase activity;GO:0043087 regulation of GTPase activity
Filip1l	78749	1445.79	-0.690643	0.156053	-4.42568	9.61392e-06	0.000840845	filamin A interacting protein 1-like	GO:0008150 biological_process
Cx3cl1	20312	363.412	-0.691829	0.207395	-3.3358	0.000850553	0.0228121	chemokine (C-X3-C motif) ligand 1	GO:0051041 positive regulation of calcium-independent cell-cell adhesion;GO:1900450 negative regulation of glutamate receptor signaling pathway;GO:0051040 regulation of calcium-independent cell-cell adhesion
Ndst1	15531	1986.57	-0.691857	0.16367	-4.22714	2.36678e-05	0.00167293	N-deacetylase/N-sulfotransferase (heparan glucosaminyl) 1	GO:0006477 protein sulfation;GO:0015014 heparan sulfate proteoglycan biosynthetic process, polysaccharide chain biosynthetic process;GO:0048702 embryonic neurocranium morphogenesis
Man1a	17155	4831.6	-0.692428	0.159218	-4.34892	1.36809e-05	0.00111163	mannosidase 1, alpha	GO:0035977 protein deglycosylation involved in glycoprotein catabolic process;GO:0036507 protein demannosylation;GO:0036508 protein alpha-1,2-demannosylation
Tenm4	23966	2995.95	-0.693036	0.160149	-4.32744	1.5085e-05	0.0011837	teneurin transmembrane protein 4	GO:0060912 cardiac cell fate specification;GO:0032289 central nervous system myelin formation;GO:2000543 positive regulation of gastrulation
Ccl11	20292	471.047	-0.696052	0.23199	-3.00036	0.00269665	0.0493081	chemokine (C-C motif) ligand 11	GO:0002551 mast cell chemotaxis;GO:0060763 mammary duct terminal end bud growth;GO:0097531 mast cell migration
Irs2	384783	229.609	-0.69679	0.217905	-3.19767	0.00138542	0.0319742	insulin receptor substrate 2	GO:0010748 negative regulation of long-chain fatty acid import across plasma membrane;GO:0140213 negative regulation of long-chain fatty acid import into cell;GO:0010746 regulation of long-chain fatty acid import across plasma membrane
Rapgef4	56508	175.317	-0.698024	0.217497	-3.20935	0.00133038	0.0310165	Rap guanine nucleotide exchange factor (GEF) 4	GO:1904457 positive regulation of neuronal action potential;GO:0098693 regulation of synaptic vesicle cycle;GO:0051971 positive regulation of transmission of nerve impulse
Crkl	12929	606.536	-0.699282	0.181273	-3.85761	0.000114499	0.00549755	v-crk avian sarcoma virus CT10 oncogene homolog-like	GO:0035685 helper T cell diapedesis;GO:0060465 pharynx development;GO:0035684 helper T cell extravasation
Bmpr2	12168	245.627	-0.701123	0.220124	-3.18513	0.00144687	0.0329773	bone morphogenetic protein receptor, type II (serine/threonine kinase)	GO:0003252 negative regulation of cell proliferation involved in heart valve morphogenesis;GO:0003250 regulation of cell proliferation involved in heart valve morphogenesis;GO:2000137 negative regulation of cell proliferation involved in heart morphogenesis	yes
Clcn6	26372	159.946	-0.70181	0.222173	-3.15884	0.00158399	0.0351394	chloride channel, voltage-sensitive 6	GO:0006821 chloride transport;GO:0015698 inorganic anion transport;GO:0009612 response to mechanical stimulus
Epg5	100502841	331.122	-0.703229	0.186579	-3.76907	0.000163857	0.00694906	ectopic P-granules autophagy protein 5 homolog (C. elegans)	GO:1990784 response to dsDNA;GO:1990786 cellular response to dsDNA;GO:0034162 toll-like receptor 9 signaling pathway
Acss2	60525	127.014	-0.70511	0.220285	-3.20089	0.00137003	0.0316721	acyl-CoA synthetase short-chain family member 2	GO:0019413 acetate biosynthetic process;GO:0019542 propionate biosynthetic process;GO:0006083 acetate metabolic process
Tns2	209039	1911.24	-0.707297	0.167369	-4.22597	2.37914e-05	0.00167293	tensin 2	GO:0014850 response to muscle activity;GO:0035335 peptidyl-tyrosine dephosphorylation;GO:0014823 response to activity
Dot1l	208266	420.092	-0.707702	0.193351	-3.66019	0.000252025	0.00935353	DOT1-like, histone H3 methyltransferase (S. cerevisiae)	GO:0034729 histone H3-K79 methylation;GO:2000677 regulation of transcription regulatory region DNA binding;GO:0034968 histone lysine methylation
Kcnh2	16511	310.515	-0.708343	0.210333	-3.36773	0.000757905	0.020983	potassium voltage-gated channel, subfamily H (eag-related), member 2	GO:1903765 negative regulation of potassium ion export across plasma membrane;GO:0098915 membrane repolarization during ventricular cardiac muscle cell action potential;GO:1903764 regulation of potassium ion export across plasma membrane
Ncor2	20602	1700.49	-0.710098	0.164229	-4.32383	1.53343e-05	0.00118966	nuclear receptor co-repressor 2	GO:0060509 type I pneumocyte differentiation;GO:1901725 regulation of histone deacetylase activity;GO:0150065 regulation of deacetylase activity
Herc2	15204	1038.02	-0.714639	0.171852	-4.15846	3.20396e-05	0.00209509	HECT and RLD domain containing E3 ubiquitin protein ligase 2	GO:0043161 proteasome-mediated ubiquitin-dependent protein catabolic process;GO:0010498 proteasomal protein catabolic process;GO:0006281 DNA repair
Dock10	210293	1722.73	-0.720036	0.192181	-3.74665	0.000179214	0.00731822	dedicator of cytokinesis 10	GO:0002315 marginal zone B cell differentiation;GO:0060997 dendritic spine morphogenesis;GO:0002313 mature B cell differentiation involved in immune response
Naip2	17948	339.579	-0.723756	0.224841	-3.21897	0.00128653	0.0303551	NLR family, apoptosis inhibitory protein 2	GO:0016045 detection of bacterium;GO:0010804 negative regulation of tumor necrosis factor-mediated signaling pathway;GO:0098543 detection of other organism
Sepsecs	211006	109.012	-0.724016	0.239022	-3.02908	0.00245298	0.0462624	Sep (O-phosphoserine) tRNA:Sec (selenocysteine) tRNA synthase	GO:0097056 selenocysteinyl-tRNA(Sec) biosynthetic process;GO:0001514 selenocysteine incorporation;GO:0006451 translational readthrough
Dennd4c	329877	367.764	-0.724287	0.205554	-3.52358	0.000425752	0.0138213	DENN/MADD domain containing 4C	GO:0032483 regulation of Rab protein signal transduction;GO:0032869 cellular response to insulin stimulus;GO:0032868 response to insulin
Mob1a	232157	1033.83	-0.728845	0.201239	-3.6218	0.000292563	0.0104622	MOB kinase activator 1A	GO:0035329 hippo signaling;GO:0001934 positive regulation of protein phosphorylation;GO:0042327 positive regulation of phosphorylation
Eps8l2	98845	164.307	-0.731066	0.232414	-3.14552	0.00165789	0.0363534	EPS8-like 2	GO:1900029 positive regulation of ruffle assembly;GO:0016601 Rac protein signal transduction;GO:1900027 regulation of ruffle assembly
Peg3	18616	209.421	-0.732091	0.2405	-3.04404	0.00233425	0.0447055	paternally expressed 3	GO:0000122 negative regulation of transcription by RNA polymerase II;GO:0006915 apoptotic process;GO:0012501 programmed cell death
Gbp3	55932	160.633	-0.732826	0.232779	-3.14816	0.00164302	0.036099	guanylate binding protein 3	GO:0044406 adhesion of symbiont to host;GO:0042832 defense response to protozoan;GO:0001562 response to protozoan
Acpp	56318	2598.19	-0.73336	0.156741	-4.67879	2.88578e-06	0.000333005	acid phosphatase, prostate	GO:0060168 positive regulation of adenosine receptor signaling pathway;GO:0006772 thiamine metabolic process;GO:0042723 thiamine-containing compound metabolic process
Bahcc1	268515	624.522	-0.733933	0.170013	-4.31691	1.58227e-05	0.00121384	BAH domain and coiled-coil containing 1
Tarbp1	212728	253.544	-0.736772	0.224882	-3.27625	0.00105194	0.0265537	TAR RNA binding protein 1	GO:0030488 tRNA methylation;GO:0001510 RNA methylation;GO:0006400 tRNA modification
Hcn2	15166	138.316	-0.737984	0.228747	-3.2262	0.00125447	0.0299413	hyperpolarization-activated, cyclic nucleotide-gated K+ 2	GO:0071321 cellular response to cGMP;GO:0098907 regulation of SA node cell action potential;GO:0070305 response to cGMP
Mical2	320878	716.409	-0.738531	0.173014	-4.26863	1.9668e-05	0.00144428	microtubule associated monooxygenase, calponin and LIM domain containing 2	GO:0019417 sulfur oxidation;GO:0030042 actin filament depolymerization;GO:0051261 protein depolymerization
Shank3	58234	551.509	-0.742238	0.172829	-4.29464	1.74979e-05	0.00131301	SH3 and multiple ankyrin repeat domains 3	GO:0097117 guanylate kinase-associated protein clustering;GO:1900451 positive regulation of glutamate receptor signaling pathway;GO:0051835 positive regulation of synapse structural plasticity
Dag1	13138	1406.53	-0.744025	0.176534	-4.21463	2.50186e-05	0.00172641	dystroglycan 1	GO:0016203 muscle attachment;GO:0016340 calcium-dependent cell-matrix adhesion;GO:0021682 nerve maturation
H19	14955	4837.6	-0.745623	0.219996	-3.38925	0.000700841	0.0196809	H19, imprinted maternally expressed transcript	GO:2000653 regulation of genetic imprinting;GO:0040015 negative regulation of multicellular organism growth;GO:0031445 regulation of heterochromatin formation
Lgi2	246316	310.401	-0.74605	0.198505	-3.75835	0.000171037	0.00708944	leucine-rich repeat LGI family, member 2	GO:1904862 inhibitory synapse assembly;GO:0007416 synapse assembly;GO:0034329 cell junction assembly
Dvl3	13544	332.925	-0.748216	0.189784	-3.94245	8.06519e-05	0.0041552	dishevelled segment polarity protein 3	GO:0038031 non-canonical Wnt signaling pathway via JNK cascade;GO:0038030 non-canonical Wnt signaling pathway via MAPK cascade;GO:1904948 midbrain dopaminergic neuron differentiation
Cdon	57810	995.354	-0.750023	0.197599	-3.79569	0.000147234	0.00643217	cell adhesion molecule-related/down-regulated by oncogenes	GO:0014816 skeletal muscle satellite cell differentiation;GO:0060059 embryonic retina morphogenesis in camera-type eye;GO:0010172 embryonic body morphogenesis
Zmiz1	328365	2806.95	-0.750353	0.182646	-4.10825	3.98672e-05	0.0024998	zinc finger, MIZ-type containing 1	GO:0021852 pyramidal neuron migration to cerebral cortex;GO:0007296 vitellogenesis;GO:0140650 radial glia-guided pyramidal neuron migration
Bicra	243842	162.949	-0.75043	0.226539	-3.31259	0.000924351	0.0241775	BRD4 interacting chromatin remodeling complex associated protein	GO:1902459 positive regulation of stem cell population maintenance;GO:2000036 regulation of stem cell population maintenance;GO:0006338 chromatin remodeling
Arhgef11	213498	430.129	-0.750629	0.194683	-3.85564	0.000115427	0.00550921	Rho guanine nucleotide exchange factor (GEF) 11	GO:0007266 Rho protein signal transduction;GO:0007265 Ras protein signal transduction;GO:0007264 small GTPase mediated signal transduction
Mdga1	74762	184.545	-0.751132	0.241338	-3.11237	0.00185592	0.0393294	MAM domain containing glycosylphosphatidylinositol anchor 1	GO:0099179 regulation of synaptic membrane adhesion;GO:0051964 negative regulation of synapse assembly;GO:1905809 negative regulation of synapse organization
Nup98	269966	553.548	-0.751202	0.191725	-3.91811	8.92442e-05	0.00457277	nucleoporin 98	GO:0051292 nuclear pore complex assembly;GO:0006999 nuclear pore organization;GO:0046931 pore complex assembly
Samd9l	209086	837.481	-0.752474	0.187398	-4.01537	5.93514e-05	0.00334022	sterile alpha motif domain containing 9-like	GO:0034058 endosomal vesicle fusion;GO:0035726 common myeloid progenitor cell proliferation;GO:0017145 stem cell division
Rcor3	214742	233.807	-0.752697	0.224862	-3.34738	0.000815801	0.0221833	REST corepressor 3	GO:0016575 histone deacetylation;GO:0006476 protein deacetylation;GO:0035601 protein deacylation
Adcy7	11513	1669.57	-0.752846	0.196135	-3.8384	0.000123836	0.00575989	adenylate cyclase 7	GO:0006171 cAMP biosynthetic process;GO:0046058 cAMP metabolic process;GO:0071285 cellular response to lithium ion
Tubgcp6	328580	324.885	-0.75747	0.2062	-3.67347	0.000239274	0.00903356	tubulin, gamma complex associated protein 6	GO:0007020 microtubule nucleation;GO:0046785 microtubule polymerization;GO:0031109 microtubule polymerization or depolymerization
Tfrc	22042	1063.61	-0.760817	0.171448	-4.4376	9.09671e-06	0.000811143	transferrin receptor	GO:0010637 negative regulation of mitochondrial fusion;GO:0033572 transferrin transport;GO:0071281 cellular response to iron ion
Syne3	212073	1622.12	-0.761677	0.172157	-4.42432	9.67474e-06	0.000840845	spectrin repeat containing, nuclear envelope family member 3	GO:0007097 nuclear migration;GO:0051647 nucleus localization;GO:0008360 regulation of cell shape
Arhgap6	11856	727.407	-0.762965	0.1764	-4.3252	1.52391e-05	0.001189	Rho GTPase activating protein 6	GO:0051895 negative regulation of focal adhesion assembly;GO:0150118 negative regulation of cell-substrate junction organization;GO:0007202 activation of phospholipase C activity
Cacna1c	12288	300.161	-0.766435	0.217617	-3.52194	0.000428401	0.0138745	calcium channel, voltage-dependent, L type, alpha 1C subunit	GO:0061577 calcium ion transmembrane transport via high voltage-gated calcium channel;GO:0098912 membrane depolarization during atrial cardiac muscle cell action potential;GO:0060083 smooth muscle contraction involved in micturition
Wdfy2	268752	121.942	-0.771015	0.231782	-3.32647	0.000879527	0.0233159	WD repeat and FYVE domain containing 2	GO:0045600 positive regulation of fat cell differentiation;GO:0045598 regulation of fat cell differentiation;GO:0001934 positive regulation of protein phosphorylation
Atp11a	50770	1394.08	-0.774945	0.163878	-4.7288	2.2585e-06	0.000274458	ATPase, class VI, type 11A	GO:0010831 positive regulation of myotube differentiation;GO:0010830 regulation of myotube differentiation;GO:0045332 phospholipid translocation
Masp1	17174	363.069	-0.775294	0.202498	-3.82866	0.000128843	0.00586363	mannan-binding lectin serine peptidase 1	GO:0002752 cell surface pattern recognition receptor signaling pathway;GO:0001867 complement activation, lectin pathway;GO:1903028 positive regulation of opsonization
Gfi1	14581	222.77	-0.776101	0.249716	-3.10794	0.00188399	0.039507	growth factor independent 1 transcription repressor	GO:0010956 negative regulation of calcidiol 1-monooxygenase activity;GO:0070105 positive regulation of interleukin-6-mediated signaling pathway;GO:0042660 positive regulation of cell fate specification
Nptxr	73340	327.465	-0.776222	0.194206	-3.9969	6.4178e-05	0.00352699	neuronal pentraxin receptor	GO:0099633 protein localization to postsynaptic specialization membrane;GO:0099645 neurotransmitter receptor localization to postsynaptic specialization membrane;GO:0099150 regulation of postsynaptic specialization assembly
Septin5	18951	542.36	-0.777729	0.219341	-3.54575	0.000391493	0.0130169	septin 5	GO:0099148 regulation of synaptic vesicle docking;GO:0106020 regulation of vesicle docking;GO:0035176 social behavior
Prrg4	228413	247.23	-0.777912	0.21122	-3.68296	0.000230546	0.0087992	proline rich Gla (G-carboxyglutamic acid) 4 (transmembrane)	GO:0008150 biological_process
Adamtsl3	269959	1475.53	-0.779346	0.183349	-4.25061	2.13188e-05	0.00152473	ADAMTS-like 3	GO:0030198 extracellular matrix organization;GO:0043062 extracellular structure organization;GO:0045229 external encapsulating structure organization
Naip6	17952	59.0647	-0.781583	0.258964	-3.01811	0.00254357	0.0475862	NLR family, apoptosis inhibitory protein 6	GO:0016045 detection of bacterium;GO:0010804 negative regulation of tumor necrosis factor-mediated signaling pathway;GO:0098543 detection of other organism
Stra6	20897	251.454	-0.784163	0.235795	-3.32562	0.000882228	0.0233425	stimulated by retinoic acid gene 6	GO:0061143 alveolar primary septum development;GO:0043585 nose morphogenesis;GO:0034633 retinol transport
Syn1	20964	363.345	-0.78461	0.194563	-4.03269	5.51423e-05	0.00316826	synapsin I	GO:0097091 synaptic vesicle clustering;GO:0098693 regulation of synaptic vesicle cycle;GO:0048172 regulation of short-term neuronal synaptic plasticity
Atp10a	11982	813.3	-0.790224	0.182101	-4.33949	1.42816e-05	0.00115362	ATPase, class V, type 10A	GO:1903527 positive regulation of membrane tubulation;GO:1903525 regulation of membrane tubulation;GO:1903729 regulation of plasma membrane organization
Zfpm1	22761	202.486	-0.793026	0.215585	-3.67849	0.000234617	0.00889988	zinc finger protein, multitype 1	GO:0060377 negative regulation of mast cell differentiation;GO:0010724 regulation of definitive erythrocyte differentiation;GO:0003195 tricuspid valve formation
Chd6	71389	814.162	-0.794412	0.175808	-4.51864	6.22375e-06	0.000614296	chromodomain helicase DNA binding protein 6	GO:0036091 positive regulation of transcription from RNA polymerase II promoter in response to oxidative stress;GO:0043619 regulation of transcription from RNA polymerase II promoter in response to oxidative stress;GO:1901522 positive regulation of transcription from RNA polymerase II promoter involved in cellular response to chemical stimulus
Arhgap22	239027	793.651	-0.796849	0.177715	-4.48386	7.33042e-06	0.000666631	Rho GTPase activating protein 22	GO:0090630 activation of GTPase activity;GO:0099175 regulation of postsynapse organization;GO:0043547 positive regulation of GTPase activity
Zfp646	233905	465.363	-0.79962	0.201537	-3.96761	7.2596e-05	0.00387894	zinc finger protein 646	GO:0045944 positive regulation of transcription by RNA polymerase II;GO:0045893 positive regulation of DNA-templated transcription;GO:1903508 positive regulation of nucleic acid-templated transcription
Svil	225115	2065.07	-0.800212	0.202585	-3.95001	7.81493e-05	0.00406584	supervillin	GO:0051014 actin filament severing;GO:0051016 barbed-end actin filament capping;GO:0051693 actin filament capping
Nr2c2	22026	359.17	-0.801719	0.218802	-3.66413	0.000248181	0.00926093	nuclear receptor subfamily 2, group C, member 2	GO:0038066 p38MAPK cascade;GO:0040019 positive regulation of embryonic development;GO:0031663 lipopolysaccharide-mediated signaling pathway
Trip11	109181	237.909	-0.80301	0.213004	-3.76993	0.000163294	0.00694906	thyroid hormone receptor interactor 11	GO:0099041 vesicle tethering to Golgi;GO:0090161 Golgi ribbon formation;GO:0003413 chondrocyte differentiation involved in endochondral bone morphogenesis
Dhrs9	241452	325.488	-0.803799	0.214338	-3.75014	0.000176733	0.00724447	dehydrogenase/reductase (SDR family) member 9	GO:0042904 9-cis-retinoic acid biosynthetic process;GO:0042905 9-cis-retinoic acid metabolic process;GO:0002138 retinoic acid biosynthetic process
Igtp	16145	192.475	-0.804813	0.221604	-3.63177	0.000281482	0.0101948	interferon gamma induced GTPase	GO:0061739 protein lipidation involved in autophagosome assembly;GO:0061762 CAMKK-AMPK signaling cascade;GO:1901098 positive regulation of autophagosome maturation
Lilra5	232801	22.9319	-0.805119	0.259036	-3.10813	0.00188274	0.039507	leukocyte immunoglobulin-like receptor, subfamily A (with TM domain), member 5	GO:0032696 negative regulation of interleukin-13 production;GO:0032695 negative regulation of interleukin-12 production;GO:0032656 regulation of interleukin-13 production
Atf7	223922	154.973	-0.80577	0.221406	-3.63934	0.000273341	0.0099563	activating transcription factor 7	GO:0038066 p38MAPK cascade;GO:0097284 hepatocyte apoptotic process;GO:1904019 epithelial cell apoptotic process
Polr2a	20020	2251.89	-0.806657	0.183833	-4.38799	1.14403e-05	0.000963794	polymerase (RNA) II (DNA directed) polypeptide A	GO:0006353 DNA-templated transcription termination;GO:0033120 positive regulation of RNA splicing;GO:0043484 regulation of RNA splicing
Olr1	108078	84.7714	-0.807412	0.248733	-3.24611	0.00116995	0.0286377	oxidized low density lipoprotein (lectin-like) receptor 1	GO:0007159 leukocyte cell-cell adhesion;GO:0042157 lipoprotein metabolic process;GO:0098609 cell-cell adhesion
Cxcl10	15945	126.934	-0.809871	0.259903	-3.11605	0.00183293	0.0391511	chemokine (C-X-C motif) ligand 10	GO:1901740 negative regulation of myoblast fusion;GO:1901509 regulation of endothelial tube morphogenesis;GO:0034242 negative regulation of syncytium formation by plasma membrane fusion
Itgb4	192897	308.721	-0.811059	0.231936	-3.49691	0.000470683	0.0147904	integrin beta 4	GO:0061450 trophoblast cell migration;GO:0032290 peripheral nervous system myelin formation;GO:0031581 hemidesmosome assembly
Srl	106393	63.4299	-0.811593	0.270008	-3.00581	0.00264875	0.048888	sarcalumenin	GO:0014873 response to muscle activity involved in regulation of muscle adaptation;GO:0002115 store-operated calcium entry;GO:0014874 response to stimulus involved in regulation of muscle adaptation
Hgf	15234	244.588	-0.816667	0.231198	-3.53233	0.000411915	0.0134677	hepatocyte growth factor	GO:0060665 regulation of branching involved in salivary gland morphogenesis by mesenchymal-epithelial signaling;GO:0014856 skeletal muscle cell proliferation;GO:1901299 negative regulation of hydrogen peroxide-mediated programmed cell death
Adamts14	237360	1243.15	-0.818612	0.175552	-4.66307	3.11522e-06	0.000350641	a disintegrin-like and metallopeptidase (reprolysin type) with thrombospondin type 1 motif, 14	GO:0030199 collagen fibril organization;GO:0030198 extracellular matrix organization;GO:0043062 extracellular structure organization
Hivep3	16656	89.2924	-0.819292	0.240302	-3.40942	0.00065101	0.0187638	human immunodeficiency virus type I enhancer binding protein 3	GO:0035914 skeletal muscle cell differentiation;GO:0007519 skeletal muscle tissue development;GO:0060538 skeletal muscle organ development
Gbp2	14469	596.041	-0.823488	0.223104	-3.69104	0.000223336	0.00868796	guanylate binding protein 2	GO:0044406 adhesion of symbiont to host;GO:0042832 defense response to protozoan;GO:0001562 response to protozoan
Cped1	214642	320.676	-0.831026	0.200466	-4.14548	3.39109e-05	0.00218622	cadherin-like and PC-esterase domain containing 1	GO:0008150 biological_process
Spen	56381	1067.95	-0.834012	0.190407	-4.38014	1.18601e-05	0.000993066	spen family transcription repressor	GO:0007219 Notch signaling pathway;GO:0050769 positive regulation of neurogenesis;GO:0051962 positive regulation of nervous system development
Prdm8	77630	174.019	-0.834943	0.24178	-3.45331	0.000553751	0.0166757	PR domain containing 8	GO:0021540 corpus callosum morphogenesis;GO:0021957 corticospinal tract morphogenesis;GO:0051567 histone H3-K9 methylation
Adipoq	11450	49.3838	-0.838682	0.260744	-3.21649	0.00129767	0.0305131	adiponectin, C1Q and collagen domain containing	GO:2000477 regulation of metanephric podocyte development;GO:2000478 positive regulation of metanephric podocyte development;GO:2000532 regulation of renal albumin absorption
Nbeal2	235627	516.259	-0.840629	0.221392	-3.79702	0.000146443	0.00642479	neurobeachin-like 2	GO:0070889 platelet alpha granule organization;GO:0030220 platelet formation;GO:0036344 platelet morphogenesis
Ifitm1	68713	1559.95	-0.841524	0.208316	-4.03965	5.35316e-05	0.00310167	interferon induced transmembrane protein 1	GO:0060337 type I interferon signaling pathway;GO:0071357 cellular response to type I interferon;GO:0046597 negative regulation of viral entry into host cell
Paqr3	231474	43.8203	-0.842726	0.266383	-3.16359	0.00155838	0.0347963	progestin and adipoQ receptor family member III	GO:0034067 protein localization to Golgi apparatus;GO:0033137 negative regulation of peptidyl-serine phosphorylation;GO:0043407 negative regulation of MAP kinase activity
Tgm2	21817	1409.91	-0.842808	0.155936	-5.40482	6.48748e-08	1.58752e-05	transglutaminase 2, C polypeptide	GO:0018277 protein deamination;GO:1904014 response to serotonin;GO:1904015 cellular response to serotonin
Abca2	11305	472.535	-0.844169	0.186112	-4.53581	5.73828e-06	0.000583689	ATP-binding cassette, sub-family A (ABC1), member 2	GO:0150110 negative regulation of cholesterol esterification;GO:0032378 negative regulation of intracellular lipid transport;GO:0032381 negative regulation of intracellular sterol transport
Dagla	269060	592.28	-0.849678	0.213239	-3.98463	6.75846e-05	0.00365382	diacylglycerol lipase, alpha	GO:0098920 retrograde trans-synaptic signaling by lipid;GO:0098921 retrograde trans-synaptic signaling by endocannabinoid;GO:0071926 endocannabinoid signaling pathway
Npnt	114249	40.0589	-0.853343	0.269594	-3.16529	0.00154928	0.0347204	nephronectin	GO:0097195 pilomotor reflex;GO:2000721 positive regulation of transcription from RNA polymerase II promoter involved in smooth muscle cell differentiation;GO:0010694 positive regulation of alkaline phosphatase activity
Syne1	64009	1829.16	-0.855685	0.180542	-4.73954	2.14207e-06	0.000262633	spectrin repeat containing, nuclear envelope 1	GO:0043578 nuclear matrix organization;GO:0090292 nuclear matrix anchoring at nuclear membrane;GO:0051457 maintenance of protein location in nucleus
Numb	18222	198.552	-0.857385	0.22359	-3.83463	0.000125755	0.00577547	NUMB endocytic adaptor protein	GO:0030862 positive regulation of polarized epithelial cell differentiation;GO:0021849 neuroblast division in subventricular zone;GO:0030860 regulation of polarized epithelial cell differentiation
Tram2	170829	110.743	-0.858043	0.248767	-3.44918	0.000562295	0.0168959	translocating chain-associating membrane protein 2	GO:0032964 collagen biosynthetic process;GO:0006616 SRP-dependent cotranslational protein targeting to membrane, translocation;GO:0006614 SRP-dependent cotranslational protein targeting to membrane
Sema7a	20361	1498.05	-0.859397	0.187562	-4.58194	4.60688e-06	0.000490401	sema domain, immunoglobulin domain (Ig), and GPI membrane anchor, (semaphorin) 7A	GO:0048843 negative regulation of axon extension involved in axon guidance;GO:0060907 positive regulation of macrophage cytokine production;GO:0048841 regulation of axon extension involved in axon guidance
Fgfbp3	72514	1012.38	-0.859723	0.216195	-3.97661	6.99044e-05	0.00376442	fibroblast growth factor binding protein 3	GO:0045743 positive regulation of fibroblast growth factor receptor signaling pathway;GO:0043117 positive regulation of vascular permeability;GO:0040036 regulation of fibroblast growth factor receptor signaling pathway
Itgal	16408	134.762	-0.860991	0.232663	-3.7006	0.000215094	0.00843904	integrin alpha L	GO:0035683 memory T cell extravasation;GO:0002291 T cell activation via T cell receptor contact with antigen bound to MHC molecule on antigen presenting cell;GO:0072683 T cell extravasation
Tnks	21951	395.71	-0.861253	0.206331	-4.17413	2.99124e-05	0.00201352	tankyrase, TRF1-interacting ankyrin-related ADP-ribose polymerase	GO:1904743 negative regulation of telomeric DNA binding;GO:1904907 regulation of maintenance of mitotic sister chromatid cohesion, telomeric;GO:1904908 negative regulation of maintenance of mitotic sister chromatid cohesion, telomeric
Asap2	211914	770.757	-0.865875	0.185427	-4.66964	3.01734e-06	0.000345285	ArfGAP with SH3 domain, ankyrin repeat and PH domain 2	GO:0043547 positive regulation of GTPase activity;GO:0043087 regulation of GTPase activity;GO:0051345 positive regulation of hydrolase activity
Piezo1	234839	2764.41	-0.876574	0.171018	-5.12563	2.9654e-07	5.22062e-05	piezo-type mechanosensitive ion channel component 1	GO:0033634 positive regulation of cell-cell adhesion mediated by integrin;GO:0033632 regulation of cell-cell adhesion mediated by integrin;GO:0033625 positive regulation of integrin activation
Ccdc88c	68339	379.612	-0.877027	0.23321	-3.76068	0.000169455	0.00708944	coiled-coil domain containing 88C	GO:0003383 apical constriction;GO:0035567 non-canonical Wnt signaling pathway;GO:0003382 epithelial cell morphogenesis
Spata13	219140	464.042	-0.878667	0.181145	-4.85062	1.23077e-06	0.000167336	spermatogenesis associated 13	GO:0046847 filopodium assembly;GO:0030032 lamellipodium assembly;GO:0097581 lamellipodium organization
Gfod1	328232	1297.03	-0.879318	0.204481	-4.30024	1.7061e-05	0.00128726	glucose-fructose oxidoreductase domain containing 1
Garre1	233103	191.755	-0.880862	0.225075	-3.91364	9.09138e-05	0.004641	granule associated Rac and RHOG effector 1	GO:0016601 Rac protein signal transduction;GO:0007265 Ras protein signal transduction;GO:0007264 small GTPase mediated signal transduction
Apc2	23805	766.115	-0.885293	0.187664	-4.71744	2.38826e-06	0.000285179	APC regulator of WNT signaling pathway 2	GO:0007026 negative regulation of microtubule depolymerization;GO:0031114 regulation of microtubule depolymerization;GO:0031111 negative regulation of microtubule polymerization or depolymerization
Spint1	20732	79.0861	-0.885558	0.258061	-3.43158	0.000600079	0.017721	serine protease inhibitor, Kunitz type 1	GO:0060670 branching involved in labyrinthine layer morphogenesis;GO:0060713 labyrinthine layer morphogenesis;GO:2000178 negative regulation of neural precursor cell proliferation
AI506816	433855	154.398	-0.887752	0.230309	-3.85461	0.000115916	0.00550921	expressed sequence AI506816	GO:0009611 response to wounding;GO:0006950 response to stress;GO:0050896 response to stimulus
Tlr12	384059	16.5764	-0.888396	0.257645	-3.44814	0.000564456	0.0169091	toll-like receptor 12	GO:0042832 defense response to protozoan;GO:0001562 response to protozoan;GO:0002224 toll-like receptor signaling pathway
Lrch3	70144	340.963	-0.888951	0.206381	-4.30732	1.65243e-05	0.00125911	leucine-rich repeats and calponin homology (CH) domain containing 3	GO:0032185 septin cytoskeleton organization;GO:0007010 cytoskeleton organization;GO:0006996 organelle organization
Med12	59024	631.92	-0.89454	0.180827	-4.94695	7.53864e-07	0.000110428	mediator complex subunit 12	GO:0090245 axis elongation involved in somitogenesis;GO:0048702 embryonic neurocranium morphogenesis;GO:1990403 embryonic brain development
Cbl	12402	208.203	-0.896445	0.232991	-3.84756	0.000119302	0.00562973	Casitas B-lineage lymphoma	GO:0032487 regulation of Rap protein signal transduction;GO:2000583 regulation of platelet-derived growth factor receptor-alpha signaling pathway;GO:0007175 negative regulation of epidermal growth factor-activated receptor activity
Ptk2b	19229	604.636	-0.897339	0.215102	-4.17168	3.0236e-05	0.00201554	PTK2 protein tyrosine kinase 2 beta	GO:0043157 response to cation stress;GO:0007172 signal complex assembly;GO:2000537 regulation of B cell chemotaxis	yes
Rcor1	217864	286.03	-0.902883	0.215516	-4.18941	2.79684e-05	0.0019013	REST corepressor 1	GO:0070933 histone H4 deacetylation;GO:0045654 positive regulation of megakaryocyte differentiation;GO:0045652 regulation of megakaryocyte differentiation
Rap1gap	110351	465.894	-0.914187	0.180817	-5.05587	4.28425e-07	7.17456e-05	Rap1 GTPase-activating protein	GO:1903697 negative regulation of microvillus assembly;GO:1904441 regulation of thyroid gland epithelial cell proliferation;GO:1904442 negative regulation of thyroid gland epithelial cell proliferation
Zhx3	320799	130.782	-0.920783	0.233112	-3.94995	7.81665e-05	0.00406584	zinc fingers and homeoboxes 3	GO:0045669 positive regulation of osteoblast differentiation;GO:0045667 regulation of osteoblast differentiation;GO:0000122 negative regulation of transcription by RNA polymerase II
Gm14137	623781	171.203	-0.929872	0.225338	-4.12657	3.6821e-05	0.00234086	predicted gene 14137	GO:0031272 regulation of pseudopodium assembly;GO:0031274 positive regulation of pseudopodium assembly;GO:0030838 positive regulation of actin filament polymerization
Plce1	74055	166.648	-0.933164	0.240176	-3.88533	0.000102191	0.00509321	phospholipase C, epsilon 1	GO:0006651 diacylglycerol biosynthetic process;GO:0010592 positive regulation of lamellipodium assembly;GO:0046339 diacylglycerol metabolic process
Trp53i11	277414	3533.91	-0.943194	0.215508	-4.3766	1.20544e-05	0.00100322	transformation related protein 53 inducible protein 11	GO:0008150 biological_process
Itgax	16411	161.722	-0.947775	0.240246	-3.94502	7.97917e-05	0.00413472	integrin alpha X	GO:1905956 positive regulation of endothelial tube morphogenesis;GO:1901509 regulation of endothelial tube morphogenesis;GO:0031643 positive regulation of myelination
Itga6	16403	2296.66	-0.950378	0.178177	-5.33389	9.61328e-08	2.20016e-05	integrin alpha 6	GO:0097534 lymphoid lineage cell migration;GO:0035878 nail development;GO:0043589 skin morphogenesis
Ern1	78943	557.871	-0.952193	0.188639	-5.04771	4.47146e-07	7.24224e-05	endoplasmic reticulum (ER) to nucleus signalling 1	GO:0070054 mRNA splicing, via endonucleolytic cleavage and ligation;GO:0036290 protein trans-autophosphorylation;GO:1990579 peptidyl-serine trans-autophosphorylation	yes
Pkd1	18763	1957.35	-0.95767	0.181151	-5.28657	1.2463e-07	2.71654e-05	polycystin 1, transient receptor potential channel interacting	GO:0060854 branching involved in lymph vessel morphogenesis;GO:0042994 cytoplasmic sequestering of transcription factor;GO:0051290 protein heterotetramerization
Bdkrb2	12062	95.9504	-0.962916	0.263563	-3.65345	0.000258741	0.00956113	bradykinin receptor, beta 2	GO:1902238 regulation of intrinsic apoptotic signaling pathway in response to osmotic stress by p53 class mediator;GO:1902239 negative regulation of intrinsic apoptotic signaling pathway in response to osmotic stress by p53 class mediator;GO:1990127 intrinsic apoptotic signaling pathway in response to osmotic stress by p53 class mediator
Slfn9	237886	201.009	-0.968124	0.223969	-4.32258	1.54218e-05	0.00118973	schlafen 9	GO:0016078 tRNA catabolic process;GO:0016075 rRNA catabolic process;GO:0034661 ncRNA catabolic process
Fasn	14104	2295.43	-0.982506	0.158984	-6.1799	6.4143e-10	3.26227e-07	fatty acid synthase	GO:0030223 neutrophil differentiation;GO:0008611 ether lipid biosynthetic process;GO:0046504 glycerol ether biosynthetic process
Fmo2	55990	44.3056	-0.99131	0.269908	-3.67277	0.000239935	0.00903356	flavin containing monooxygenase 2	GO:0072592 oxygen metabolic process;GO:0070995 NADPH oxidation;GO:0009404 toxin metabolic process
Zmynd15	574428	85.4968	-1.01516	0.262573	-3.86622	0.000110535	0.00538841	zinc finger, MYND-type containing 15	GO:0007286 spermatid development;GO:0048515 spermatid differentiation;GO:0007281 germ cell development
Acsbg1	94180	610.539	-1.01738	0.225664	-4.5084	6.53192e-06	0.0006183	acyl-CoA synthetase bubblegum family member 1	GO:0042759 long-chain fatty acid biosynthetic process;GO:0000038 very long-chain fatty acid metabolic process;GO:0051384 response to glucocorticoid
Tbx1	21380	62.9007	-1.0206	0.268936	-3.79494	0.000147679	0.00643217	T-box 1	GO:0021644 vagus nerve morphogenesis;GO:2001035 regulation of tongue muscle cell differentiation;GO:2001037 positive regulation of tongue muscle cell differentiation
Fn1	14268	60172.3	-1.02263	0.205789	-4.9693	6.71939e-07	0.000100294	fibronectin 1	GO:1904235 regulation of substrate-dependent cell migration, cell attachment to substrate;GO:1904237 positive regulation of substrate-dependent cell migration, cell attachment to substrate;GO:0007161 calcium-independent cell-matrix adhesion
Plin4	57435	37.719	-1.02708	0.253031	-4.05911	4.92608e-05	0.00290322	perilipin 4
Macf1	442834	248.699	-1.02815	0.209857	-4.89927	9.6191e-07	0.000135015	microtubule-actin crosslinking factor 1	GO:0150011 regulation of neuron projection arborization;GO:0006620 post-translational protein targeting to endoplasmic reticulum membrane;GO:0043001 Golgi to plasma membrane protein transport
Itga2	16398	126.345	-1.03919	0.254397	-4.0849	4.40965e-05	0.00266755	integrin alpha 2	GO:0033343 positive regulation of collagen binding;GO:0033341 regulation of collagen binding;GO:0010694 positive regulation of alkaline phosphatase activity
L1cam	16728	386.926	-1.05299	0.204134	-5.15831	2.49184e-07	4.62405e-05	L1 cell adhesion molecule	GO:0033631 cell-cell adhesion mediated by integrin;GO:0007413 axonal fasciculation;GO:0106030 neuron projection fasciculation
Slco4a1	108115	95.6954	-1.07491	0.261395	-4.1122	3.91898e-05	0.00247998	solute carrier organic anion transporter family, member 4a1	GO:0043252 sodium-independent organic anion transport;GO:0042403 thyroid hormone metabolic process;GO:0018958 phenol-containing compound metabolic process
Spns2	216892	502.079	-1.11171	0.241024	-4.61246	3.97938e-06	0.000432326	spinster homolog 2	GO:0048073 regulation of eye pigmentation;GO:0003376 sphingosine-1-phosphate receptor signaling pathway;GO:0090520 sphingolipid mediated signaling pathway
Mmp28	118453	155.926	-1.12472	0.250498	-4.48994	7.12419e-06	0.000652196	matrix metallopeptidase 28 (epilysin)	GO:0010760 negative regulation of macrophage chemotaxis;GO:1905522 negative regulation of macrophage migration;GO:0002689 negative regulation of leukocyte chemotaxis
Sufu	24069	140.976	-1.18636	0.225377	-5.26391	1.4102e-07	2.93407e-05	SUFU negative regulator of hedgehog signaling	GO:0021775 smoothened signaling pathway involved in ventral spinal cord interneuron specification;GO:0021776 smoothened signaling pathway involved in spinal cord motor neuron cell fate specification;GO:1990787 negative regulation of hh target transcription factor activity
Kif13b	16554	228.013	-1.19707	0.218671	-5.4743	4.39243e-08	1.11698e-05	kinesin family member 13B	GO:0050770 regulation of axonogenesis;GO:0007018 microtubule-based movement;GO:0010975 regulation of neuron projection development
Ism1	319909	67.923	-1.21598	0.256349	-4.74344	2.10115e-06	0.0002623	isthmin 1, angiogenesis inhibitor	GO:0016525 negative regulation of angiogenesis;GO:2000181 negative regulation of blood vessel morphogenesis;GO:1901343 negative regulation of vasculature development
Scgb1a1	22287	72.1568	-1.36879	0.269743	-5.07443	3.88665e-07	6.58908e-05	secretoglobin, family 1A, member 1	GO:0032616 interleukin-13 production;GO:0032696 negative regulation of interleukin-13 production;GO:0032634 interleukin-5 production
Fam167a	219148	547.584	-1.38194	0.240922	-5.73604	9.69158e-09	3.32712e-06	family with sequence similarity 167, member A	GO:0008150 biological_process
Hhip	15245	143.333	-1.4848	0.246347	-6.02729	1.66736e-09	7.38585e-07	Hedgehog-interacting protein	GO:0060441 epithelial tube branching involved in lung morphogenesis;GO:0040036 regulation of fibroblast growth factor receptor signaling pathway;GO:0045879 negative regulation of smoothened signaling pathway
Sftpc	20389	89.4976	-2.05914	0.266974	-7.71289	1.22997e-14	1.53545e-11	surfactant associated protein C

## Sheet: Table S2B
Table S2B. Human homologeous genes of murine DEGs
Gene symbol (human)	GeneID (human)
MFAP5	8076
ADAMTS15	170689
FNDC1	84624
CCN5	8839
PCSK5	5125
LOX	4015
SULF1	23213
LOXL1	4016
IGF1	3479
MFAP2	4237
DPEP1	1800
RCN3	57333
CMA1	1215
SPON1	10418
ABI3BP	25890
ADAMTS5	11096
KLK3	354
CPA3	1359
PF4	5196
FBLN2	2199
RARRES2	5919
NBL1	4681
DMKN	93099
GPX7	2882
GALNT16	57452
ADGRD1	283383
FCER1A	2205
COL1A2	1278
POSTN	10631
TMEM45A	55076
DKK3	27122
CHL1	10752
CTSK	1513
CTHRC1	115908
SRPX2	27286
SELENOP	6414
DACT1	51339
HMOX1	3162
PLA1A	51365
TNN	63923
FIBIN	387758
ADAMTS2	9509
BDH2	56898
CLEC11A	6320
PTGIS	5740
PPBP	5473
ARSI	340075
SVEP1	79987
DPP4	1803
COL1A1	1277
RNF128	79589
NDUFA4L2	56901
LBP	3929
COL5A2	1290
IGSF3	3321
CDH11	1009
SLIT3	6586
TPSAB1	7177
ITGBL1	9358
GALNT17	64409
THY1	7070
LOXL2	4017
TIMP3	7078
MS4A4A	51338
CLEC10A	10462
CADM3	57863
TAGLN	6876
CCL24	6369
OGN	4969
PRELP	5549
MMP9	4318
CFB	629
PTN	5764
C1QTNF2	114898
PI16	221476
MGST1	4257
BMPR2	659
ARMH4	145407
NPL	80896
VLDLR	7436
COL27A1	85301
TCEAL9	51186
CRISPLD2	83716
MMP23B	8510
CCL15	6359
FBLN1	2192
IL11RA	3590
COL14A1	7373
TMEM100	55273
SLC9B2	133308
CXCL12	6387
AKR1C3	8644
CSRP2	1466
TENT5A	55603
FST	10468
COL12A1	1303
SOD3	6649
PLAC8	51316
ADAMTSL1	92949
SSPN	8082
SEL1L3	23231
CSTA	1475
MFAP4	4239
MT3	4504
MMP2	4313
BARX2	8538
SERPING1	710
PGAP6	58986
BRINP3	339479
MARCKS	4082
PAMR1	25891
SLC40A1	30061
EDNRB	1910
ACKR3	57007
SLPI	6590
SCN7A	6332
MRC1	4360
RNASE4	6038
C1orf115	79762
SOX11	6664
RPL34	6164
OLFML1	283298
GREM2	64388
CD36	948
PDPN	10630
PMP22	5376
TIMP1	7076
BICC1	80114
GSTA4	2941
GAS6	2621
ADAM12	8038
SBSN	374897
GFRA4	64096
SOX4	6659
MBL2	4153
WNT2	7472
SLC16A2	6567
CYGB	114757
IFI16	3428
MGP	4256
RPL41	6171
CPZ	8532
GEM	2669
CD302	9936
ND6	4541
CA9	768
DDX3Y	8653
F13A1	2162
CRIP1	1396
MAGEH1	28986
KLK3	354
EFNA5	1946
PAPSS2	9060
CHGA	1113
ISLR	3671
ASPN	54829
MGST2	4258
CD5L	922
C1S	716
GRB14	2888
CELA1	1990
SAA1	6288
CDKN1C	1028
ENPP1	5167
NDUFA5	4698
GPC6	10082
CLEC4D	338339
FBN2	2201
ATP6V0D2	245972
GPC3	2719
CFP	5199
CYP1B1	1545
PYGL	5836
ADAM23	8745
SERPINB2	5055
FABP5	2171
CCL15	6359
LY6H	4062
PKDCC	91461
COPS9	150678
SPON2	10417
DNM3OS	100628315
DDAH1	23576
P4HA3	283208
DRAM1	55332
ITM2A	9452
TFPI2	7980
MAGOHB	55110
NUCKS1	64710
ATP5MJ	9556
MCOLN2	255231
MAF	4094
PRG4	10216
SFRP2	6423
VWA5A	4013
EIF2S3	1968
PODN	127435
NR2C2AP	126382
ATP5PD	10476
HDDC2	51020
CD200R1	131450
MSRB3	253827
DCXR	51181
EIF3J	8669
NFIB	4781
LARP6	55323
PDLIM4	8572
RBM26	64062
SNRPE	6635
ECRG4	84417
ATP5MG	10632
SPARC	6678
MEG3	55384
ACTA2	59
TIGD2	166815
MAGED2	10916
F10	2159
CYP7B1	9420
TOMM7	54543
NDUFA4	4697
BCAT1	586
ASCL2	430
ANP32A	8125
ACP5	54
SEC61G	23480
CCL2	6347
CELF2	10659
SLC10A6	345274
DPYSL2	1808
RPL21	6144
PET100	100131801
ATP5F1E	514
TMEM256	254863
SMAGP	57228
DCSTAMP	81501
CNRIP1	25927
LLPH	84298
HPSE	10855
IFTAP	119710
SEM1	7979
GADD45G	10912
GLIPR2	152007
MRPL33	9553
H3C14	126961
PDGFRL	5157
GDA	9615
RPL27A	6157
ROMO1	140823
ARHGDIB	397
RALGPS2	55103
TXN	7295
FTL	2512
PLA2G12A	81579
POLR2L	5441
ING2	3622
SAP30	8819
TMEM263	90488
IFI27L2	83982
SRP9	6726
CCDC34	91057
SHOX	6473
DBI	1622
FOLR2	2350
MRPL13	28998
SEC61B	10952
C1orf21	81563
S100A16	140576
DPM3	54344
ELOC	6921
NDUFC2	4718
POLR2G	5436
ZCRB1	85437
CTSB	1508
MALSU1	115416
EIF2S2	8894
RPL37A	6168
RPS21	6227
FSTL1	11167
S100A10	6281
C1orf53	388722
RNF130	55819
UQCRH	7388
NDUFA3	4696
PTTG1	9232
RPS13	6207
NDUFA2	4695
NFIA	4774
COX5A	9377
TBCA	6902
PRDX1	5052
FCN2	2220
UQCC3	790955
LAMTOR4	389541
RBM25	58517
DCAF13	25879
UQCRB	7381
NDUFB8	4714
CNBP	7555
LSM7	51690
ATP5MK	84833
MPHOSPH6	10200
NPM1	4869
FKBP11	51303
PSTK	118672
ESD	2098
LSM3	27258
PRDX6	9588
RPL6	6128
COMMD3	23412
FTH1	2495
MYL6	4637
COX6B1	1340
MTARC2	54996
NXPE4	54827
VAMP8	8673
BNC1	646
LRP5	4041
PPP1R10	5514
CSK	1445
CABIN1	23523
RGMA	56963
TSC1	7248
CEP250	11190
SOGA1	140710
TRERF1	55809
MMP10	4319
TTC17	55761
BACE1	23621
IRAK2	3656
VPS13C	54832
LGALS3BP	3959
LSS	4047
PLXNA1	5361
ASH1L	55870
MAP3K3	4215
STRN	6801
ZMIZ2	83637
LRRK2	120892
FOXO3	2309
MEF2A	4205
ARHGEF18	23370
SCD	6319
POM121C	100101267
LOXL3	84695
RNF213	57674
TNRC18	84629
ITPR3	3710
CAP1	10487
HECTD4	283450
ADAM10	102
TYK2	7297
MINK1	50488
THADA	63892
LAMA5	3911
ENTPD1	953
CCBE1	147372
VPS13D	55187
NARF	26502
IGF2R	3482
PLEKHO2	80301
CREB3L2	64764
SERPINB9	5272
PCNT	5116
STON1	11037
MIB1	57534
CARM1	10498
ZER1	10444
APCDD1	147495
GATAD2B	57459
DOCK5	80005
EP300	2033
TRIM56	81844
SH2B3	10019
TMEM119	338773
KCNQ5	56479
TWSG1	57045
AGO2	27161
AGRN	375790
FKRP	79147
XPO5	57510
RPTOR	57521
ANKRD52	283373
FRYL	285527
SLX4	84464
WNT7B	7477
MEF2D	4209
PCDHGC3	5098
RIPOR1	79567
SPRED2	200734
ABCA3	21
SYNJ2	8871
ATF7IP	55729
GCH1	2643
WIZ	58525
DOCK9	23348
FILIP1L	11259
CX3CL1	6376
NDST1	3340
MAN1A1	4121
TENM4	26011
CCL11	6356
IRS2	8660
RAPGEF4	11069
CRKL	1399
CLCN6	1185
EPG5	57724
ACSS2	55902
TNS2	23371
DOT1L	84444
KCNH2	3757
NCOR2	9612
HERC2	8924
DOCK10	55619
NAIP	4671
SEPSECS	51091
DENND4C	55667
MOB1A	55233
EPS8L2	64787
PEG3	5178
GBP4	115361
ACP3	55
BAHCC1	57597
TARBP1	6894
HCN2	610
MICAL2	9645
SHANK3	85358
DAG1	1605
H19	283120
LGI2	55203
DVL3	1857
CDON	50937
ZMIZ1	57178
BICRA	29998
ARHGEF11	9826
MDGA1	266727
NUP98	4928
SAMD9L	219285
RCOR3	55758
ADCY7	113
TUBGCP6	85378
TFRC	7037
SYNE3	161176
ARHGAP6	395
CACNA1C	775
WDFY2	115825
ATP11A	23250
MASP1	5648
GFI1	2672
NPTXR	23467
SEPTIN5	5413
PRRG4	79056
ADAMTSL3	57188
NAIP	4671
STRA6	64220
SYN1	6853
ATP10A	57194
ZFPM1	161882
CHD6	84181
ARHGAP22	58504
ZNF646	9726
SVIL	6840
NR2C2	7182
TRIP11	9321
DHRS9	10170
IRGM	345611
LILRA5	353514
ATF7	11016
POLR2A	5430
OLR1	4973
CXCL10	3627
ITGB4	3691
SRL	6345
HGF	3082
ADAMTS14	140766
HIVEP3	59269
GBP2	2634
CPED1	79974
SPEN	23013
PRDM8	56978
ADIPOQ	9370
NBEAL2	23218
IFITM3	10410
PAQR3	152559
TGM2	7052
ABCA2	20
DAGLA	747
NPNT	255743
SYNE1	23345
NUMB	8650
TRAM2	9697
SEMA7A	8482
FGFBP3	143282
ITGAL	3683
TNKS	8658
ASAP2	8853
PIEZO1	9780
CCDC88C	440193
SPATA13	221178
GFOD1	54438
GARRE1	9710
APC2	10297
SPINT1	6692
TLR4	7099
LRCH3	84859
MED12	9968
CBL	867
PTK2B	2185
RCOR1	23186
RAP1GAP	5909
ZHX3	23051
C15orf62	643338
PLCE1	51196
TP53I11	9537
ITGAX	3687
ITGA6	3655
ERN1	2081
PKD1	5310
BDKRB2	624
SLFN13	146857
FASN	2194
FMO2	2327
ZMYND15	84225
ACSBG1	23205
TBX1	6899
FN1	2335
PLIN4	729359
MACF1	23499
ITGA2	3673
L1CAM	3897
SLCO4A1	28231
SPNS2	124976
MMP28	79148
SUFU	51684
KIF13B	23303
ISM1	140862
SCGB1A1	7356
FAM167A	83648
HHIP	64399
SFTPC	6440
