# Supplementary material for: Taxifolin Inhibits the Growth of Non-Small-Cell Lung Cancer via Downregulating Genes Displaying Novel and Robust Associations with Immune Evasion Factors
Source: Cancers (Basel). 2023 Sep 30;15(19):4818. doi: 10.3390/cancers15194818 (PMC10571863; doi:10.3390/cancers15194818)
Supplement: Supplementary file 1 [file cancers-15-04818-s001.zip › Table S3.pdf]

Table S3. Spearman correlations among ITGAL, ITGAX, and TMEM119 in LUAD and LUSC

|         | ITGAL | ITGAX                                                                                          | TMEM119                                                                                       |
|---------|-------|------------------------------------------------------------------------------------------------|-----------------------------------------------------------------------------------------------|
| ITGAL   | 1     | rho = 0.76, $p = 2.88\text{e-}96^{\text{i}}$<br>rho = 0.79, $p = 2.90\text{e-}107^{\text{ii}}$ | rho = 0.50, $p = 6.13\text{e-}33^{\text{i}}$<br>rho = 0.66, $p = 1.90\text{e-}64^{\text{ii}}$ |
| ITGAX   |       | 1                                                                                              | rho = 0.40, $p = 1.08\text{e-}20^{\text{i}}$<br>rho = 0.64, $p = 1.82\text{e-}58^{\text{ii}}$ |
| TMEM119 |       |                                                                                                | 1                                                                                             |

Spearman correlation (rho) was determined using the TCGA Firehole Legacy LUAD (n = 510) and LUSC (n = 501) datasets; i: LUAD; ii: LUSC
